# Supplementary material for: RBMX2 links Mycobacterium bovis infection to epithelial–mesenchymal transition and lung cancer progression
Source: eLife. 2025 Nov 24;14:RP107132. doi: 10.7554/eLife.107132 (PMC12643470; doi:10.7554/eLife.107132)
Supplement: Supplementary file 2. [file elife-107132-supp2.xlsx]

## Sheet: Sheet1
E2F7	hTFtarget	NC_037357.1:14356363-14358362	746	761	+	21.8286	2.06e-08	8.07e-05	GGAGTGGGGGAAGGGA
E2F7	hTFtarget	NC_037357.1:14356363-14358362	748	763	-	21.0429	4.03e-08	0.000158	CTTCCCTTCCCCCACT
E2F7	hTFtarget	NC_037357.1:14356363-14358362	746	761	-	20.4286	4.03e-08	0.000159	TCCCTTCCCCCACTCC
ZNF148	database	NC_037357.1:14356363-14358362	746	760	+	20.3034	4.18e-08	0.000163	GGAGTGGGGGAAGGG
ZNF281	database	NC_037357.1:14356363-14358362	746	760	+	20.2755	4.18e-08	0.000163	GGAGTGGGGGAAGGG
E2F7	hTFtarget	NC_037357.1:14356363-14358362	746	761	-	21.1053	4.58e-08	0.000179	TCCCTTCCCCCACTCC
BRD4	hTFtarget	NC_037357.1:14356363-14358362	745	766	-	19.5195	7.54e-08	0.000285	TCTCTTCCCTTCCCCCACTCCA
ZKSCAN1	hTFtarget	NC_037357.1:14356363-14358362	1729	1750	-	18.7399	9.85e-08	0.000382	CTACAAATGTTTGCTGAATTAA
FLI1	hTFtarget	NC_037357.1:14356363-14358362	71	95	-	0.8	1.26e-07	0.000476	CTTTCCCTCCTGACTTCTCTGTTTC
CREBBP	hTFtarget	NC_037357.1:14356363-14358362	741	752	-	17.3947	1.45e-07	0.000575	CCACTCCAACCC
HNF1B	database	NC_037357.1:14356363-14358362	1268	1279	+	18.6396	1.51e-07	0.000592	TTAATATTTAAC
HNF1B	database	NC_037357.1:14356363-14358362	1268	1279	+	18.6396	1.51e-07	0.000598	TTAATATTTAAC
ZNF524	database	NC_037357.1:14356363-14358362	1807	1820	-	18.8469	1.57e-07	0.000623	GGCAAGGGTGCGAG
CREB1	hTFtarget	NC_037357.1:14356363-14358362	747	771	-	18.2432	2.33e-07	0.000865	CTGTGTCTCTTCCCTTCCCCCACTC
SP1	hTFtarget	NC_037357.1:14356363-14358362	1921	1942	-	18.7273	2.79e-07	0.0011	GGCGCGCCGGGGGCGTAGCGCC
RCOR1	hTFtarget	NC_037357.1:14356363-14358362	1284	1299	+	18.3521	3e-07	0.00117	TTGAACCTCAGTTTCT
E2F7	hTFtarget	NC_037357.1:14356363-14358362	749	760	-	18.3421	3.48e-07	0.00136	CCCTTCCCCCAC
TEAD3	database	NC_037357.1:14356363-14358362	1105	1119	+	16.0893	3.8e-07	0.00146	TAAAGCAGATATATC
TEAD3	database	NC_037357.1:14356363-14358362	1105	1119	-	16.1188	3.82e-07	0.00146	GATATATCTGCTTTA
EHF	hTFtarget	NC_037357.1:14356363-14358362	1654	1675	+	16.9178	4.25e-07	0.00161	GGGAGTGAAGGATGGAGGCGGA
GTF2I	hTFtarget	NC_037357.1:14356363-14358362	1296	1311	+	17.7237	4.61e-07	0.00182	TTCTTCTATAAAATGG
RCOR1	hTFtarget	NC_037357.1:14356363-14358362	1297	1312	+	17.2	5.09e-07	0.002	TCTTCTATAAAATGGA
BRD4	hTFtarget	NC_037357.1:14356363-14358362	751	772	-	17.4026	5.18e-07	0.000979	TCTGTGTCTCTTCCCTTCCCCC
RXRA	hTFtarget	NC_037357.1:14356363-14358362	740	751	-	16.3684	5.32e-07	0.00211	CACTCCAACCCA
ETS1	hTFtarget	NC_037357.1:14356363-14358362	1453	1468	-	16.9351	5.68e-07	0.00224	CTTTTCCACAGTCTCC
SMAD1	hTFtarget	NC_037357.1:14356363-14358362	1920	1941	+	17.0789	5.73e-07	0.00225	AGGCGCTACGCCCCCGGCGCGC
GTF2I	hTFtarget	NC_037357.1:14356363-14358362	909	930	-	17.3421	6.65e-07	0.00261	CCCTAGCTCAGGACCCCTGAAA
ESR1	hTFtarget	NC_037357.1:14356363-14358362	751	772	+	12.6761	6.99e-07	0.00269	GGGGGAAGGGAAGAGACACAGA
LMO2	hTFtarget	NC_037357.1:14356363-14358362	500	515	+	17.0921	7.22e-07	0.00283	GCTTCAGCTTCCTTTT
IRF3	hTFtarget	NC_037357.1:14356363-14358362	752	773	+	17.2676	7.39e-07	0.00284	GGGGAAGGGAAGAGACACAGAA
HOXA6	hTFtarget	NC_037357.1:14356363-14358362	1627	1642	+	17.2895	7.48e-07	0.00296	TGGGGGTGCGCGTGTG
EWSR1	hTFtarget	NC_037357.1:14356363-14358362	746	764	+	10.6667	8.54e-07	0.0032	GGAGTGGGGGAAGGGAAGA
ZNF274	hTFtarget	NC_037357.1:14356363-14358362	1454	1468	-	17.0571	8.82e-07	0.0035	CTTTTCCACAGTCTC
HIF1A	hTFtarget	NC_037357.1:14356363-14358362	1629	1644	-	16.7922	8.92e-07	0.00191	CTCACACGCGCACCCC
SPI1	hTFtarget	NC_037357.1:14356363-14358362	1667	1682	-	16.9868	9.42e-07	0.00368	CCCAAATTCCGCCTCC
RELA	hTFtarget	NC_037357.1:14356363-14358362	1955	1975	-	16.5921	9.54e-07	0.00377	GCCGCGGAGCTTGCGCCACGC
HIF1A	hTFtarget	NC_037357.1:14356363-14358362	1627	1642	-	16.7143	9.6e-07	0.00191	CACACGCGCACCCCCA
SOX17	hTFtarget	NC_037357.1:14356363-14358362	1148	1165	-	16.5455	9.76e-07	0.00386	TGGGTTCTTTGCCTTCAA
HOXB6	database	NC_037357.1:14356363-14358362	1225	1237	-	17.2342	1.01e-06	0.00394	GTTGATTTATGAA
SPI1	hTFtarget	NC_037357.1:14356363-14358362	1920	1941	+	16.8429	1.03e-06	0.00397	AGGCGCTACGCCCCCGGCGCGC
FOXK1	hTFtarget	NC_037357.1:14356363-14358362	1630	1645	-	16.6056	1.13e-06	0.00446	ACTCACACGCGCACCC
HNF1B	hTFtarget	NC_037357.1:14356363-14358362	725	742	+	16.625	1.13e-06	0.00444	AAGTTAATGAATAGCTGG
GTF2I	hTFtarget	NC_037357.1:14356363-14358362	1283	1298	+	15.8714	1.19e-06	0.00466	TTTGAACCTCAGTTTC
SPI1	hTFtarget	NC_037357.1:14356363-14358362	1919	1939	+	16.6714	1.23e-06	0.00484	CAGGCGCTACGCCCCCGGCGC
ZNF75A	database	NC_037357.1:14356363-14358362	1477	1488	-	16.8673	1.26e-06	0.00497	TGTGTGAAAAGC
SRF	hTFtarget	NC_037357.1:14356363-14358362	1923	1944	+	16.25	1.29e-06	0.00505	CGCTACGCCCCCGGCGCGCCAG
FLI1	hTFtarget	NC_037357.1:14356363-14358362	72	96	+	-2.67105	1.32e-06	0.00494	AAACAGAGAAGTCAGGAGGGAAAGT
CENPA	hTFtarget	NC_037357.1:14356363-14358362	1244	1268	+	14.4	1.34e-06	0.00524	GTAGACAGAGTACCTTTCAAACCAT
BRD4	hTFtarget	NC_037357.1:14356363-14358362	740	761	-	16.1948	1.39e-06	0.00176	TCCCTTCCCCCACTCCAACCCA
TP53	hTFtarget	NC_037357.1:14356363-14358362	282	303	-	16.131	1.44e-06	0.00554	CTGGGAAGGTTTTCAGCTCTCC
IRF8	database	NC_037357.1:14356363-14358362	779	790	+	17.2752	1.51e-06	0.00597	GAAGAGAAACTG
FLI1	hTFtarget	NC_037357.1:14356363-14358362	78	95	+	3.30303	1.52e-06	0.00577	AGAAGTCAGGAGGGAAAG
BRD3	hTFtarget	NC_037357.1:14356363-14358362	1627	1642	+	16.3766	1.54e-06	0.00611	TGGGGGTGCGCGTGTG
C17orf96	hTFtarget	NC_037357.1:14356363-14358362	489	513	-	15.9494	1.54e-06	0.00583	AAGGAAGCTGAAGCAAAAGAGGGGA
EBF1	database	NC_037357.1:14356363-14358362	1445	1455	+	16.7398	1.56e-06	0.0062	CTCCCTTGGGA
ZNF143	hTFtarget	NC_037357.1:14356363-14358362	772	787	-	15.5	1.57e-06	0.00604	TTTCTCTTCATTCATT
SOX5	database	NC_037357.1:14356363-14358362	1425	1434	+	13.1919	1.64e-06	0.00644	TTAACAATAC
ESR1	hTFtarget	NC_037357.1:14356363-14358362	748	772	+	15.8507	1.64e-06	0.0062	AGTGGGGGAAGGGAAGAGACACAGA
EP300	hTFtarget	NC_037357.1:14356363-14358362	1922	1946	+	15.7143	1.65e-06	0.0064	GCGCTACGCCCCCGGCGCGCCAGTG
EBF1	database	NC_037357.1:14356363-14358362	1445	1456	+	16.0918	1.71e-06	0.00676	CTCCCTTGGGAG
KDM5B	hTFtarget	NC_037357.1:14356363-14358362	71	95	+	15.859	1.72e-06	0.00251	GAAACAGAGAAGTCAGGAGGGAAAG
HNF1A	database	NC_037357.1:14356363-14358362	723	743	-	14.7849	1.74e-06	0.00669	CCCAGCTATTCATTAACTTGG
EBF1	database	NC_037357.1:14356363-14358362	1445	1456	+	16.1552	1.75e-06	0.0069	CTCCCTTGGGAG
NR3C1	database	NC_037357.1:14356363-14358362	798	816	+	13.8876	1.75e-06	0.00687	TGGGCAGATTCTGTTCTGC
BCL3	hTFtarget	NC_037357.1:14356363-14358362	1629	1644	-	15.3333	1.8e-06	0.00714	CTCACACGCGCACCCC
SPI1	hTFtarget	NC_037357.1:14356363-14358362	1919	1943	+	15.3714	1.81e-06	0.00704	CAGGCGCTACGCCCCCGGCGCGCCA
POU5F1	hTFtarget	NC_037357.1:14356363-14358362	94	108	+	15.3433	1.84e-06	0.00723	AGTGTATGTGGATGT
BRD4	hTFtarget	NC_037357.1:14356363-14358362	1654	1675	-	15.8182	1.87e-06	0.00177	TCCGCCTCCATCCTTCACTCCC
ESR1	hTFtarget	NC_037357.1:14356363-14358362	751	772	+	15.5821	1.9e-06	0.00731	GGGGGAAGGGAAGAGACACAGA
ZBTB7A	hTFtarget	NC_037357.1:14356363-14358362	1925	1940	-	16.0758	2.01e-06	0.00796	CGCGCCGGGGGCGTAG
KDM5B	hTFtarget	NC_037357.1:14356363-14358362	747	771	+	15.5128	2.08e-06	0.00251	GAGTGGGGGAAGGGAAGAGACACAG
EHF	hTFtarget	NC_037357.1:14356363-14358362	749	770	+	15.3699	2.11e-06	0.00398	GTGGGGGAAGGGAAGAGACACA
SMAD1	hTFtarget	NC_037357.1:14356363-14358362	1978	1999	-	14.6184	2.14e-06	0.0042	CCCGGCGCCTCGCGCCCATTGC
HOXA6	hTFtarget	NC_037357.1:14356363-14358362	1629	1644	+	15.7895	2.2e-06	0.00435	GGGGTGCGCGTGTGAG
CEBPA	hTFtarget	NC_037357.1:14356363-14358362	752	760	-	15.4605	2.23e-06	0.00874	CCCTTCCCC
GTF2I	hTFtarget	NC_037357.1:14356363-14358362	912	927	+	15.3421	2.24e-06	0.00885	CAGGGGTCCTGAGCTA
CREB1	hTFtarget	NC_037357.1:14356363-14358362	741	765	-	15.3581	2.25e-06	0.00418	CTCTTCCCTTCCCCCACTCCAACCC
FLI1	hTFtarget	NC_037357.1:14356363-14358362	748	763	-	15.5921	2.29e-06	0.00865	CTTCCCTTCCCCCACT
EZH2	hTFtarget	NC_037357.1:14356363-14358362	751	772	-	15.5714	2.3e-06	0.00877	TCTGTGTCTCTTCCCTTCCCCC
KDM5B	hTFtarget	NC_037357.1:14356363-14358362	751	775	+	15.3077	2.33e-06	0.00251	GGGGGAAGGGAAGAGACACAGAATG
NFE2	hTFtarget	NC_037357.1:14356363-14358362	255	276	-	15.2564	2.37e-06	0.00896	TCTACTCCTTTCTTCACCAGTA
CDX2	hTFtarget	NC_037357.1:14356363-14358362	1281	1291	-	15.5132	2.42e-06	0.00953	AGGTTCAAAGG
TFDP2	database	NC_037357.1:14356363-14358362	1980	1993	+	16.2143	2.46e-06	0.00975	AATGGGCGCGAGGC
TFDP1	database	NC_037357.1:14356363-14358362	1980	1993	+	16.1468	2.47e-06	0.00981	AATGGGCGCGAGGC
WT1	database	NC_037357.1:14356363-14358362	1928	1937	+	15.3258	2.52e-06	0.01	CGCCCCCGGC
KLF1	hTFtarget	NC_037357.1:14356363-14358362	1631	1642	-	15.6711	2.58e-06	0.0103	CACACGCGCACC
TP53	hTFtarget	NC_037357.1:14356363-14358362	308	323	-	15.4211	2.61e-06	0.0104	GTGGAGATGTCCCAGG
KDM5B	hTFtarget	NC_037357.1:14356363-14358362	749	773	+	15.0385	2.69e-06	0.00251	GTGGGGGAAGGGAAGAGACACAGAA
SPI1	hTFtarget	NC_037357.1:14356363-14358362	1922	1940	+	15.5857	2.73e-06	0.0106	GCGCTACGCCCCCGGCGCG
AR	hTFtarget	NC_037357.1:14356363-14358362	800	815	-	14.4697	2.73e-06	0.0108	CAGAACAGAATCTGCC
EBF1	hTFtarget	NC_037357.1:14356363-14358362	1445	1456	-	15.803	2.77e-06	0.011	CTCCCAAGGGAG
SP4	database	NC_037357.1:14356363-14358362	1974	1997	+	14.3535	2.79e-06	0.00906	GCAAGCAATGGGCGCGAGGCGCCG
SP4	database	NC_037357.1:14356363-14358362	1974	1997	+	14.3535	2.81e-06	0.00912	GCAAGCAATGGGCGCGAGGCGCCG
EP300	hTFtarget	NC_037357.1:14356363-14358362	1919	1943	+	14.3421	2.83e-06	0.0111	CAGGCGCTACGCCCCCGGCGCGCCA
CTBP2	hTFtarget	NC_037357.1:14356363-14358362	746	761	+	15.3857	2.84e-06	0.011	GGAGTGGGGGAAGGGA
TBX2	database	NC_037357.1:14356363-14358362	69	93	-	14.98	2.85e-06	0.011	TTCCCTCCTGACTTCTCTGTTTCAG
PRDM1	hTFtarget	NC_037357.1:14356363-14358362	84	98	+	15.5	2.94e-06	0.0114	CAGGAGGGAAAGTGT
SPI1	hTFtarget	NC_037357.1:14356363-14358362	1919	1940	-	14.5857	2.96e-06	0.0115	CGCGCCGGGGGCGTAGCGCCTG
ZBTB10	hTFtarget	NC_037357.1:14356363-14358362	75	90	+	15.3816	2.98e-06	0.0097	CAGAGAAGTCAGGAGG
TBX2	database	NC_037357.1:14356363-14358362	69	93	+	14.8919	3.02e-06	0.0117	CTGAAACAGAGAAGTCAGGAGGGAA
SP1	hTFtarget	NC_037357.1:14356363-14358362	1924	1935	-	15.6571	3.03e-06	0.012	CGGGGGCGTAGC
ZKSCAN1	hTFtarget	NC_037357.1:14356363-14358362	1712	1723	+	15.3026	3.07e-06	0.0121	CAGGCACTTTTT
SPI1	hTFtarget	NC_037357.1:14356363-14358362	1918	1939	-	15.3571	3.14e-06	0.0122	GCGCCGGGGGCGTAGCGCCTGA
HOXA6	hTFtarget	NC_037357.1:14356363-14358362	1632	1642	-	15.2237	3.22e-06	0.0127	CACACGCGCAC
EGR1	hTFtarget	NC_037357.1:14356363-14358362	1919	1938	+	14.6818	3.24e-06	0.0128	CAGGCGCTACGCCCCCGGCG
IRF5	hTFtarget	NC_037357.1:14356363-14358362	494	512	+	12.9342	3.26e-06	0.0126	TCTTTTGCTTCAGCTTCCT
SPI1	hTFtarget	NC_037357.1:14356363-14358362	1921	1936	-	15.2143	3.28e-06	0.0128	CCGGGGGCGTAGCGCC
TBP	hTFtarget	NC_037357.1:14356363-14358362	1923	1934	+	15.2895	3.29e-06	0.0131	CGCTACGCCCCC
TRIM28	hTFtarget	NC_037357.1:14356363-14358362	766	787	+	15.1447	3.31e-06	0.0127	ACACAGAATGAATGAAGAGAAA
PRDM1	hTFtarget	NC_037357.1:14356363-14358362	85	98	+	15.4857	3.36e-06	0.013	AGGAGGGAAAGTGT
HOXA4	database	NC_037357.1:14356363-14358362	724	740	-	14.3621	3.37e-06	0.0133	AGCTATTCATTAACTTG
STAT1	hTFtarget	NC_037357.1:14356363-14358362	496	511	+	14.3974	3.47e-06	0.0133	TTTTGCTTCAGCTTCC
ELF1	hTFtarget	NC_037357.1:14356363-14358362	1923	1934	+	15.1447	3.53e-06	0.014	CGCTACGCCCCC
AR	hTFtarget	NC_037357.1:14356363-14358362	800	815	+	14.4394	3.59e-06	0.0139	GGCAGATTCTGTTCTG
ELF1	hTFtarget	NC_037357.1:14356363-14358362	1924	1935	-	15.3158	3.6e-06	0.0141	CGGGGGCGTAGC
ZBTB7A	hTFtarget	NC_037357.1:14356363-14358362	1927	1940	+	15.3182	3.62e-06	0.0143	ACGCCCCCGGCGCG
DUXA	database	NC_037357.1:14356363-14358362	1751	1763	+	14.91	3.62e-06	0.0144	CTAAGCTAATCAA
BRD4	hTFtarget	NC_037357.1:14356363-14358362	1922	1943	-	14.5325	3.69e-06	0.0145	TGGCGCGCCGGGGGCGTAGCGC
HSF1	hTFtarget	NC_037357.1:14356363-14358362	1925	1940	-	15.2105	3.7e-06	0.0146	CGCGCCGGGGGCGTAG
MYC	hTFtarget	NC_037357.1:14356363-14358362	1630	1645	-	14.4714	3.7e-06	0.0129	ACTCACACGCGCACCC
SPI1	hTFtarget	NC_037357.1:14356363-14358362	1919	1942	-	14.9868	3.75e-06	0.0147	GGCGCGCCGGGGGCGTAGCGCCTG
EGR1	hTFtarget	NC_037357.1:14356363-14358362	89	110	+	14.1923	3.83e-06	0.0146	GGGAAAGTGTATGTGGATGTAG
SPI1	hTFtarget	NC_037357.1:14356363-14358362	1924	1939	-	15.0658	3.89e-06	0.0154	GCGCCGGGGGCGTAGC
MAX	hTFtarget	NC_037357.1:14356363-14358362	1924	1935	+	15.4211	3.9e-06	0.0153	GCTACGCCCCCG
SUMO2/SUMO3	hTFtarget	NC_037357.1:14356363-14358362	1356	1371	-	14.8442	3.91e-06	0.013	TATGCATTGGCTTTCT
GATA1	database	NC_037357.1:14356363-14358362	661	675	+	12.1711	3.94e-06	0.0155	GGAGCAGATAAAACC
MXI1	hTFtarget	NC_037357.1:14356363-14358362	1923	1934	+	15.1447	3.94e-06	0.0156	CGCTACGCCCCC
ZNF274	hTFtarget	NC_037357.1:14356363-14358362	1455	1469	-	14.2286	3.94e-06	0.0155	CCTTTTCCACAGTCT
BCL6	database	NC_037357.1:14356363-14358362	654	663	+	14.3119	4.03e-06	0.016	GTTTCTAGGA
PRDM1	hTFtarget	NC_037357.1:14356363-14358362	84	98	+	15.2143	4.05e-06	0.0157	CAGGAGGGAAAGTGT
DUX4	hTFtarget	NC_037357.1:14356363-14358362	1750	1765	+	14.7727	4.11e-06	0.0161	GCTAAGCTAATCAATG
SMAD4	hTFtarget	NC_037357.1:14356363-14358362	1929	1940	-	14.7895	4.16e-06	0.0165	CGCGCCGGGGGC
FOXA1	hTFtarget	NC_037357.1:14356363-14358362	96	109	+	14.9851	4.17e-06	0.0166	TGTATGTGGATGTA
MAX	hTFtarget	NC_037357.1:14356363-14358362	1924	1935	+	15.2105	4.17e-06	0.0164	GCTACGCCCCCG
SPI1	hTFtarget	NC_037357.1:14356363-14358362	1919	1940	-	14.5	4.18e-06	0.0166	CGCGCCGGGGGCGTAGCGCCTG
EBF1	database	NC_037357.1:14356363-14358362	1446	1456	-	15.3404	4.22e-06	0.0167	CTCCCAAGGGA
KLF4	hTFtarget	NC_037357.1:14356363-14358362	1627	1642	-	14.6	4.23e-06	0.0167	CACACGCGCACCCCCA
POLR2A	hTFtarget	NC_037357.1:14356363-14358362	1984	1999	+	14.8684	4.25e-06	0.0168	GGCGCGAGGCGCCGGG
FLI1	hTFtarget	NC_037357.1:14356363-14358362	1946	1956	-	14.8	4.38e-06	0.0174	GCCGGAAGAGC
BCL3	hTFtarget	NC_037357.1:14356363-14358362	1627	1642	-	14.1389	4.38e-06	0.0173	CACACGCGCACCCCCA
BRD4	hTFtarget	NC_037357.1:14356363-14358362	756	777	+	14.8205	4.41e-06	0.0118	AAGGGAAGAGACACAGAATGAA
NOTCH1	hTFtarget	NC_037357.1:14356363-14358362	1925	1945	-	13.9079	4.42e-06	0.0174	ACTGGCGCGCCGGGGGCGTAG
RELA	hTFtarget	NC_037357.1:14356363-14358362	388	403	+	13.5897	4.42e-06	0.0169	AGTGGAAAGGGGATGA
EP300	hTFtarget	NC_037357.1:14356363-14358362	392	405	+	12.9714	4.47e-06	0.0172	GAAAGGGGATGAGA
PRDM1	hTFtarget	NC_037357.1:14356363-14358362	81	97	-	14.9286	4.49e-06	0.0174	CACTTTCCCTCCTGACT
USF2	hTFtarget	NC_037357.1:14356363-14358362	1923	1934	+	15.0395	4.5e-06	0.0177	CGCTACGCCCCC
BHLHE40	hTFtarget	NC_037357.1:14356363-14358362	1734	1745	-	12.9351	4.51e-06	0.017	AATGTTTGCTGA
EWSR1	hTFtarget	NC_037357.1:14356363-14358362	1655	1673	+	5.63636	4.57e-06	0.00858	GGAGTGAAGGATGGAGGCG
PR	database	NC_037357.1:14356363-14358362	794	820	+	15.0488	4.61e-06	0.0181	TTTATGGGCAGATTCTGTTCTGCTTCT
TBL1XR1	hTFtarget	NC_037357.1:14356363-14358362	747	762	-	14.6974	4.63e-06	0.0183	TTCCCTTCCCCCACTC
SP4	database	NC_037357.1:14356363-14358362	1928	1951	-	13.3434	4.64e-06	0.00906	AAGAGCACTGGCGCGCCGGGGGCG
SP4	database	NC_037357.1:14356363-14358362	1928	1951	-	13.3535	4.66e-06	0.00912	AAGAGCACTGGCGCGCCGGGGGCG
ETV4	hTFtarget	NC_037357.1:14356363-14358362	1627	1648	-	11.9759	4.7e-06	0.0185	GTAACTCACACGCGCACCCCCA
EWSR1	hTFtarget	NC_037357.1:14356363-14358362	80	95	+	3.01429	4.74e-06	0.018	AAGTCAGGAGGGAAAG
SP1	hTFtarget	NC_037357.1:14356363-14358362	1916	1937	-	14.2424	4.79e-06	0.0187	GCCGGGGGCGTAGCGCCTGACC
FOXA2	hTFtarget	NC_037357.1:14356363-14358362	750	761	+	14.8553	4.83e-06	0.0191	TGGGGGAAGGGA
TAF1	hTFtarget	NC_037357.1:14356363-14358362	749	772	+	14.6711	4.83e-06	0.0186	GTGGGGGAAGGGAAGAGACACAGA
E2F1	database	NC_037357.1:14356363-14358362	1982	1992	+	15.0164	4.88e-06	0.0194	TGGGCGCGAGG
FOXM1	hTFtarget	NC_037357.1:14356363-14358362	1258	1266	-	13.2597	4.91e-06	0.0188	GGTTTGAAA
CDK9	hTFtarget	NC_037357.1:14356363-14358362	1942	1957	-	15	4.93e-06	0.0195	CGCCGGAAGAGCACTG
EP300	hTFtarget	NC_037357.1:14356363-14358362	951	961	-	14.0132	4.96e-06	0.0195	AAATTCCAGAG
IKZF1	hTFtarget	NC_037357.1:14356363-14358362	753	768	-	14.3158	5.01e-06	0.0194	TGTCTCTTCCCTTCCC
ZBTB10	hTFtarget	NC_037357.1:14356363-14358362	1583	1598	-	14.6842	5.01e-06	0.0097	CAGAAAAGTAAAGAAG
SPI1	hTFtarget	NC_037357.1:14356363-14358362	1918	1939	-	14.4571	5.06e-06	0.02	GCGCCGGGGGCGTAGCGCCTGA
GTF2B	hTFtarget	NC_037357.1:14356363-14358362	1924	1935	+	14.9868	5.07e-06	0.02	GCTACGCCCCCG
SPI1	hTFtarget	NC_037357.1:14356363-14358362	1919	1934	+	14.5857	5.09e-06	0.02	CAGGCGCTACGCCCCC
AR	hTFtarget	NC_037357.1:14356363-14358362	800	815	-	14.2273	5.12e-06	0.02	CAGAACAGAATCTGCC
SPI1	hTFtarget	NC_037357.1:14356363-14358362	1922	1937	+	14.6571	5.13e-06	0.0202	GCGCTACGCCCCCGGC
USF1	hTFtarget	NC_037357.1:14356363-14358362	1923	1934	+	14.4868	5.15e-06	0.0204	CGCTACGCCCCC
ESR1	hTFtarget	NC_037357.1:14356363-14358362	755	776	+	13.9851	5.16e-06	0.0099	GAAGGGAAGAGACACAGAATGA
MYC	hTFtarget	NC_037357.1:14356363-14358362	1923	1934	+	14.6579	5.18e-06	0.0206	CGCTACGCCCCC
DEAF1	database	NC_037357.1:14356363-14358362	1936	1960	+	14.2424	5.32e-06	0.021	GCGCGCCAGTGCTCTTCCGGCGTGG
FLI1	hTFtarget	NC_037357.1:14356363-14358362	72	93	-	11.0303	5.33e-06	0.0202	TTCCCTCCTGACTTCTCTGTTT
MAX	hTFtarget	NC_037357.1:14356363-14358362	1923	1934	+	14.6974	5.35e-06	0.0212	CGCTACGCCCCC
FLI1	hTFtarget	NC_037357.1:14356363-14358362	80	95	+	14.2138	5.37e-06	0.0205	AAGTCAGGAGGGAAAG
SP1	hTFtarget	NC_037357.1:14356363-14358362	1924	1935	+	14.9143	5.4e-06	0.0212	GCTACGCCCCCG
NCOR1	hTFtarget	NC_037357.1:14356363-14358362	1957	1974	-	13.5152	5.42e-06	0.0215	CCGCGGAGCTTGCGCCAC
SPI1	hTFtarget	NC_037357.1:14356363-14358362	1924	1939	+	14.7857	5.43e-06	0.0212	GCTACGCCCCCGGCGC
EWSR1	hTFtarget	NC_037357.1:14356363-14358362	746	761	+	11.7857	5.45e-06	0.0147	GGAGTGGGGGAAGGGA
EOMES	hTFtarget	NC_037357.1:14356363-14358362	1136	1157	+	14.2121	5.47e-06	0.0215	ATTATCAGCTCTTTGAAGGCAA
POU5F1	hTFtarget	NC_037357.1:14356363-14358362	1978	1999	+	14.1974	5.48e-06	0.0181	GCAATGGGCGCGAGGCGCCGGG
ERG	hTFtarget	NC_037357.1:14356363-14358362	751	775	-	-11.3553	5.53e-06	0.0114	CATTCTGTGTCTCTTCCCTTCCCCC
EGR1	hTFtarget	NC_037357.1:14356363-14358362	1922	1937	-	14.2273	5.6e-06	0.0221	GCCGGGGGCGTAGCGC
FLI1	hTFtarget	NC_037357.1:14356363-14358362	79	94	-	-9.71212	5.62e-06	0.0215	TTTCCCTCCTGACTTC
GLIS2	database	NC_037357.1:14356363-14358362	1621	1634	+	14.0306	5.63e-06	0.0224	CTTTGTTGGGGGTG
SPI1	hTFtarget	NC_037357.1:14356363-14358362	1922	1937	+	14.7	5.66e-06	0.022	GCGCTACGCCCCCGGC
ZBTB17	hTFtarget	NC_037357.1:14356363-14358362	1932	1954	-	14.3816	5.69e-06	0.0224	CGGAAGAGCACTGGCGCGCCGGG
SPI1	hTFtarget	NC_037357.1:14356363-14358362	1662	1682	-	14.3714	5.77e-06	0.0114	CCCAAATTCCGCCTCCATCCT
MYC	hTFtarget	NC_037357.1:14356363-14358362	762	783	+	10.9737	5.8e-06	0.0226	AGAGACACAGAATGAATGAAGA
PDX1	database	NC_037357.1:14356363-14358362	423	434	-	13.1039	5.84e-06	0.0228	AGACATTAAATT
TRIM28	hTFtarget	NC_037357.1:14356363-14358362	392	405	+	11.4737	5.89e-06	0.0162	GAAAGGGGATGAGA
KLF9	hTFtarget	NC_037357.1:14356363-14358362	1919	1934	-	14.0286	5.98e-06	0.0236	GGGGGCGTAGCGCCTG
RFX2	hTFtarget	NC_037357.1:14356363-14358362	1924	1935	-	14.4605	5.99e-06	0.0235	CGGGGGCGTAGC
HOXB8	database	NC_037357.1:14356363-14358362	1226	1236	-	15.3222	6e-06	0.0235	TTGATTTATGA
TRIM28	hTFtarget	NC_037357.1:14356363-14358362	756	780	+	14.2436	6.02e-06	0.0232	AAGGGAAGAGACACAGAATGAATGA
AR	hTFtarget	NC_037357.1:14356363-14358362	800	815	+	14.5132	6.1e-06	0.0239	GGCAGATTCTGTTCTG
NR5A2	hTFtarget	NC_037357.1:14356363-14358362	1843	1864	+	14.3553	6.13e-06	0.024	AATGGACCAGAGAAAAACTCTC
ERG	hTFtarget	NC_037357.1:14356363-14358362	71	95	-	-11.8553	6.15e-06	0.0114	CTTTCCCTCCTGACTTCTCTGTTTC
TBP	hTFtarget	NC_037357.1:14356363-14358362	1923	1934	+	14.4079	6.18e-06	0.0246	CGCTACGCCCCC
FLI1	hTFtarget	NC_037357.1:14356363-14358362	1946	1956	+	14.5857	6.2e-06	0.0247	GCTCTTCCGGC
MLL	database	NC_037357.1:14356363-14358362	1925	1934	-	7.9596	6.21e-06	0.0247	GGGGGCGTAG
HNF1B	hTFtarget	NC_037357.1:14356363-14358362	726	741	+	14.3939	6.22e-06	0.0239	AGTTAATGAATAGCTG
NR2C2	hTFtarget	NC_037357.1:14356363-14358362	1944	1960	-	14.3571	6.23e-06	0.0247	CCACGCCGGAAGAGCAC
POU5F1	hTFtarget	NC_037357.1:14356363-14358362	1924	1939	+	14.4675	6.24e-06	0.0246	GCTACGCCCCCGGCGC
FLI1	hTFtarget	NC_037357.1:14356363-14358362	263	287	+	8.48485	6.31e-06	0.0196	AAGAAAGGAGTAGAAGCTGGGAGAG
ELF1	hTFtarget	NC_037357.1:14356363-14358362	1923	1934	+	14.3026	6.31e-06	0.0251	CGCTACGCCCCC
CTBP2	hTFtarget	NC_037357.1:14356363-14358362	751	766	+	14.3	6.35e-06	0.0123	GGGGGAAGGGAAGAGA
STAT5A	hTFtarget	NC_037357.1:14356363-14358362	1633	1644	-	14.4868	6.42e-06	0.0255	CTCACACGCGCA
E2F4	hTFtarget	NC_037357.1:14356363-14358362	1923	1934	-	14.4211	6.42e-06	0.0252	GGGGGCGTAGCG
ZBED6	database	NC_037357.1:14356363-14358362	1803	1814	+	14.2424	6.44e-06	0.0255	CAGGCTCGCACC
EPAS1	database	NC_037357.1:14356363-14358362	1630	1642	+	14.5413	6.45e-06	0.0257	GGGTGCGCGTGTG
EPAS1	database	NC_037357.1:14356363-14358362	1630	1642	-	14.5612	6.49e-06	0.0258	CACACGCGCACCC
FLI1	hTFtarget	NC_037357.1:14356363-14358362	1946	1956	-	14.5429	6.55e-06	0.026	GCCGGAAGAGC
EGR1	hTFtarget	NC_037357.1:14356363-14358362	1925	1940	+	14.2273	6.57e-06	0.026	CTACGCCCCCGGCGCG
SUMO2/SUMO3	hTFtarget	NC_037357.1:14356363-14358362	1893	1908	-	14.2338	6.59e-06	0.013	CTAGCAGCGGCTTTCC
SPI1	hTFtarget	NC_037357.1:14356363-14358362	1662	1686	-	13.9	6.63e-06	0.0261	CGCTCCCAAATTCCGCCTCCATCCT
MYC	hTFtarget	NC_037357.1:14356363-14358362	1628	1643	-	13.3857	6.65e-06	0.0129	TCACACGCGCACCCCC
SPI1	hTFtarget	NC_037357.1:14356363-14358362	1667	1682	+	14.3714	6.66e-06	0.0259	GGAGGCGGAATTTGGG
EBF1	hTFtarget	NC_037357.1:14356363-14358362	1443	1457	+	14.6364	6.74e-06	0.0267	ACCTCCCTTGGGAGA
EGR1	hTFtarget	NC_037357.1:14356363-14358362	1920	1941	+	13.7424	6.79e-06	0.0267	AGGCGCTACGCCCCCGGCGCGC
WT1	database	NC_037357.1:14356363-14358362	1924	1936	-	14.2472	6.82e-06	0.0271	CCGGGGGCGTAGC
EOMES	hTFtarget	NC_037357.1:14356363-14358362	1137	1157	-	14.0303	6.82e-06	0.0268	TTGCCTTCAAAGAGCTGATAA
WT1	database	NC_037357.1:14356363-14358362	1924	1936	-	14.2347	6.92e-06	0.0275	CCGGGGGCGTAGC
GTF2I	hTFtarget	NC_037357.1:14356363-14358362	909	930	-	13.6053	6.93e-06	0.0268	CCCTAGCTCAGGACCCCTGAAA
USF1	hTFtarget	NC_037357.1:14356363-14358362	1921	1936	+	13.9868	6.99e-06	0.0272	GGCGCTACGCCCCCGG
EGR1	database	NC_037357.1:14356363-14358362	1924	1937	+	14.3846	7.02e-06	0.0271	GCTACGCCCCCGGC
SPI1	hTFtarget	NC_037357.1:14356363-14358362	1921	1936	+	14.3286	7.02e-06	0.0277	GGCGCTACGCCCCCGG
HIF1A	hTFtarget	NC_037357.1:14356363-14358362	755	766	+	14.0649	7.07e-06	0.0273	GAAGGGAAGAGA
SETDB1	hTFtarget	NC_037357.1:14356363-14358362	289	307	+	12.3289	7.07e-06	0.0278	TGAAAACCTTCCCAGTTTG
ZBTB7A	hTFtarget	NC_037357.1:14356363-14358362	1925	1938	+	14.5	7.07e-06	0.0281	CTACGCCCCCGGCG
TRIM28	hTFtarget	NC_037357.1:14356363-14358362	531	546	-	12.4868	7.08e-06	0.0281	AGCAATACCTAGGCCT
BCL3	hTFtarget	NC_037357.1:14356363-14358362	1629	1643	-	13.5286	7.13e-06	0.0282	TCACACGCGCACCCC
MED1	hTFtarget	NC_037357.1:14356363-14358362	1959	1973	-	13.9857	7.14e-06	0.0283	CGCGGAGCTTGCGCC
REST	hTFtarget	NC_037357.1:14356363-14358362	1969	1993	+	13.6364	7.14e-06	0.0165	CCGCGGCAAGCAATGGGCGCGAGGC
PBX1	hTFtarget	NC_037357.1:14356363-14358362	1447	1455	+	14.5526	7.18e-06	0.0286	CCCTTGGGA
IRF3	hTFtarget	NC_037357.1:14356363-14358362	71	95	+	13.0385	7.2e-06	0.0188	GAAACAGAGAAGTCAGGAGGGAAAG
SPI1	hTFtarget	NC_037357.1:14356363-14358362	1923	1934	+	14.3857	7.2e-06	0.0281	CGCTACGCCCCC
ESR1	hTFtarget	NC_037357.1:14356363-14358362	746	770	+	13.5672	7.3e-06	0.00958	GGAGTGGGGGAAGGGAAGAGACACA
BRCA1	hTFtarget	NC_037357.1:14356363-14358362	95	103	-	14.8553	7.34e-06	0.0286	CACATACAC
PBX1	hTFtarget	NC_037357.1:14356363-14358362	1598	1608	-	14.2	7.41e-06	0.0293	AGAGTGACGGC
MXI1	hTFtarget	NC_037357.1:14356363-14358362	1963	1978	-	14.2368	7.42e-06	0.0295	CTTGCCGCGGAGCTTG
STAT2	hTFtarget	NC_037357.1:14356363-14358362	751	762	-	14.2105	7.43e-06	0.0209	TTCCCTTCCCCC
E2F1	hTFtarget	NC_037357.1:14356363-14358362	1985	2000	+	14.0909	7.43e-06	0.0157	GCGCGAGGCGCCGGGA
SPI1	hTFtarget	NC_037357.1:14356363-14358362	1667	1682	-	14.2429	7.46e-06	0.0292	CCCAAATTCCGCCTCC
SPI1	hTFtarget	NC_037357.1:14356363-14358362	1915	1936	+	13.7571	7.46e-06	0.0215	TGGTCAGGCGCTACGCCCCCGG
SMAD1	hTFtarget	NC_037357.1:14356363-14358362	1928	1939	+	13.8684	7.53e-06	0.0299	CGCCCCCGGCGC
PAX3	hTFtarget	NC_037357.1:14356363-14358362	13	24	+	14.3947	7.56e-06	0.0182	AGCATGACATCC
CEBPB	hTFtarget	NC_037357.1:14356363-14358362	1954	1969	-	14.1818	7.56e-06	0.0297	GAGCTTGCGCCACGCC
ELF3	database	NC_037357.1:14356363-14358362	1115	1128	-	14.5	7.66e-06	0.0304	AGCATACAGGATAT
BCL6	hTFtarget	NC_037357.1:14356363-14358362	1446	1454	-	14.2105	7.67e-06	0.0304	CCCAAGGGA
ELF1	hTFtarget	NC_037357.1:14356363-14358362	1947	1955	+	14.4342	7.67e-06	0.0304	CTCTTCCGG
PRDM1	database	NC_037357.1:14356363-14358362	85	98	+	13.7191	7.68e-06	0.0301	AGGAGGGAAAGTGT
SPI1	hTFtarget	NC_037357.1:14356363-14358362	1666	1681	-	14.5132	7.68e-06	0.03	CCAAATTCCGCCTCCA
E2F4	hTFtarget	NC_037357.1:14356363-14358362	1923	1934	-	14.1579	7.68e-06	0.0302	GGGGGCGTAGCG
NR2C2	hTFtarget	NC_037357.1:14356363-14358362	1947	1962	+	13.8684	7.71e-06	0.0306	CTCTTCCGGCGTGGCG
ELF3	database	NC_037357.1:14356363-14358362	1115	1128	-	14.4898	7.73e-06	0.0307	AGCATACAGGATAT
PRKDC	hTFtarget	NC_037357.1:14356363-14358362	1301	1312	-	14.2105	7.74e-06	0.0305	TCCATTTTATAG
EP300	hTFtarget	NC_037357.1:14356363-14358362	264	288	+	13.6974	7.74e-06	0.0172	AGAAAGGAGTAGAAGCTGGGAGAGC
BRD4	hTFtarget	NC_037357.1:14356363-14358362	752	773	+	14.0513	7.75e-06	0.0118	GGGGAAGGGAAGAGACACAGAA
JUND	hTFtarget	NC_037357.1:14356363-14358362	1953	1974	-	13.4211	7.83e-06	0.0181	CCGCGGAGCTTGCGCCACGCCG
VDR	database	NC_037357.1:14356363-14358362	204	215	+	12.3168	7.87e-06	0.0313	CCCACTGAACCT
IRF5	hTFtarget	NC_037357.1:14356363-14358362	924	935	+	13.8553	7.87e-06	0.0311	GCTAGGGCTACA
SPI1	hTFtarget	NC_037357.1:14356363-14358362	1921	1936	-	14.0857	7.89e-06	0.0307	CCGGGGGCGTAGCGCC
JUND	hTFtarget	NC_037357.1:14356363-14358362	1132	1143	-	14.4342	7.9e-06	0.0304	CTGATAATATCA
E2F1	hTFtarget	NC_037357.1:14356363-14358362	1978	1993	+	14.0152	7.94e-06	0.0157	GCAATGGGCGCGAGGC
PRDM1	database	NC_037357.1:14356363-14358362	85	98	+	13.7245	7.94e-06	0.031	AGGAGGGAAAGTGT
SP1	database	NC_037357.1:14356363-14358362	1921	1939	-	13.8427	7.98e-06	0.0309	GCGCCGGGGGCGTAGCGCC
SPI1	hTFtarget	NC_037357.1:14356363-14358362	1667	1682	-	14.0286	7.99e-06	0.0313	CCCAAATTCCGCCTCC
SPI1	hTFtarget	NC_037357.1:14356363-14358362	1667	1682	+	14.0395	8.05e-06	0.0318	GGAGGCGGAATTTGGG
ZEB1	database	NC_037357.1:14356363-14358362	69	77	-	11.6422	8.06e-06	0.0321	CTGTTTCAG
MYB	hTFtarget	NC_037357.1:14356363-14358362	1525	1533	-	11.6429	8.06e-06	0.031	CAACTGACA
SPI1	hTFtarget	NC_037357.1:14356363-14358362	1958	1973	-	14.0526	8.15e-06	0.0323	CGCGGAGCTTGCGCCA
TFAP2D	database	NC_037357.1:14356363-14358362	1928	1941	+	13.1626	8.16e-06	0.0324	CGCCCCCGGCGCGC
KLF9	hTFtarget	NC_037357.1:14356363-14358362	1923	1938	-	13.2273	8.16e-06	0.0323	CGCCGGGGGCGTAGCG
RELA	hTFtarget	NC_037357.1:14356363-14358362	752	767	-	14.0658	8.16e-06	0.0306	GTCTCTTCCCTTCCCC
STAT5A	hTFtarget	NC_037357.1:14356363-14358362	1633	1644	-	13.7632	8.17e-06	0.0324	CTCACACGCGCA
GTF2I	hTFtarget	NC_037357.1:14356363-14358362	1293	1312	+	10.4737	8.18e-06	0.0323	AGTTTCTTCTATAAAATGGA
EP300	hTFtarget	NC_037357.1:14356363-14358362	749	764	-	13.6286	8.18e-06	0.0312	TCTTCCCTTCCCCCAC
EPAS1	hTFtarget	NC_037357.1:14356363-14358362	1631	1642	-	14.1711	8.19e-06	0.0325	CACACGCGCACC
PCGF2	hTFtarget	NC_037357.1:14356363-14358362	752	773	-	13.9211	8.23e-06	0.0322	TTCTGTGTCTCTTCCCTTCCCC
BRD4	hTFtarget	NC_037357.1:14356363-14358362	747	768	-	13.7792	8.24e-06	0.00623	TGTCTCTTCCCTTCCCCCACTC
SPI1	hTFtarget	NC_037357.1:14356363-14358362	1667	1682	+	13.8421	8.24e-06	0.0326	GGAGGCGGAATTTGGG
HOXB7	database	NC_037357.1:14356363-14358362	1227	1236	-	15.1444	8.27e-06	0.0326	TTGATTTATG
SPI1	hTFtarget	NC_037357.1:14356363-14358362	1913	1937	+	13	8.27e-06	0.0236	AGTGGTCAGGCGCTACGCCCCCGGC
IRF1	hTFtarget	NC_037357.1:14356363-14358362	1923	1934	+	14.2	8.3e-06	0.0327	CGCTACGCCCCC
SP4	hTFtarget	NC_037357.1:14356363-14358362	1923	1934	+	13.8	8.31e-06	0.0329	CGCTACGCCCCC
SPI1	hTFtarget	NC_037357.1:14356363-14358362	1667	1682	+	14.0429	8.41e-06	0.0278	GGAGGCGGAATTTGGG
SRF	hTFtarget	NC_037357.1:14356363-14358362	1971	1992	-	12.9211	8.42e-06	0.0101	CCTCGCGCCCATTGCTTGCCGC
SETDB1	hTFtarget	NC_037357.1:14356363-14358362	1309	1324	-	12.8947	8.43e-06	0.0321	ACAATTACTCTCTCCA
ZNF92	hTFtarget	NC_037357.1:14356363-14358362	1295	1310	-	13.75	8.43e-06	0.0332	CATTTTATAGAAGAAA
EWSR1	hTFtarget	NC_037357.1:14356363-14358362	78	93	+	10.7714	8.44e-06	0.0147	AGAAGTCAGGAGGGAA
TRIM28	hTFtarget	NC_037357.1:14356363-14358362	1721	1734	-	10.4868	8.44e-06	0.0162	AATTAAGACTGAAA
ZFP42	hTFtarget	NC_037357.1:14356363-14358362	1924	1935	-	13.9474	8.48e-06	0.0329	CGGGGGCGTAGC
ZBTB10	hTFtarget	NC_037357.1:14356363-14358362	751	766	+	13.9342	8.49e-06	0.011	GGGGGAAGGGAAGAGA
BRD3	hTFtarget	NC_037357.1:14356363-14358362	1959	1974	-	13.6053	8.56e-06	0.0339	CCGCGGAGCTTGCGCC
USF2	hTFtarget	NC_037357.1:14356363-14358362	1924	1935	+	13.9474	8.57e-06	0.034	GCTACGCCCCCG
MAZ	hTFtarget	NC_037357.1:14356363-14358362	751	766	-	13.961	8.58e-06	0.0303	TCTCTTCCCTTCCCCC
SPI1	hTFtarget	NC_037357.1:14356363-14358362	1924	1935	-	14.2143	8.6e-06	0.0337	CGGGGGCGTAGC
POLR2A	hTFtarget	NC_037357.1:14356363-14358362	1924	1939	-	13.1184	8.61e-06	0.0339	GCGCCGGGGGCGTAGC
AR	hTFtarget	NC_037357.1:14356363-14358362	800	815	+	13.9857	8.62e-06	0.0341	GGCAGATTCTGTTCTG
ZNF263	database	NC_037357.1:14356363-14358362	266	286	+	13.3878	8.64e-06	0.0325	AAAGGAGTAGAAGCTGGGAGA
STAT3	hTFtarget	NC_037357.1:14356363-14358362	1978	1999	+	13.8312	8.67e-06	0.0343	GCAATGGGCGCGAGGCGCCGGG
CCNT2	hTFtarget	NC_037357.1:14356363-14358362	656	671	-	13.4857	8.67e-06	0.0344	TTATCTGCTCCTAGAA
SPI1	hTFtarget	NC_037357.1:14356363-14358362	1663	1683	-	13.9079	8.71e-06	0.0341	TCCCAAATTCCGCCTCCATCC
SPI1	hTFtarget	NC_037357.1:14356363-14358362	1923	1934	+	14.1857	8.76e-06	0.0345	CGCTACGCCCCC
EP300	hTFtarget	NC_037357.1:14356363-14358362	1946	1970	-	13.4868	8.78e-06	0.0172	GGAGCTTGCGCCACGCCGGAAGAGC
NRF1	hTFtarget	NC_037357.1:14356363-14358362	1960	1971	-	13.8714	8.8e-06	0.035	CGGAGCTTGCGC
SPI1	hTFtarget	NC_037357.1:14356363-14358362	1936	1947	+	13.8289	8.84e-06	0.0352	GCGCGCCAGTGC
TCF12	hTFtarget	NC_037357.1:14356363-14358362	1757	1774	+	13.5909	8.84e-06	0.0345	TAATCAATGCCAGGTGTC
NCOR2	hTFtarget	NC_037357.1:14356363-14358362	1445	1456	+	13.9605	8.9e-06	0.0354	CTCCCTTGGGAG
SPI1	hTFtarget	NC_037357.1:14356363-14358362	1919	1934	-	13.7429	8.92e-06	0.0287	GGGGGCGTAGCGCCTG
FLI1	hTFtarget	NC_037357.1:14356363-14358362	1654	1669	+	8	8.93e-06	0.0341	GGGAGTGAAGGATGGA
TEAD4	hTFtarget	NC_037357.1:14356363-14358362	953	961	-	14.1184	8.94e-06	0.035	AAATTCCAG
STAT1	hTFtarget	NC_037357.1:14356363-14358362	960	977	-	11.5195	8.96e-06	0.0349	GCATGGTCTAAAAGTAAA
STAT1	hTFtarget	NC_037357.1:14356363-14358362	960	977	-	11.5195	8.96e-06	0.0349	GCATGGTCTAAAAGTAAA
HCFC1	hTFtarget	NC_037357.1:14356363-14358362	1964	1975	+	14.3816	8.97e-06	0.0356	AAGCTCCGCGGC
GABPA	hTFtarget	NC_037357.1:14356363-14358362	1947	1958	+	13.6143	8.98e-06	0.0357	CTCTTCCGGCGT
UBTF	hTFtarget	NC_037357.1:14356363-14358362	1667	1675	+	13.0833	9.01e-06	0.0353	GGAGGCGGA
SPI1	hTFtarget	NC_037357.1:14356363-14358362	1667	1682	+	13.8286	9.08e-06	0.0355	GGAGGCGGAATTTGGG
FOXA2	hTFtarget	NC_037357.1:14356363-14358362	1734	1743	-	13.5921	9.14e-06	0.0359	TGTTTGCTGA
BRD3	hTFtarget	NC_037357.1:14356363-14358362	1627	1642	-	12.5634	9.17e-06	0.0364	CACACGCGCACCCCCA
PAX3	hTFtarget	NC_037357.1:14356363-14358362	556	567	-	14.1711	9.18e-06	0.0182	ACTATGAAATTA
PGR	hTFtarget	NC_037357.1:14356363-14358362	799	814	-	13.1061	9.19e-06	0.0358	AGAACAGAATCTGCCC
BRD3	hTFtarget	NC_037357.1:14356363-14358362	1629	1644	-	13.194	9.19e-06	0.0364	CTCACACGCGCACCCC
AR	hTFtarget	NC_037357.1:14356363-14358362	800	815	+	13.6818	9.19e-06	0.036	GGCAGATTCTGTTCTG
BHLHE40	hTFtarget	NC_037357.1:14356363-14358362	1924	1938	+	13.2632	9.24e-06	0.0362	GCTACGCCCCCGGCG
POU5F1	hTFtarget	NC_037357.1:14356363-14358362	1953	1974	+	13.3553	9.25e-06	0.0181	CGGCGTGGCGCAAGCTCCGCGG
PPARA	database	NC_037357.1:14356363-14358362	43	59	+	13.6531	9.27e-06	0.0363	AACAAGGAAAATGGTGA
RB1	hTFtarget	NC_037357.1:14356363-14358362	1924	1935	-	14.0132	9.27e-06	0.0365	CGGGGGCGTAGC
JUND	hTFtarget	NC_037357.1:14356363-14358362	1971	1992	-	13.1053	9.3e-06	0.0181	CCTCGCGCCCATTGCTTGCCGC
CBFB	hTFtarget	NC_037357.1:14356363-14358362	1946	1957	+	14.1842	9.3e-06	0.0366	GCTCTTCCGGCG
ELF2	hTFtarget	NC_037357.1:14356363-14358362	1947	1958	-	14.0143	9.33e-06	0.037	ACGCCGGAAGAG
BRD4	hTFtarget	NC_037357.1:14356363-14358362	750	771	+	13.7821	9.36e-06	0.0118	TGGGGGAAGGGAAGAGACACAG
AR	database	NC_037357.1:14356363-14358362	834	848	-	13.9775	9.4e-06	0.0299	GGTTCACCATGTACC
SPI1	hTFtarget	NC_037357.1:14356363-14358362	1922	1937	+	13.9857	9.4e-06	0.0365	GCGCTACGCCCCCGGC
ZBTB17	hTFtarget	NC_037357.1:14356363-14358362	1389	1404	+	12.0143	9.43e-06	0.0374	AATTTAGTATTGTCTG
MYC	hTFtarget	NC_037357.1:14356363-14358362	1923	1934	+	14.0658	9.49e-06	0.0373	CGCTACGCCCCC
SPI1	hTFtarget	NC_037357.1:14356363-14358362	1666	1683	+	13.6974	9.64e-06	0.038	TGGAGGCGGAATTTGGGA
LEF1:TCF1	database	NC_037357.1:14356363-14358362	1281	1291	+	13.8788	9.65e-06	0.038	CCTTTGAACCT
EP300	hTFtarget	NC_037357.1:14356363-14358362	1945	1956	-	14.25	9.67e-06	0.0378	GCCGGAAGAGCA
EP300	hTFtarget	NC_037357.1:14356363-14358362	86	101	-	13.6197	9.69e-06	0.0375	CATACACTTTCCCTCC
SPI1	hTFtarget	NC_037357.1:14356363-14358362	1919	1934	+	13.4286	9.74e-06	0.0341	CAGGCGCTACGCCCCC
SP1	database	NC_037357.1:14356363-14358362	751	760	-	14.0337	9.75e-06	0.0378	CCCTTCCCCC
ELF1	hTFtarget	NC_037357.1:14356363-14358362	1946	1957	-	14.2429	9.76e-06	0.0387	CGCCGGAAGAGC
HCFC1	hTFtarget	NC_037357.1:14356363-14358362	1946	1956	+	14.2895	9.79e-06	0.0388	GCTCTTCCGGC
AR	hTFtarget	NC_037357.1:14356363-14358362	799	814	+	13.5	9.83e-06	0.0381	GGGCAGATTCTGTTCT
CREB1	hTFtarget	NC_037357.1:14356363-14358362	759	783	-	13.2568	9.93e-06	0.0116	TCTTCATTCATTCTGTGTCTCTTCC
MYC	hTFtarget	NC_037357.1:14356363-14358362	753	768	+	13.5395	9.94e-06	0.0382	GGGAAGGGAAGAGACA
SP3	database	NC_037357.1:14356363-14358362	1919	1938	-	13.5688	9.95e-06	0.039	CGCCGGGGGCGTAGCGCCTG
IRF5	hTFtarget	NC_037357.1:14356363-14358362	1452	1470	-	10.2895	9.98e-06	0.0193	CCCTTTTCCACAGTCTCCC
FOXO3	hTFtarget	NC_037357.1:14356363-14358362	94	118	-	0.552632	1e-05	0.0378	ACACCACACTACATCCACATACACT
NRF1	hTFtarget	NC_037357.1:14356363-14358362	1960	1975	+	13.4737	1e-05	0.0398	GCGCAAGCTCCGCGGC
SRF	hTFtarget	NC_037357.1:14356363-14358362	1921	1942	+	12.5789	1e-05	0.0101	GGCGCTACGCCCCCGGCGCGCC
TCF4	hTFtarget	NC_037357.1:14356363-14358362	1280	1294	-	14.0455	1e-05	0.0395	CTGAGGTTCAAAGGA
AR	hTFtarget	NC_037357.1:14356363-14358362	800	814	+	13.7879	1e-05	0.0396	GGCAGATTCTGTTCT
SP7	database	NC_037357.1:14356363-14358362	1919	1938	-	13.5229	1e-05	0.0393	CGCCGGGGGCGTAGCGCCTG
ESR1	hTFtarget	NC_037357.1:14356363-14358362	742	766	+	13.0448	1.01e-05	0.00958	GGTTGGAGTGGGGGAAGGGAAGAGA
ETS1	hTFtarget	NC_037357.1:14356363-14358362	76	97	+	13.5132	1.01e-05	0.0395	AGAGAAGTCAGGAGGGAAAGTG
IRF3	hTFtarget	NC_037357.1:14356363-14358362	749	773	+	12.3205	1.01e-05	0.0188	GTGGGGGAAGGGAAGAGACACAGAA
ERG	hTFtarget	NC_037357.1:14356363-14358362	752	763	-	13.9737	1.01e-05	0.0379	CTTCCCTTCCCC
EBF1	database	NC_037357.1:14356363-14358362	1446	1455	-	13.8989	1.02e-05	0.0407	TCCCAAGGGA
ESR1	hTFtarget	NC_037357.1:14356363-14358362	752	776	+	13.0299	1.02e-05	0.00958	GGGGAAGGGAAGAGACACAGAATGA
SPI1	hTFtarget	NC_037357.1:14356363-14358362	1920	1935	+	13.5	1.02e-05	0.0399	AGGCGCTACGCCCCCG
SRF	hTFtarget	NC_037357.1:14356363-14358362	1921	1942	-	12.5395	1.02e-05	0.0101	GGCGCGCCGGGGGCGTAGCGCC
GATA2	hTFtarget	NC_037357.1:14356363-14358362	655	673	+	13.1818	1.03e-05	0.0409	TTTCTAGGAGCAGATAAAA
NCOR1	hTFtarget	NC_037357.1:14356363-14358362	1627	1642	+	13.6974	1.03e-05	0.0408	TGGGGGTGCGCGTGTG
SUMO2	hTFtarget	NC_037357.1:14356363-14358362	1547	1566	-	12.8052	1.03e-05	0.0403	ATTTTTTTTCTCTCTCAAAT
ZFP42	hTFtarget	NC_037357.1:14356363-14358362	1925	1941	-	13.2368	1.03e-05	0.0408	GCGCGCCGGGGGCGTAG
SUZ12	hTFtarget	NC_037357.1:14356363-14358362	1947	1955	+	13.9737	1.04e-05	0.0411	CTCTTCCGG
TP53	hTFtarget	NC_037357.1:14356363-14358362	753	771	+	7.6338	1.04e-05	0.0406	GGGAAGGGAAGAGACACAG
CREB1	hTFtarget	NC_037357.1:14356363-14358362	1947	1955	+	14.1842	1.04e-05	0.0412	CTCTTCCGG
GABPA	hTFtarget	NC_037357.1:14356363-14358362	1946	1957	+	14.0152	1.05e-05	0.0419	GCTCTTCCGGCG
SPI1	hTFtarget	NC_037357.1:14356363-14358362	1924	1935	-	13.9143	1.05e-05	0.0413	CGGGGGCGTAGC
SPI1	hTFtarget	NC_037357.1:14356363-14358362	1667	1682	+	13.7143	1.05e-05	0.0308	GGAGGCGGAATTTGGG
SUMO2	hTFtarget	NC_037357.1:14356363-14358362	467	488	-	12.6786	1.05e-05	0.0409	GTAAGACCAACCAAATAATAGA
ERG	hTFtarget	NC_037357.1:14356363-14358362	1946	1956	-	14.0286	1.05e-05	0.0418	GCCGGAAGAGC
FLI1	hTFtarget	NC_037357.1:14356363-14358362	752	776	+	7.12121	1.06e-05	0.0196	GGGGAAGGGAAGAGACACAGAATGA
EWSR1	hTFtarget	NC_037357.1:14356363-14358362	753	777	+	-7.65152	1.06e-05	0.0234	GGGAAGGGAAGAGACACAGAATGAA
ZBTB7B	hTFtarget	NC_037357.1:14356363-14358362	1923	1934	+	13.4868	1.06e-05	0.042	CGCTACGCCCCC
ERG	hTFtarget	NC_037357.1:14356363-14358362	80	95	-	13.0921	1.06e-05	0.0373	CTTTCCCTCCTGACTT
KLF16	database	NC_037357.1:14356363-14358362	1924	1934	-	13.8469	1.06e-05	0.0422	GGGGGCGTAGC
GABPA	database	NC_037357.1:14356363-14358362	1946	1958	-	14	1.07e-05	0.0423	ACGCCGGAAGAGC
ESR1	hTFtarget	NC_037357.1:14356363-14358362	745	766	+	12.7463	1.07e-05	0.0137	TGGAGTGGGGGAAGGGAAGAGA
GTF2I	hTFtarget	NC_037357.1:14356363-14358362	1274	1295	+	12.6053	1.07e-05	0.0416	TTTAACTCCTTTGAACCTCAGT
STAT2	hTFtarget	NC_037357.1:14356363-14358362	750	761	-	13.8158	1.07e-05	0.0209	TCCCTTCCCCCA
TP53	hTFtarget	NC_037357.1:14356363-14358362	443	464	+	13.2706	1.07e-05	0.0418	GACCAGAGTTTGCCATCCCAGG
ZFP42	hTFtarget	NC_037357.1:14356363-14358362	1924	1934	+	13.2895	1.07e-05	0.0415	GCTACGCCCCC
PIAS1	hTFtarget	NC_037357.1:14356363-14358362	799	814	-	13.3939	1.08e-05	0.0425	AGAACAGAATCTGCCC
SPI1	hTFtarget	NC_037357.1:14356363-14358362	680	691	-	13.8553	1.08e-05	0.0428	TGACAGATTGCA
E2F1	hTFtarget	NC_037357.1:14356363-14358362	1922	1933	-	13.0395	1.08e-05	0.0428	GGGGCGTAGCGC
EP300	hTFtarget	NC_037357.1:14356363-14358362	1721	1734	-	10.8429	1.08e-05	0.0208	AATTAAGACTGAAA
GABPA	database	NC_037357.1:14356363-14358362	1946	1958	-	13.9694	1.08e-05	0.0428	ACGCCGGAAGAGC
SMAD2:SMAD3:SMAD4	database	NC_037357.1:14356363-14358362	1803	1815	+	13.8197	1.09e-05	0.0434	CAGGCTCGCACCC
GATA3	hTFtarget	NC_037357.1:14356363-14358362	665	673	+	13.3947	1.09e-05	0.0431	CAGATAAAA
TCF7L2	hTFtarget	NC_037357.1:14356363-14358362	1280	1291	+	13.6364	1.09e-05	0.0431	TCCTTTGAACCT
ELF1	hTFtarget	NC_037357.1:14356363-14358362	1946	1959	+	13.9394	1.09e-05	0.0433	GCTCTTCCGGCGTG
PGR	hTFtarget	NC_037357.1:14356363-14358362	799	814	+	12.9552	1.1e-05	0.0432	GGGCAGATTCTGTTCT
SPI1	hTFtarget	NC_037357.1:14356363-14358362	1665	1686	-	13.0571	1.1e-05	0.0215	CGCTCCCAAATTCCGCCTCCAT
TRIM28	hTFtarget	NC_037357.1:14356363-14358362	881	892	-	13.6711	1.1e-05	0.0431	AGTACTTTGATG
ELK3	hTFtarget	NC_037357.1:14356363-14358362	1947	1957	+	13.9545	1.1e-05	0.0436	CTCTTCCGGCG
GATA1	hTFtarget	NC_037357.1:14356363-14358362	656	671	-	12.3333	1.11e-05	0.0436	TTATCTGCTCCTAGAA
CREB1	hTFtarget	NC_037357.1:14356363-14358362	746	770	+	-3.0303	1.11e-05	0.0222	GGAGTGGGGGAAGGGAAGAGACACA
PKNOX2	database	NC_037357.1:14356363-14358362	1764	1775	-	9.89796	1.11e-05	0.0436	CGACACCTGGCA
ETV1	hTFtarget	NC_037357.1:14356363-14358362	1946	1957	+	13.9394	1.12e-05	0.0446	GCTCTTCCGGCG
GATA3	hTFtarget	NC_037357.1:14356363-14358362	1734	1743	+	13.4545	1.12e-05	0.0436	TCAGCAAACA
NR2C2	hTFtarget	NC_037357.1:14356363-14358362	1944	1959	+	13.3143	1.12e-05	0.0446	GTGCTCTTCCGGCGTG
RCOR1	hTFtarget	NC_037357.1:14356363-14358362	1291	1312	+	8.97368	1.12e-05	0.0444	TCAGTTTCTTCTATAAAATGGA
PALB2	hTFtarget	NC_037357.1:14356363-14358362	1087	1102	-	13.7143	1.13e-05	0.0441	GATTTCACTCCAGAAA
POLR2A	hTFtarget	NC_037357.1:14356363-14358362	1921	1940	+	12.3902	1.13e-05	0.044	GGCGCTACGCCCCCGGCGCG
SPI1	hTFtarget	NC_037357.1:14356363-14358362	1919	1934	-	13.2429	1.13e-05	0.0441	GGGGGCGTAGCGCCTG
STAT3	hTFtarget	NC_037357.1:14356363-14358362	737	758	-	13.2857	1.13e-05	0.0446	CTTCCCCCACTCCAACCCAGCT
USF2	hTFtarget	NC_037357.1:14356363-14358362	1924	1935	-	13.7	1.13e-05	0.0445	CGGGGGCGTAGC
POU3F3	database	NC_037357.1:14356363-14358362	1365	1376	-	11.6755	1.13e-05	0.0357	ATTCATATGCAT
TFAP2D	database	NC_037357.1:14356363-14358362	1928	1941	-	11.3673	1.13e-05	0.0447	GCGCGCCGGGGGCG
RREB1	database	NC_037357.1:14356363-14358362	741	754	-	12.0367	1.14e-05	0.045	CCCCACTCCAACCC
SPI1	hTFtarget	NC_037357.1:14356363-14358362	1960	1971	-	13.6711	1.14e-05	0.0452	CGGAGCTTGCGC
CREB1	hTFtarget	NC_037357.1:14356363-14358362	748	772	+	-3.12121	1.14e-05	0.0222	AGTGGGGGAAGGGAAGAGACACAGA
EP300	hTFtarget	NC_037357.1:14356363-14358362	1732	1743	+	13.5325	1.14e-05	0.0449	ATTCAGCAAACA
SETDB1	hTFtarget	NC_037357.1:14356363-14358362	254	275	-	11.1974	1.15e-05	0.0447	CTACTCCTTTCTTCACCAGTAA
HMGA1	database	NC_037357.1:14356363-14358362	183	197	+	11.6373	1.16e-05	0.0455	CCGTCAATTTCCTTA
ERG	hTFtarget	NC_037357.1:14356363-14358362	1946	1956	-	13.7286	1.16e-05	0.046	GCCGGAAGAGC
SREBF1	hTFtarget	NC_037357.1:14356363-14358362	1923	1934	+	13.2895	1.16e-05	0.0462	CGCTACGCCCCC
XBP1	hTFtarget	NC_037357.1:14356363-14358362	1976	1995	+	13.3553	1.16e-05	0.0461	AAGCAATGGGCGCGAGGCGC
CTNNB1	hTFtarget	NC_037357.1:14356363-14358362	1281	1291	-	14.0141	1.16e-05	0.0457	AGGTTCAAAGG
EOMES	hTFtarget	NC_037357.1:14356363-14358362	1041	1062	+	13.3485	1.16e-05	0.0229	ATTCACACACTATTATGTCACC
BCL6	database	NC_037357.1:14356363-14358362	649	664	-	12.899	1.16e-05	0.0453	CTCCTAGAAACCTTAG
E2F1	database	NC_037357.1:14356363-14358362	1980	1993	+	13.25	1.17e-05	0.0463	AATGGGCGCGAGGC
SPI1	hTFtarget	NC_037357.1:14356363-14358362	1627	1638	-	13.2763	1.17e-05	0.0465	CGCGCACCCCCA
E2F4	hTFtarget	NC_037357.1:14356363-14358362	1923	1934	+	13.5921	1.17e-05	0.0463	CGCTACGCCCCC
SPI1	hTFtarget	NC_037357.1:14356363-14358362	1920	1935	+	13.6143	1.18e-05	0.0462	AGGCGCTACGCCCCCG
SPI1	hTFtarget	NC_037357.1:14356363-14358362	1959	1973	-	13.3158	1.18e-05	0.0469	CGCGGAGCTTGCGCC
E2F1	database	NC_037357.1:14356363-14358362	1980	1993	+	13.1935	1.18e-05	0.0466	AATGGGCGCGAGGC
BCL6	database	NC_037357.1:14356363-14358362	649	664	+	12.8778	1.19e-05	0.0465	CTAAGGTTTCTAGGAG
ZNF274	hTFtarget	NC_037357.1:14356363-14358362	1456	1470	+	11.5857	1.19e-05	0.0473	GACTGTGGAAAAGGG
TFCP2	database	NC_037357.1:14356363-14358362	1791	1806	+	13.3878	1.2e-05	0.047	TCCTGAACAGACCAGG
MED1	hTFtarget	NC_037357.1:14356363-14358362	753	768	-	13.5455	1.2e-05	0.0466	TGTCTCTTCCCTTCCC
ETS1	hTFtarget	NC_037357.1:14356363-14358362	1949	1957	+	13.5658	1.21e-05	0.0481	CTTCCGGCG
HDAC2	hTFtarget	NC_037357.1:14356363-14358362	1952	1973	-	12.0921	1.21e-05	0.0474	CGCGGAGCTTGCGCCACGCCGG
ATF1	hTFtarget	NC_037357.1:14356363-14358362	1948	1956	-	13.7237	1.21e-05	0.0477	GCCGGAAGA
NR2C2	hTFtarget	NC_037357.1:14356363-14358362	1944	1959	+	13.1857	1.21e-05	0.0482	GTGCTCTTCCGGCGTG
REST	hTFtarget	NC_037357.1:14356363-14358362	1932	1956	-	12.7143	1.21e-05	0.0165	GCCGGAAGAGCACTGGCGCGCCGGG
SPI1	hTFtarget	NC_037357.1:14356363-14358362	1664	1688	-	12.2429	1.21e-05	0.0236	TTCGCTCCCAAATTCCGCCTCCATC
ERG	hTFtarget	NC_037357.1:14356363-14358362	1627	1638	+	12.3684	1.21e-05	0.0481	TGGGGGTGCGCG
EGR1	database	NC_037357.1:14356363-14358362	1927	1937	-	13.4483	1.22e-05	0.0486	GCCGGGGGCGT
ARRB1	hTFtarget	NC_037357.1:14356363-14358362	1946	1957	+	13.9342	1.22e-05	0.0485	GCTCTTCCGGCG
PRDM1	hTFtarget	NC_037357.1:14356363-14358362	85	98	+	13.3939	1.22e-05	0.0475	AGGAGGGAAAGTGT
RELA	hTFtarget	NC_037357.1:14356363-14358362	1960	1973	-	12.5921	1.22e-05	0.0483	CGCGGAGCTTGCGC
SPI1	hTFtarget	NC_037357.1:14356363-14358362	1666	1683	-	13.1842	1.22e-05	0.0479	TCCCAAATTCCGCCTCCA
TCF7L2	hTFtarget	NC_037357.1:14356363-14358362	1280	1291	+	13.6866	1.22e-05	0.0469	TCCTTTGAACCT
TRIM28	hTFtarget	NC_037357.1:14356363-14358362	230	254	+	13.1923	1.22e-05	0.0235	CATTCAATGGGTGCTAAATGAATGT
ZNF384	hTFtarget	NC_037357.1:14356363-14358362	741	765	-	13.0964	1.22e-05	0.0473	CTCTTCCCTTCCCCCACTCCAACCC
DUX4	database	NC_037357.1:14356363-14358362	1752	1762	+	13.9787	1.23e-05	0.0484	TAAGCTAATCA
ETS1	hTFtarget	NC_037357.1:14356363-14358362	1947	1958	-	13.4571	1.23e-05	0.0487	ACGCCGGAAGAG
EWSR1	hTFtarget	NC_037357.1:14356363-14358362	69	93	+	-8.22727	1.23e-05	0.0234	CTGAAACAGAGAAGTCAGGAGGGAA
SMAD4	hTFtarget	NC_037357.1:14356363-14358362	1803	1815	+	13.5455	1.23e-05	0.0487	CAGGCTCGCACCC
SPI1	hTFtarget	NC_037357.1:14356363-14358362	1667	1682	+	13.0789	1.23e-05	0.0482	GGAGGCGGAATTTGGG
SPI1	hTFtarget	NC_037357.1:14356363-14358362	1924	1935	-	13.6184	1.23e-05	0.0485	CGGGGGCGTAGC
SPI1	hTFtarget	NC_037357.1:14356363-14358362	1924	1935	+	13.2632	1.23e-05	0.0488	GCTACGCCCCCG
TCF3	hTFtarget	NC_037357.1:14356363-14358362	1446	1457	+	13.75	1.23e-05	0.0488	TCCCTTGGGAGA
E2F4	hTFtarget	NC_037357.1:14356363-14358362	1984	1998	-	13.8788	1.23e-05	0.049	CCGGCGCCTCGCGCC
EGR1	database	NC_037357.1:14356363-14358362	1927	1937	-	13.4184	1.23e-05	0.0489	GCCGGGGGCGT
ENSG00000215754	database	NC_037357.1:14356363-14358362	1752	1762	+	13.949	1.23e-05	0.0484	TAAGCTAATCA
TFCP2	database	NC_037357.1:14356363-14358362	1791	1806	+	13.3673	1.23e-05	0.0484	TCCTGAACAGACCAGG
FLI1	hTFtarget	NC_037357.1:14356363-14358362	71	95	-	-41.4394	1.24e-05	0.0296	CTTTCCCTCCTGACTTCTCTGTTTC
TCF4	hTFtarget	NC_037357.1:14356363-14358362	1280	1291	-	13.8592	1.24e-05	0.0486	AGGTTCAAAGGA
ZNF384	hTFtarget	NC_037357.1:14356363-14358362	751	766	+	13.3421	1.24e-05	0.0492	GGGGGAAGGGAAGAGA
FLI1	hTFtarget	NC_037357.1:14356363-14358362	752	776	+	-11.9211	1.25e-05	0.0233	GGGGAAGGGAAGAGACACAGAATGA
GABPA	hTFtarget	NC_037357.1:14356363-14358362	1946	1957	-	13.8939	1.25e-05	0.0495	CGCCGGAAGAGC
CREB1	hTFtarget	NC_037357.1:14356363-14358362	753	777	-	12.9189	1.25e-05	0.0116	TTCATTCTGTGTCTCTTCCCTTCCC
HNF1B	database	NC_037357.1:14356363-14358362	1266	1279	+	13.1765	1.26e-05	0.0476	CATTAATATTTAAC
HOXA10	database	NC_037357.1:14356363-14358362	1226	1237	-	13.3571	1.26e-05	0.048	GTTGATTTATGA
SPI1	hTFtarget	NC_037357.1:14356363-14358362	1924	1935	+	13.5714	1.26e-05	0.0499	GCTACGCCCCCG
XBP1	hTFtarget	NC_037357.1:14356363-14358362	1947	1955	+	13.7763	1.26e-05	0.0501	CTCTTCCGG
AR	hTFtarget	NC_037357.1:14356363-14358362	798	817	+	13.1515	1.26e-05	0.0499	TGGGCAGATTCTGTTCTGCT
HNF1A	database	NC_037357.1:14356363-14358362	726	739	+	13.5253	1.27e-05	0.0471	AGTTAATGAATAGC
HNF1A	database	NC_037357.1:14356363-14358362	726	739	+	13.5253	1.27e-05	0.0471	AGTTAATGAATAGC
RBPJ	hTFtarget	NC_037357.1:14356363-14358362	1945	1956	+	13.6579	1.27e-05	0.0502	TGCTCTTCCGGC
REST	hTFtarget	NC_037357.1:14356363-14358362	1952	1976	-	12.6364	1.27e-05	0.0165	TGCCGCGGAGCTTGCGCCACGCCGG
SMAD3	hTFtarget	NC_037357.1:14356363-14358362	1804	1815	-	13.7429	1.27e-05	0.0504	GGGTGCGAGCCT
SP1	hTFtarget	NC_037357.1:14356363-14358362	1920	1935	-	12.5	1.27e-05	0.0499	CGGGGGCGTAGCGCCT
TRIM28	hTFtarget	NC_037357.1:14356363-14358362	499	514	-	13.3553	1.27e-05	0.0496	AAAGGAAGCTGAAGCA
HNF1B	database	NC_037357.1:14356363-14358362	1266	1279	-	13.1471	1.27e-05	0.0478	GTTAAATATTAATG
LMNB1	hTFtarget	NC_037357.1:14356363-14358362	496	511	+	10.378	1.28e-05	0.0489	TTTTGCTTCAGCTTCC
SPI1	hTFtarget	NC_037357.1:14356363-14358362	1667	1682	+	12.7714	1.29e-05	0.0267	GGAGGCGGAATTTGGG
SRF	hTFtarget	NC_037357.1:14356363-14358362	1952	1973	-	12.0789	1.29e-05	0.0102	CGCGGAGCTTGCGCCACGCCGG
AR	database	NC_037357.1:14356363-14358362	834	848	+	13.5408	1.3e-05	0.0299	GGTACATGGTGAACC
SP1:SP3	database	NC_037357.1:14356363-14358362	1927	1937	+	13.9694	1.3e-05	0.0515	ACGCCCCCGGC
SPI1	hTFtarget	NC_037357.1:14356363-14358362	1667	1682	-	13.4571	1.3e-05	0.0513	CCCAAATTCCGCCTCC
TAL1	hTFtarget	NC_037357.1:14356363-14358362	656	671	-	13.3788	1.3e-05	0.0508	TTATCTGCTCCTAGAA
CREBBP	hTFtarget	NC_037357.1:14356363-14358362	953	961	-	14.1579	1.3e-05	0.0508	AAATTCCAG
POU3F1	database	NC_037357.1:14356363-14358362	1364	1377	-	13.0891	1.31e-05	0.0501	AATTCATATGCATT
BRCA1	hTFtarget	NC_037357.1:14356363-14358362	1959	1973	-	13.1316	1.31e-05	0.0522	CGCGGAGCTTGCGCC
RBPJ	hTFtarget	NC_037357.1:14356363-14358362	1947	1955	+	14.3684	1.31e-05	0.0519	CTCTTCCGG
CREB1	hTFtarget	NC_037357.1:14356363-14358362	799	814	-	13.3	1.31e-05	0.052	AGAACAGAATCTGCCC
POU3F1	database	NC_037357.1:14356363-14358362	1364	1377	+	13.099	1.31e-05	0.0498	AATGCATATGAATT
FOXQ1	database	NC_037357.1:14356363-14358362	690	701	+	13.6122	1.32e-05	0.0519	CACTGTTTAGTT
FLI1	hTFtarget	NC_037357.1:14356363-14358362	74	95	-	-3.8	1.32e-05	0.026	CTTTCCCTCCTGACTTCTCTGT
KDM5B	hTFtarget	NC_037357.1:14356363-14358362	489	513	-	11.7436	1.32e-05	0.00986	AAGGAAGCTGAAGCAAAAGAGGGGA
NR3C1	hTFtarget	NC_037357.1:14356363-14358362	800	815	+	13.3714	1.32e-05	0.0516	GGCAGATTCTGTTCTG
SP1	hTFtarget	NC_037357.1:14356363-14358362	1924	1935	-	13.3816	1.32e-05	0.052	CGGGGGCGTAGC
TCF7L2	database	NC_037357.1:14356363-14358362	1279	1292	-	13.7636	1.33e-05	0.0501	GAGGTTCAAAGGAG
EZH2	hTFtarget	NC_037357.1:14356363-14358362	748	763	-	12.8831	1.33e-05	0.0254	CTTCCCTTCCCCCACT
EZH2	hTFtarget	NC_037357.1:14356363-14358362	756	771	-	12.8831	1.33e-05	0.0254	CTGTGTCTCTTCCCTT
TCF7L2	hTFtarget	NC_037357.1:14356363-14358362	1280	1291	-	13.4848	1.33e-05	0.0522	AGGTTCAAAGGA
FOXQ1	database	NC_037357.1:14356363-14358362	690	701	-	13.602	1.33e-05	0.0519	AACTAAACAGTG
TGIF2LX	database	NC_037357.1:14356363-14358362	1764	1775	-	10.5714	1.33e-05	0.0526	CGACACCTGGCA
HNF1B	hTFtarget	NC_037357.1:14356363-14358362	1265	1280	-	13.1212	1.34e-05	0.0258	AGTTAAATATTAATGG
IKZF1	hTFtarget	NC_037357.1:14356363-14358362	749	764	-	12.8333	1.34e-05	0.0525	TCTTCCCTTCCCCCAC
VEZF1	hTFtarget	NC_037357.1:14356363-14358362	746	767	-	12.3571	1.34e-05	0.0517	GTCTCTTCCCTTCCCCCACTCC
ID2	database	NC_037357.1:14356363-14358362	1765	1774	+	13.6939	1.34e-05	0.0533	GCCAGGTGTC
FLI1	hTFtarget	NC_037357.1:14356363-14358362	84	95	+	12.4079	1.35e-05	0.0232	CAGGAGGGAAAG
MYH11	hTFtarget	NC_037357.1:14356363-14358362	1946	1957	+	13.6711	1.35e-05	0.0534	GCTCTTCCGGCG
REST	hTFtarget	NC_037357.1:14356363-14358362	311	322	-	12.8026	1.35e-05	0.0533	TGGAGATGTCCC
AR	hTFtarget	NC_037357.1:14356363-14358362	800	813	-	13.1571	1.35e-05	0.0534	GAACAGAATCTGCC
ELK1	hTFtarget	NC_037357.1:14356363-14358362	1946	1957	-	13.6667	1.35e-05	0.0535	CGCCGGAAGAGC
E2F6	database	NC_037357.1:14356363-14358362	85	95	+	14.069	1.36e-05	0.0536	AGGAGGGAAAG
SPI1	hTFtarget	NC_037357.1:14356363-14358362	1919	1934	-	12.6714	1.36e-05	0.0267	GGGGGCGTAGCGCCTG
ELF1	hTFtarget	NC_037357.1:14356363-14358362	1946	1958	-	13.6667	1.36e-05	0.0541	ACGCCGGAAGAGC
AR	hTFtarget	NC_037357.1:14356363-14358362	800	815	+	13.2727	1.37e-05	0.0541	GGCAGATTCTGTTCTG
GTF2I	hTFtarget	NC_037357.1:14356363-14358362	909	930	-	11.3158	1.37e-05	0.0538	CCCTAGCTCAGGACCCCTGAAA
AR	hTFtarget	NC_037357.1:14356363-14358362	833	848	-	13.197	1.38e-05	0.0509	GGTTCACCATGTACCC
SPI1	hTFtarget	NC_037357.1:14356363-14358362	1921	1936	+	13.0526	1.38e-05	0.0541	GGCGCTACGCCCCCGG
SPI1	hTFtarget	NC_037357.1:14356363-14358362	1919	1934	-	13.1857	1.38e-05	0.0268	GGGGGCGTAGCGCCTG
TCF7L2	hTFtarget	NC_037357.1:14356363-14358362	1280	1291	-	13.0149	1.38e-05	0.0543	AGGTTCAAAGGA
FOXA1	hTFtarget	NC_037357.1:14356363-14358362	95	109	-	12.3766	1.39e-05	0.0551	TACATCCACATACAC
SPI1	hTFtarget	NC_037357.1:14356363-14358362	1667	1682	-	13.3143	1.39e-05	0.0279	CCCAAATTCCGCCTCC
HES4	database	NC_037357.1:14356363-14358362	1984	1993	+	8.84694	1.39e-05	0.0555	GGCGCGAGGC
MBD3	hTFtarget	NC_037357.1:14356363-14358362	1629	1650	+	12.9615	1.4e-05	0.0547	GGGGTGCGCGTGTGAGTTACTG
SPI1	hTFtarget	NC_037357.1:14356363-14358362	1919	1934	-	13.1286	1.4e-05	0.0445	GGGGGCGTAGCGCCTG
EP300	database	NC_037357.1:14356363-14358362	482	495	-	11.88	1.4e-05	0.0551	GAGGGGAGTAAGAC
KDM1A	hTFtarget	NC_037357.1:14356363-14358362	743	764	+	12.7183	1.41e-05	0.0542	GTTGGAGTGGGGGAAGGGAAGA
TCF7L2	hTFtarget	NC_037357.1:14356363-14358362	1280	1291	+	13.1818	1.41e-05	0.0554	TCCTTTGAACCT
GTF3C2	hTFtarget	NC_037357.1:14356363-14358362	1536	1557	-	12.9744	1.42e-05	0.055	CTCTCTCAAATCCCAATGCATA
SPI1	hTFtarget	NC_037357.1:14356363-14358362	1919	1934	+	13.2857	1.42e-05	0.0279	CAGGCGCTACGCCCCC
SPI1	hTFtarget	NC_037357.1:14356363-14358362	1899	1920	+	12.4474	1.42e-05	0.0563	CCGCTGCTAGCTCTAGTGGTCA
SUZ12	hTFtarget	NC_037357.1:14356363-14358362	1631	1642	-	12.1184	1.42e-05	0.0564	CACACGCGCACC
AR	hTFtarget	NC_037357.1:14356363-14358362	800	813	-	13.1364	1.42e-05	0.0563	GAACAGAATCTGCC
ELK4	hTFtarget	NC_037357.1:14356363-14358362	1947	1957	-	13.6667	1.42e-05	0.0565	CGCCGGAAGAG
TLX1	database	NC_037357.1:14356363-14358362	815	825	-	11.7857	1.43e-05	0.0568	TGCTAAGAAGC
GTF2I	hTFtarget	NC_037357.1:14356363-14358362	1000	1015	+	12.8961	1.43e-05	0.0565	TGTGAACATGTGCAAG
NFYA	hTFtarget	NC_037357.1:14356363-14358362	1667	1678	+	13.6143	1.43e-05	0.0564	GGAGGCGGAATT
NR3C1	hTFtarget	NC_037357.1:14356363-14358362	799	814	-	13.2273	1.43e-05	0.0569	AGAACAGAATCTGCCC
SPI1	hTFtarget	NC_037357.1:14356363-14358362	1919	1934	-	13.1714	1.43e-05	0.0278	GGGGGCGTAGCGCCTG
SPI1	hTFtarget	NC_037357.1:14356363-14358362	1957	1972	+	11.7632	1.43e-05	0.0568	GTGGCGCAAGCTCCGC
TCF4	hTFtarget	NC_037357.1:14356363-14358362	1917	1938	-	11.6447	1.43e-05	0.0459	CGCCGGGGGCGTAGCGCCTGAC
AR	hTFtarget	NC_037357.1:14356363-14358362	800	815	-	13.2273	1.43e-05	0.0564	CAGAACAGAATCTGCC
HOXA9	hTFtarget	NC_037357.1:14356363-14358362	1446	1454	-	13.9605	1.44e-05	0.0571	CCCAAGGGA
SPI1	hTFtarget	NC_037357.1:14356363-14358362	1924	1939	+	13.2763	1.44e-05	0.0569	GCTACGCCCCCGGCGC
SPI1	hTFtarget	NC_037357.1:14356363-14358362	1666	1683	-	12.8026	1.44e-05	0.0567	TCCCAAATTCCGCCTCCA
ATF3	database	NC_037357.1:14356363-14358362	1594	1607	+	13.1261	1.45e-05	0.0507	TTCTGCCGTCACTC
ATF1	database	NC_037357.1:14356363-14358362	1771	1781	-	13.633	1.45e-05	0.0576	CCTGGACGACA
ELSPBP1	database	NC_037357.1:14356363-14358362	1765	1775	+	13.7798	1.45e-05	0.0573	GCCAGGTGTCG
STAT4	database	NC_037357.1:14356363-14358362	162	171	-	12.7143	1.45e-05	0.0573	TTCAAGGAAA
RELA	hTFtarget	NC_037357.1:14356363-14358362	1956	1971	-	11.6286	1.45e-05	0.0575	CGGAGCTTGCGCCACG
ELK4	hTFtarget	NC_037357.1:14356363-14358362	1946	1956	-	13.697	1.45e-05	0.0578	GCCGGAAGAGC
GZF1	database	NC_037357.1:14356363-14358362	1206	1217	-	9.95918	1.46e-05	0.058	TGAGCATCTATA
PML	hTFtarget	NC_037357.1:14356363-14358362	656	671	-	13.1286	1.46e-05	0.0579	TTATCTGCTCCTAGAA
RELA	hTFtarget	NC_037357.1:14356363-14358362	1958	1973	-	11.4342	1.46e-05	0.0578	CGCGGAGCTTGCGCCA
SMAD2/SMAD3	hTFtarget	NC_037357.1:14356363-14358362	1804	1815	-	13.4714	1.46e-05	0.0581	GGGTGCGAGCCT
ELF2	hTFtarget	NC_037357.1:14356363-14358362	1947	1958	-	13.5395	1.46e-05	0.0582	ACGCCGGAAGAG
ETS1	hTFtarget	NC_037357.1:14356363-14358362	1947	1958	-	13.3857	1.47e-05	0.0584	ACGCCGGAAGAG
AR	hTFtarget	NC_037357.1:14356363-14358362	833	848	+	13.1143	1.47e-05	0.0576	GGGTACATGGTGAACC
SPI1	hTFtarget	NC_037357.1:14356363-14358362	1667	1682	+	12.8286	1.47e-05	0.0287	GGAGGCGGAATTTGGG
ELK1	hTFtarget	NC_037357.1:14356363-14358362	1946	1956	-	13.5571	1.47e-05	0.0585	GCCGGAAGAGC
KLF1	hTFtarget	NC_037357.1:14356363-14358362	1628	1643	-	12.8553	1.48e-05	0.0344	TCACACGCGCACCCCC
NR2C2	hTFtarget	NC_037357.1:14356363-14358362	1947	1962	+	12.5263	1.48e-05	0.0587	CTCTTCCGGCGTGGCG
SPI1	hTFtarget	NC_037357.1:14356363-14358362	1960	1971	+	13.2763	1.48e-05	0.0459	GCGCAAGCTCCG
TCF12	hTFtarget	NC_037357.1:14356363-14358362	748	763	+	13.1184	1.48e-05	0.0565	AGTGGGGGAAGGGAAG
ELF1	hTFtarget	NC_037357.1:14356363-14358362	1946	1959	-	13.4091	1.48e-05	0.0589	CACGCCGGAAGAGC
HBP1	database	NC_037357.1:14356363-14358362	233	241	+	13.4683	1.49e-05	0.0589	TCAATGGGT
HOXB4	database	NC_037357.1:14356363-14358362	724	740	+	12.6532	1.49e-05	0.0586	CAAGTTAATGAATAGCT
FLI1	hTFtarget	NC_037357.1:14356363-14358362	751	772	-	-4.28571	1.49e-05	0.026	TCTGTGTCTCTTCCCTTCCCCC
BRCA1	hTFtarget	NC_037357.1:14356363-14358362	1924	1935	+	13.0658	1.49e-05	0.0587	GCTACGCCCCCG
CBX1	hTFtarget	NC_037357.1:14356363-14358362	879	887	+	13.9211	1.49e-05	0.0584	ATCATCAAA
HBP1	database	NC_037357.1:14356363-14358362	233	241	-	13.6139	1.49e-05	0.0589	ACCCATTGA
AR	database	NC_037357.1:14356363-14358362	834	848	+	13.2472	1.5e-05	0.0299	GGTACATGGTGAACC
FLI1	hTFtarget	NC_037357.1:14356363-14358362	73	92	-	-29.2576	1.5e-05	0.0568	TCCCTCCTGACTTCTCTGTT
NFYA	hTFtarget	NC_037357.1:14356363-14358362	1667	1678	-	13.6579	1.5e-05	0.0594	AATTCCGCCTCC
PRDM1	hTFtarget	NC_037357.1:14356363-14358362	753	777	-	11.5357	1.5e-05	0.0588	TTCATTCTGTGTCTCTTCCCTTCCC
REST	hTFtarget	NC_037357.1:14356363-14358362	311	322	-	12.9605	1.5e-05	0.0596	TGGAGATGTCCC
SPI1	hTFtarget	NC_037357.1:14356363-14358362	1919	1934	+	13.1143	1.5e-05	0.0313	CAGGCGCTACGCCCCC
SPI1	hTFtarget	NC_037357.1:14356363-14358362	1920	1935	+	12.9429	1.5e-05	0.0585	AGGCGCTACGCCCCCG
TBL1XR1	hTFtarget	NC_037357.1:14356363-14358362	1923	1938	+	13.0263	1.5e-05	0.0297	CGCTACGCCCCCGGCG
AR	database	NC_037357.1:14356363-14358362	834	848	-	13.3163	1.51e-05	0.0299	GGTTCACCATGTACC
EP300	hTFtarget	NC_037357.1:14356363-14358362	391	406	-	9.07895	1.51e-05	0.0549	TTCTCATCCCCTTTCC
FOXA1	hTFtarget	NC_037357.1:14356363-14358362	1627	1642	-	12.9298	1.52e-05	0.0589	CACACGCGCACCCCCA
AR	hTFtarget	NC_037357.1:14356363-14358362	387	403	+	12.7349	1.52e-05	0.0597	GAGTGGAAAGGGGATGA
SPI1	hTFtarget	NC_037357.1:14356363-14358362	1922	1933	+	13.0286	1.52e-05	0.0595	GCGCTACGCCCC
SPI1	hTFtarget	NC_037357.1:14356363-14358362	1923	1934	+	13.1053	1.52e-05	0.06	CGCTACGCCCCC
CREBBP	hTFtarget	NC_037357.1:14356363-14358362	1655	1670	-	13.1408	1.52e-05	0.0588	CTCCATCCTTCACTCC
EBF1	hTFtarget	NC_037357.1:14356363-14358362	1444	1458	-	13.2121	1.52e-05	0.03	GTCTCCCAAGGGAGG
TOPORS	database	NC_037357.1:14356363-14358362	298	314	-	-3.62245	1.52e-05	0.034	TCCCAGGCAAACTGGGA
POLR2A	hTFtarget	NC_037357.1:14356363-14358362	1662	1675	+	12.9737	1.53e-05	0.0607	AGGATGGAGGCGGA
SUMO2/SUMO3	hTFtarget	NC_037357.1:14356363-14358362	1925	1940	+	12.8816	1.53e-05	0.0607	CTACGCCCCCGGCGCG
ELF1	hTFtarget	NC_037357.1:14356363-14358362	1947	1955	+	13.7632	1.53e-05	0.0609	CTCTTCCGG
GATA3	hTFtarget	NC_037357.1:14356363-14358362	1131	1142	+	13.3684	1.54e-05	0.0603	ATGATATTATCA
SPI1	hTFtarget	NC_037357.1:14356363-14358362	1667	1682	-	13.1714	1.54e-05	0.0447	CCCAAATTCCGCCTCC
E2F1	hTFtarget	NC_037357.1:14356363-14358362	1933	1948	-	13.2273	1.54e-05	0.0203	AGCACTGGCGCGCCGG
E2F4	hTFtarget	NC_037357.1:14356363-14358362	1922	1933	+	12.9079	1.54e-05	0.0607	GCGCTACGCCCC
ELF1	hTFtarget	NC_037357.1:14356363-14358362	1946	1959	-	13.1364	1.54e-05	0.0609	CACGCCGGAAGAGC
CREM	database	NC_037357.1:14356363-14358362	1597	1607	+	13.0714	1.55e-05	0.0617	TGCCGTCACTC
BMI1	hTFtarget	NC_037357.1:14356363-14358362	1978	1999	+	13.013	1.55e-05	0.0607	GCAATGGGCGCGAGGCGCCGGG
RELA	hTFtarget	NC_037357.1:14356363-14358362	746	761	-	13.1842	1.55e-05	0.0306	TCCCTTCCCCCACTCC
SPI1	hTFtarget	NC_037357.1:14356363-14358362	1924	1935	-	13.2429	1.55e-05	0.0608	CGGGGGCGTAGC
USF1	hTFtarget	NC_037357.1:14356363-14358362	327	348	-	11	1.55e-05	0.061	ATTCCTACCAATTGGAAGTATA
ZNF143	hTFtarget	NC_037357.1:14356363-14358362	1985	2000	+	12.4605	1.55e-05	0.0614	GCGCGAGGCGCCGGGA
FLI1	hTFtarget	NC_037357.1:14356363-14358362	1655	1668	-	-4.64474	1.56e-05	0.0355	CCATCCTTCACTCC
REST	hTFtarget	NC_037357.1:14356363-14358362	311	324	-	12.1447	1.56e-05	0.0617	CGTGGAGATGTCCC
SMAD1	hTFtarget	NC_037357.1:14356363-14358362	1364	1385	+	12.7412	1.56e-05	0.0608	AATGCATATGAATTGATTAGCA
SP1	hTFtarget	NC_037357.1:14356363-14358362	1667	1678	-	13.4079	1.56e-05	0.0353	AATTCCGCCTCC
TCF4	hTFtarget	NC_037357.1:14356363-14358362	1279	1294	-	13.197	1.56e-05	0.043	CTGAGGTTCAAAGGAG
ERG	hTFtarget	NC_037357.1:14356363-14358362	491	515	+	-16.3289	1.56e-05	0.016	CCCTCTTTTGCTTCAGCTTCCTTTT
FLI1	hTFtarget	NC_037357.1:14356363-14358362	262	286	-	-42.8182	1.57e-05	0.0296	TCTCCCAGCTTCTACTCCTTTCTTC
SPI1	hTFtarget	NC_037357.1:14356363-14358362	1919	1934	-	13.0286	1.58e-05	0.0308	GGGGGCGTAGCGCCTG
STAT5B	hTFtarget	NC_037357.1:14356363-14358362	1947	1955	+	13.3816	1.58e-05	0.0628	CTCTTCCGG
IRF5	database	NC_037357.1:14356363-14358362	801	820	-	2.60204	1.58e-05	0.0606	AGAAGCAGAACAGAATCTGC
SRY	database	NC_037357.1:14356363-14358362	1424	1435	+	12.2809	1.59e-05	0.0615	TTTAACAATACG
GATA1	hTFtarget	NC_037357.1:14356363-14358362	656	673	+	13.1714	1.59e-05	0.0631	TTCTAGGAGCAGATAAAA
SP1	hTFtarget	NC_037357.1:14356363-14358362	1924	1935	-	13.2237	1.59e-05	0.063	CGGGGGCGTAGC
SPI1	hTFtarget	NC_037357.1:14356363-14358362	1667	1682	-	13.0143	1.59e-05	0.0313	CCCAAATTCCGCCTCC
YY1	hTFtarget	NC_037357.1:14356363-14358362	1947	1955	+	12.9737	1.59e-05	0.0634	CTCTTCCGG
ESR1	hTFtarget	NC_037357.1:14356363-14358362	71	92	+	2.92958	1.6e-05	0.0307	GAAACAGAGAAGTCAGGAGGGA
STAT1	hTFtarget	NC_037357.1:14356363-14358362	1459	1474	-	7.69737	1.6e-05	0.0632	CTACCCCTTTTCCACA
XBP1	hTFtarget	NC_037357.1:14356363-14358362	1638	1656	-	12.75	1.6e-05	0.0636	CCCAATCAGTAACTCACAC
EP300	hTFtarget	NC_037357.1:14356363-14358362	267	289	-	12.9211	1.6e-05	0.0618	AGCTCTCCCAGCTTCTACTCCTT
TCF7L2	database	NC_037357.1:14356363-14358362	1280	1291	+	12.9697	1.6e-05	0.0619	TCCTTTGAACCT
TCF7L2	database	NC_037357.1:14356363-14358362	1280	1291	-	13	1.61e-05	0.0627	AGGTTCAAAGGA
ELK1	database	NC_037357.1:14356363-14358362	1949	1958	-	12.3778	1.61e-05	0.0637	ACGCCGGAAG
BRCA1	hTFtarget	NC_037357.1:14356363-14358362	1946	1956	+	13.4342	1.61e-05	0.0637	GCTCTTCCGGC
SPI1	hTFtarget	NC_037357.1:14356363-14358362	1666	1681	-	13.1857	1.61e-05	0.0629	CCAAATTCCGCCTCCA
SPI1	hTFtarget	NC_037357.1:14356363-14358362	1920	1935	-	12.9	1.61e-05	0.0629	CGGGGGCGTAGCGCCT
HCFC1	hTFtarget	NC_037357.1:14356363-14358362	1943	1958	+	13.0921	1.62e-05	0.0644	AGTGCTCTTCCGGCGT
SIN3A	hTFtarget	NC_037357.1:14356363-14358362	748	763	+	13.1184	1.62e-05	0.0633	AGTGGGGGAAGGGAAG
TCF7L2	hTFtarget	NC_037357.1:14356363-14358362	1279	1290	-	13.2121	1.62e-05	0.0635	GGTTCAAAGGAG
CEBPA	hTFtarget	NC_037357.1:14356363-14358362	656	673	-	12.9848	1.62e-05	0.0642	TTTTATCTGCTCCTAGAA
CREBBP	hTFtarget	NC_037357.1:14356363-14358362	751	771	+	-6.71429	1.62e-05	0.0386	GGGGGAAGGGAAGAGACACAG
HDAC2	hTFtarget	NC_037357.1:14356363-14358362	515	523	-	13.6447	1.63e-05	0.0632	CAGAGTTCA
PCGF2	hTFtarget	NC_037357.1:14356363-14358362	1654	1675	-	12.9868	1.63e-05	0.0456	TCCGCCTCCATCCTTCACTCCC
TAL1	hTFtarget	NC_037357.1:14356363-14358362	656	671	-	13.2273	1.63e-05	0.0646	TTATCTGCTCCTAGAA
DDX5	hTFtarget	NC_037357.1:14356363-14358362	1627	1642	-	12.9351	1.63e-05	0.0639	CACACGCGCACCCCCA
AR	hTFtarget	NC_037357.1:14356363-14358362	834	849	-	13.2105	1.64e-05	0.0572	TGGTTCACCATGTACC
GATA1	hTFtarget	NC_037357.1:14356363-14358362	274	285	-	13.3421	1.64e-05	0.0649	CTCCCAGCTTCT
MED1	hTFtarget	NC_037357.1:14356363-14358362	1947	1955	+	13.4737	1.64e-05	0.0649	CTCTTCCGG
HOXD8	database	NC_037357.1:14356363-14358362	1414	1430	-	12.4571	1.65e-05	0.063	TGTTAAATTAATAGCTA
EZH2	hTFtarget	NC_037357.1:14356363-14358362	759	780	-	12.974	1.65e-05	0.0315	TCATTCATTCTGTGTCTCTTCC
HDAC1	hTFtarget	NC_037357.1:14356363-14358362	1947	1958	+	13.3816	1.65e-05	0.0653	CTCTTCCGGCGT
TCF7L2	hTFtarget	NC_037357.1:14356363-14358362	1279	1290	-	13	1.65e-05	0.0646	GGTTCAAAGGAG
TRIM28	hTFtarget	NC_037357.1:14356363-14358362	1081	1102	-	9.39759	1.65e-05	0.0651	GATTTCACTCCAGAAATAATCA
CTNNB1	hTFtarget	NC_037357.1:14356363-14358362	1280	1291	-	13.338	1.65e-05	0.0643	AGGTTCAAAGGA
POLR2A	hTFtarget	NC_037357.1:14356363-14358362	1919	1934	+	11.8158	1.66e-05	0.0657	CAGGCGCTACGCCCCC
POLR3A	hTFtarget	NC_037357.1:14356363-14358362	203	218	-	12.9286	1.66e-05	0.0658	TCTAGGTTCAGTGGGT
SPI1	hTFtarget	NC_037357.1:14356363-14358362	1924	1935	-	13.1447	1.66e-05	0.0659	CGGGGGCGTAGC
TAL1	hTFtarget	NC_037357.1:14356363-14358362	656	671	+	13.0758	1.66e-05	0.0655	TTCTAGGAGCAGATAA
TBP	hTFtarget	NC_037357.1:14356363-14358362	634	649	-	12.8026	1.66e-05	0.0658	GGTTGCCTAGTTGTAG
E2F4	hTFtarget	NC_037357.1:14356363-14358362	1923	1933	+	12.9211	1.66e-05	0.0654	CGCTACGCCCC
ELK4	database	NC_037357.1:14356363-14358362	1946	1956	+	13.6364	1.67e-05	0.0663	GCTCTTCCGGC
ESR1	hTFtarget	NC_037357.1:14356363-14358362	258	273	-	12.6753	1.67e-05	0.0612	ACTCCTTTCTTCACCA
AR	hTFtarget	NC_037357.1:14356363-14358362	762	777	+	13.0256	1.67e-05	0.0572	AGAGACACAGAATGAA
TAF1	hTFtarget	NC_037357.1:14356363-14358362	488	508	+	12.1711	1.67e-05	0.0657	CTCCCCTCTTTTGCTTCAGCT
VDR	database	NC_037357.1:14356363-14358362	752	766	+	13.1	1.68e-05	0.0658	GGGGAAGGGAAGAGA
MYC	hTFtarget	NC_037357.1:14356363-14358362	95	103	-	13.9737	1.68e-05	0.0669	CACATACAC
NRF1	hTFtarget	NC_037357.1:14356363-14358362	1959	1972	-	12.5	1.68e-05	0.0539	GCGGAGCTTGCGCC
RELA	hTFtarget	NC_037357.1:14356363-14358362	1960	1973	-	12.4605	1.68e-05	0.0668	CGCGGAGCTTGCGC
SPI1	hTFtarget	NC_037357.1:14356363-14358362	288	303	-	13.1053	1.68e-05	0.0527	CTGGGAAGGTTTTCAG
SPI1	hTFtarget	NC_037357.1:14356363-14358362	1662	1683	+	12.3286	1.68e-05	0.0331	AGGATGGAGGCGGAATTTGGGA
GABPA	hTFtarget	NC_037357.1:14356363-14358362	1947	1958	-	13.3636	1.69e-05	0.0672	ACGCCGGAAGAG
GATA1	hTFtarget	NC_037357.1:14356363-14358362	745	760	+	12.1811	1.69e-05	0.0569	TGGAGTGGGGGAAGGG
SPI1	hTFtarget	NC_037357.1:14356363-14358362	1919	1934	-	13.1429	1.69e-05	0.0661	GGGGGCGTAGCGCCTG
C17orf96	hTFtarget	NC_037357.1:14356363-14358362	260	284	+	12.8354	1.69e-05	0.0295	GTGAAGAAAGGAGTAGAAGCTGGGA
TCF4	hTFtarget	NC_037357.1:14356363-14358362	506	521	-	13	1.69e-05	0.0662	GAGTTCAAAAGGAAGC
SPI1	hTFtarget	NC_037357.1:14356363-14358362	1666	1681	+	12.9	1.7e-05	0.0667	TGGAGGCGGAATTTGG
ZFP42	hTFtarget	NC_037357.1:14356363-14358362	1947	1955	+	13.6447	1.7e-05	0.0673	CTCTTCCGG
ELK3	hTFtarget	NC_037357.1:14356363-14358362	1667	1682	+	12.6053	1.7e-05	0.038	GGAGGCGGAATTTGGG
IRF5	database	NC_037357.1:14356363-14358362	801	820	-	6.46341	1.71e-05	0.0658	AGAAGCAGAACAGAATCTGC
GATA3	hTFtarget	NC_037357.1:14356363-14358362	1132	1143	+	13.3289	1.71e-05	0.0677	TGATATTATCAG
EWSR1	hTFtarget	NC_037357.1:14356363-14358362	750	765	+	9.05714	1.71e-05	0.0147	TGGGGGAAGGGAAGAG
BRCA1	hTFtarget	NC_037357.1:14356363-14358362	1627	1644	-	12.6753	1.71e-05	0.0677	CTCACACGCGCACCCCCA
SPI1	hTFtarget	NC_037357.1:14356363-14358362	1919	1934	+	12.7143	1.71e-05	0.0335	CAGGCGCTACGCCCCC
AR	hTFtarget	NC_037357.1:14356363-14358362	800	815	+	13.2121	1.71e-05	0.0395	GGCAGATTCTGTTCTG
EP300	hTFtarget	NC_037357.1:14356363-14358362	1239	1252	-	13.1316	1.71e-05	0.0676	TCTGTCTACCGTCT
ETS1	hTFtarget	NC_037357.1:14356363-14358362	295	310	+	12.987	1.72e-05	0.0338	CCTTCCCAGTTTGCCT
FLI1	hTFtarget	NC_037357.1:14356363-14358362	752	763	+	11.8684	1.72e-05	0.0232	GGGGAAGGGAAG
SPI1	hTFtarget	NC_037357.1:14356363-14358362	1667	1682	-	12.3714	1.72e-05	0.0341	CCCAAATTCCGCCTCC
SPI1	hTFtarget	NC_037357.1:14356363-14358362	1923	1934	-	13.1842	1.72e-05	0.0675	GGGGGCGTAGCG
SPI1	hTFtarget	NC_037357.1:14356363-14358362	1659	1682	+	12.3158	1.72e-05	0.0337	TGAAGGATGGAGGCGGAATTTGGG
SPI1	hTFtarget	NC_037357.1:14356363-14358362	1667	1682	-	12.3	1.72e-05	0.0336	CCCAAATTCCGCCTCC
PHF8	hTFtarget	NC_037357.1:14356363-14358362	1926	1941	-	12.8701	1.73e-05	0.0684	GCGCGCCGGGGGCGTA
RUNX1	hTFtarget	NC_037357.1:14356363-14358362	752	766	-	13.1447	1.73e-05	0.0669	TCTCTTCCCTTCCCC
SPI1	hTFtarget	NC_037357.1:14356363-14358362	1922	1937	-	12.8857	1.73e-05	0.0675	GCCGGGGGCGTAGCGC
TCF4	hTFtarget	NC_037357.1:14356363-14358362	1280	1291	-	13.2958	1.73e-05	0.0674	AGGTTCAAAGGA
ERG	hTFtarget	NC_037357.1:14356363-14358362	755	779	-	-16.8684	1.73e-05	0.016	CATTCATTCTGTGTCTCTTCCCTTC
TOPORS	database	NC_037357.1:14356363-14358362	298	314	+	-4.21429	1.73e-05	0.034	TCCCAGTTTGCCTGGGA
KLF1	hTFtarget	NC_037357.1:14356363-14358362	1626	1641	-	12.5658	1.74e-05	0.0344	ACACGCGCACCCCCAA
ERG	hTFtarget	NC_037357.1:14356363-14358362	799	814	+	13.0658	1.75e-05	0.069	GGGCAGATTCTGTTCT
NRF1	hTFtarget	NC_037357.1:14356363-14358362	1959	1970	-	11.6364	1.75e-05	0.0647	GGAGCTTGCGCC
SPI1	hTFtarget	NC_037357.1:14356363-14358362	1667	1682	+	12.6842	1.75e-05	0.069	GGAGGCGGAATTTGGG
EP300	hTFtarget	NC_037357.1:14356363-14358362	656	671	-	12.8485	1.75e-05	0.0695	TTATCTGCTCCTAGAA
KLF9	database	NC_037357.1:14356363-14358362	1923	1936	-	12.1735	1.75e-05	0.0694	CCGGGGGCGTAGCG
P50:RELA-P65	database	NC_037357.1:14356363-14358362	173	184	-	13.2143	1.76e-05	0.0696	GGCAGTCCCCAC
OGT	hTFtarget	NC_037357.1:14356363-14358362	1959	1974	+	10.3939	1.76e-05	0.0697	GGCGCAAGCTCCGCGG
ZBTB17	hTFtarget	NC_037357.1:14356363-14358362	1087	1108	-	-0.815789	1.76e-05	0.0695	TTTATAGATTTCACTCCAGAAA
ELK1	hTFtarget	NC_037357.1:14356363-14358362	1948	1956	-	13.2763	1.76e-05	0.0696	GCCGGAAGA
POU4F2	database	NC_037357.1:14356363-14358362	1261	1273	+	13.3663	1.76e-05	0.0686	CAAACCATTAATA
AR	database	NC_037357.1:14356363-14358362	834	849	+	12.8158	1.77e-05	0.0539	GGTACATGGTGAACCA
POU4F2	database	NC_037357.1:14356363-14358362	1261	1273	-	13.3587	1.77e-05	0.069	TATTAATGGTTTG
ESR1	hTFtarget	NC_037357.1:14356363-14358362	1844	1859	+	12.8056	1.77e-05	0.0695	ATGGACCAGAGAAAAA
SPI1	hTFtarget	NC_037357.1:14356363-14358362	753	764	-	13.0921	1.77e-05	0.0701	TCTTCCCTTCCC
AR	hTFtarget	NC_037357.1:14356363-14358362	800	815	-	12.9091	1.77e-05	0.0683	CAGAACAGAATCTGCC
STAT5A	hTFtarget	NC_037357.1:14356363-14358362	1631	1642	-	12.3553	1.77e-05	0.0351	CACACGCGCACC
MZF1	hTFtarget	NC_037357.1:14356363-14358362	1960	1973	+	12.3289	1.78e-05	0.0707	GCGCAAGCTCCGCG
BRD4	hTFtarget	NC_037357.1:14356363-14358362	1947	1958	+	13.4474	1.78e-05	0.0706	CTCTTCCGGCGT
SP1	hTFtarget	NC_037357.1:14356363-14358362	1923	1934	+	13.1842	1.78e-05	0.0353	CGCTACGCCCCC
SPI1	hTFtarget	NC_037357.1:14356363-14358362	1667	1682	-	12.1053	1.78e-05	0.0704	CCCAAATTCCGCCTCC
EP300	hTFtarget	NC_037357.1:14356363-14358362	755	768	+	9.28571	1.78e-05	0.0662	GAAGGGAAGAGACA
AR	database	NC_037357.1:14356363-14358362	834	849	-	12.7778	1.78e-05	0.0542	TGGTTCACCATGTACC
TCF4	database	NC_037357.1:14356363-14358362	1281	1288	+	13.1066	1.79e-05	0.071	CCTTTGAA
NR3C1	database	NC_037357.1:14356363-14358362	807	814	+	10.9	1.79e-05	0.0692	TCTGTTCT
PXR:RXR	database	NC_037357.1:14356363-14358362	515	522	-	11.0303	1.79e-05	0.0706	AGAGTTCA
FOXA1	hTFtarget	NC_037357.1:14356363-14358362	1736	1743	+	12.3194	1.79e-05	0.0702	AGCAAACA
FOXA1	hTFtarget	NC_037357.1:14356363-14358362	1736	1743	+	12.8442	1.79e-05	0.0701	AGCAAACA
IRF3	hTFtarget	NC_037357.1:14356363-14358362	746	770	+	11.0128	1.79e-05	0.0192	GGAGTGGGGGAAGGGAAGAGACACA
MYB	hTFtarget	NC_037357.1:14356363-14358362	1525	1533	-	12.1571	1.79e-05	0.0707	CAACTGACA
RNF2	hTFtarget	NC_037357.1:14356363-14358362	869	884	-	13.1286	1.79e-05	0.0707	GATGATGACGGTGATG
FOXP4	database	NC_037357.1:14356363-14358362	1554	1568	+	13.3069	1.79e-05	0.069	AGAGAAAAAAAATTC
STAT1	hTFtarget	NC_037357.1:14356363-14358362	754	769	-	12.9296	1.8e-05	0.0683	GTGTCTCTTCCCTTCC
FLI1	hTFtarget	NC_037357.1:14356363-14358362	1440	1451	-	11.7237	1.81e-05	0.0232	AAGGGAGGTAGA
GABPA	hTFtarget	NC_037357.1:14356363-14358362	1946	1957	-	13.2424	1.81e-05	0.0718	CGCCGGAAGAGC
HDAC2	hTFtarget	NC_037357.1:14356363-14358362	1301	1312	-	12.8171	1.81e-05	0.0712	TCCATTTTATAG
BRD4	hTFtarget	NC_037357.1:14356363-14358362	751	762	-	13.0789	1.81e-05	0.0711	TTCCCTTCCCCC
RUNX1	hTFtarget	NC_037357.1:14356363-14358362	1446	1457	-	13.3289	1.81e-05	0.0716	TCTCCCAAGGGA
SPI1	hTFtarget	NC_037357.1:14356363-14358362	1936	1947	+	12.7105	1.81e-05	0.0717	GCGCGCCAGTGC
STAT1	hTFtarget	NC_037357.1:14356363-14358362	750	761	+	12.1857	1.81e-05	0.0696	TGGGGGAAGGGA
AR	hTFtarget	NC_037357.1:14356363-14358362	834	849	-	12.9605	1.82e-05	0.0707	TGGTTCACCATGTACC
FOXA1	hTFtarget	NC_037357.1:14356363-14358362	800	814	+	12.9545	1.82e-05	0.0717	GGCAGATTCTGTTCT
KDM1A	hTFtarget	NC_037357.1:14356363-14358362	1000	1015	+	12.4583	1.82e-05	0.0711	TGTGAACATGTGCAAG
RELA	hTFtarget	NC_037357.1:14356363-14358362	1959	1970	-	12.1429	1.82e-05	0.0724	GGAGCTTGCGCC
SPI1	hTFtarget	NC_037357.1:14356363-14358362	1922	1937	+	12.4342	1.82e-05	0.0712	GCGCTACGCCCCCGGC
TOP1	hTFtarget	NC_037357.1:14356363-14358362	69	80	+	12.9474	1.82e-05	0.0468	CTGAAACAGAGA
ZFX	database	NC_037357.1:14356363-14358362	1981	1999	+	12.7879	1.83e-05	0.0725	ATGGGCGCGAGGCGCCGGG
RELA	hTFtarget	NC_037357.1:14356363-14358362	1959	1970	+	10.6667	1.83e-05	0.0726	GGCGCAAGCTCC
SOX17	hTFtarget	NC_037357.1:14356363-14358362	753	770	-	12.9351	1.83e-05	0.0363	TGTGTCTCTTCCCTTCCC
EWSR1	hTFtarget	NC_037357.1:14356363-14358362	757	781	+	-9.81818	1.84e-05	0.0234	AGGGAAGAGACACAGAATGAATGAA
KDM5B	hTFtarget	NC_037357.1:14356363-14358362	1983	1998	-	10.9714	1.84e-05	0.0728	CCGGCGCCTCGCGCCC
NFYB	hTFtarget	NC_037357.1:14356363-14358362	1922	1936	+	12.4737	1.84e-05	0.0725	GCGCTACGCCCCCGG
IRF4	database	NC_037357.1:14356363-14358362	1289	1304	-	13	1.85e-05	0.0715	ATAGAAGAAACTGAGG
OTP	database	NC_037357.1:14356363-14358362	724	740	-	12.7341	1.85e-05	0.0732	AGCTATTCATTAACTTG
MECP2	hTFtarget	NC_037357.1:14356363-14358362	1774	1785	-	12.6316	1.85e-05	0.0735	AGCTCCTGGACG
EGR1	hTFtarget	NC_037357.1:14356363-14358362	1924	1945	+	12.1286	1.85e-05	0.0393	GCTACGCCCCCGGCGCGCCAGT
EP300	hTFtarget	NC_037357.1:14356363-14358362	1929	1937	+	13.0132	1.85e-05	0.0735	GCCCCCGGC
EP300	hTFtarget	NC_037357.1:14356363-14358362	1631	1642	-	12.9868	1.85e-05	0.0737	CACACGCGCACC
ZFX	database	NC_037357.1:14356363-14358362	1981	1999	+	12.7857	1.85e-05	0.0731	ATGGGCGCGAGGCGCCGGG
GABPA	hTFtarget	NC_037357.1:14356363-14358362	1948	1956	-	12.4143	1.86e-05	0.074	GCCGGAAGA
EWSR1	hTFtarget	NC_037357.1:14356363-14358362	1655	1670	+	8.84286	1.86e-05	0.0147	GGAGTGAAGGATGGAG
IRF3	hTFtarget	NC_037357.1:14356363-14358362	1667	1678	+	12.9079	1.86e-05	0.0736	GGAGGCGGAATT
MXI1	hTFtarget	NC_037357.1:14356363-14358362	1947	1955	+	13.5132	1.86e-05	0.0741	CTCTTCCGG
NR2C2	hTFtarget	NC_037357.1:14356363-14358362	1947	1955	+	13.2632	1.86e-05	0.0741	CTCTTCCGG
SPI1	hTFtarget	NC_037357.1:14356363-14358362	1960	1971	+	12.5526	1.86e-05	0.0415	GCGCAAGCTCCG
TCF4	hTFtarget	NC_037357.1:14356363-14358362	1280	1291	+	12.9091	1.86e-05	0.0725	TCCTTTGAACCT
IRF4	database	NC_037357.1:14356363-14358362	1289	1304	-	12.9703	1.86e-05	0.071	ATAGAAGAAACTGAGG
AP2	database	NC_037357.1:14356363-14358362	1928	1940	-	12.8687	1.87e-05	0.0418	CGCGCCGGGGGCG
GABPA	hTFtarget	NC_037357.1:14356363-14358362	1947	1958	-	13.1818	1.87e-05	0.0739	ACGCCGGAAGAG
HIF1A	hTFtarget	NC_037357.1:14356363-14358362	265	276	+	12.961	1.87e-05	0.0362	GAAAGGAGTAGA
KLF5	hTFtarget	NC_037357.1:14356363-14358362	1922	1933	+	13.2273	1.87e-05	0.0744	GCGCTACGCCCC
PRKDC	hTFtarget	NC_037357.1:14356363-14358362	1666	1681	-	12.7105	1.87e-05	0.0735	CCAAATTCCGCCTCCA
ELL2	hTFtarget	NC_037357.1:14356363-14358362	1970	1990	+	12	1.87e-05	0.074	CGCGGCAAGCAATGGGCGCGA
KLF5	hTFtarget	NC_037357.1:14356363-14358362	1924	1935	-	12.8421	1.88e-05	0.074	CGGGGGCGTAGC
MXI1	hTFtarget	NC_037357.1:14356363-14358362	1946	1957	-	13.1316	1.88e-05	0.0742	CGCCGGAAGAGC
NFATC1	hTFtarget	NC_037357.1:14356363-14358362	95	103	-	13.5658	1.88e-05	0.0675	CACATACAC
NR3C1	hTFtarget	NC_037357.1:14356363-14358362	801	814	-	12.8182	1.88e-05	0.0736	AGAACAGAATCTGC
TCF7L2	hTFtarget	NC_037357.1:14356363-14358362	1279	1290	-	12.9242	1.88e-05	0.0742	GGTTCAAAGGAG
GATA2	hTFtarget	NC_037357.1:14356363-14358362	655	674	+	12.8182	1.89e-05	0.0743	TTTCTAGGAGCAGATAAAAC
GATA2	hTFtarget	NC_037357.1:14356363-14358362	655	674	+	12.8182	1.89e-05	0.0749	TTTCTAGGAGCAGATAAAAC
KDM5B	hTFtarget	NC_037357.1:14356363-14358362	492	516	-	10.8974	1.89e-05	0.0118	CAAAAGGAAGCTGAAGCAAAAGAGG
SMAD1	hTFtarget	NC_037357.1:14356363-14358362	1986	1997	-	11.8421	1.89e-05	0.0375	CGGCGCCTCGCG
TAF1	hTFtarget	NC_037357.1:14356363-14358362	264	287	+	12.5658	1.89e-05	0.0364	AGAAAGGAGTAGAAGCTGGGAGAG
AR	hTFtarget	NC_037357.1:14356363-14358362	833	848	+	12.7727	1.9e-05	0.0741	GGGTACATGGTGAACC
EP300	hTFtarget	NC_037357.1:14356363-14358362	1447	1455	+	13.2857	1.9e-05	0.0756	CCCTTGGGA
PPARG	hTFtarget	NC_037357.1:14356363-14358362	1453	1471	+	12.6761	1.91e-05	0.0733	GGAGACTGTGGAAAAGGGG
TP53	hTFtarget	NC_037357.1:14356363-14358362	751	772	+	-1.88889	1.91e-05	0.0712	GGGGGAAGGGAAGAGACACAGA
ZNF143	hTFtarget	NC_037357.1:14356363-14358362	1283	1303	-	12.5641	1.91e-05	0.0739	TAGAAGAAACTGAGGTTCAAA
AR	hTFtarget	NC_037357.1:14356363-14358362	833	848	+	12.8788	1.91e-05	0.069	GGGTACATGGTGAACC
AR	hTFtarget	NC_037357.1:14356363-14358362	800	815	-	12.7424	1.91e-05	0.0584	CAGAACAGAATCTGCC
TRIM28	hTFtarget	NC_037357.1:14356363-14358362	1089	1110	+	6.56579	1.92e-05	0.0758	TCTGGAGTGAAATCTATAAAGC
ZNF143	hTFtarget	NC_037357.1:14356363-14358362	1985	2000	+	11.6974	1.92e-05	0.076	GCGCGAGGCGCCGGGA
CREB1	hTFtarget	NC_037357.1:14356363-14358362	1947	1955	+	13.5132	1.92e-05	0.076	CTCTTCCGG
FOXO3	hTFtarget	NC_037357.1:14356363-14358362	96	120	-	-1.65789	1.93e-05	0.0378	GAACACCACACTACATCCACATACA
GATA1	hTFtarget	NC_037357.1:14356363-14358362	656	672	-	12.8485	1.93e-05	0.0763	TTTATCTGCTCCTAGAA
SPI1	hTFtarget	NC_037357.1:14356363-14358362	1936	1947	+	12.6447	1.93e-05	0.0769	GCGCGCCAGTGC
SPI1	hTFtarget	NC_037357.1:14356363-14358362	1920	1935	-	12.2857	1.93e-05	0.0759	CGGGGGCGTAGCGCCT
FOXA1	hTFtarget	NC_037357.1:14356363-14358362	803	814	-	12.0143	1.94e-05	0.0759	AGAACAGAATCT
GATA1	database	NC_037357.1:14356363-14358362	664	673	+	12.9817	1.95e-05	0.0768	GCAGATAAAA
NFYA	hTFtarget	NC_037357.1:14356363-14358362	1924	1935	-	12.8	1.95e-05	0.0771	CGGGGGCGTAGC
ERG	hTFtarget	NC_037357.1:14356363-14358362	752	767	-	11.8158	1.95e-05	0.0373	GTCTCTTCCCTTCCCC
GABPA	hTFtarget	NC_037357.1:14356363-14358362	1947	1958	-	13.2286	1.96e-05	0.0777	ACGCCGGAAGAG
EWSR1	hTFtarget	NC_037357.1:14356363-14358362	751	766	+	8.71429	1.96e-05	0.0147	GGGGGAAGGGAAGAGA
BCL11A	hTFtarget	NC_037357.1:14356363-14358362	953	961	-	13.2237	1.96e-05	0.0767	AAATTCCAG
TCF12	hTFtarget	NC_037357.1:14356363-14358362	1734	1745	-	13.1818	1.96e-05	0.0759	AATGTTTGCTGA
ELK3	hTFtarget	NC_037357.1:14356363-14358362	1919	1934	-	12.3289	1.96e-05	0.038	GGGGGCGTAGCGCCTG
MXI1	hTFtarget	NC_037357.1:14356363-14358362	1947	1955	+	13.3421	1.97e-05	0.0784	CTCTTCCGG
GTF2I	hTFtarget	NC_037357.1:14356363-14358362	1666	1674	-	13.5429	1.98e-05	0.0787	CCGCCTCCA
ARRB1	hTFtarget	NC_037357.1:14356363-14358362	1960	1971	+	11.9342	1.98e-05	0.0788	GCGCAAGCTCCG
MYC	hTFtarget	NC_037357.1:14356363-14358362	507	515	-	12.6316	1.98e-05	0.0767	AAAAGGAAG
TAL1	hTFtarget	NC_037357.1:14356363-14358362	652	672	+	12.8333	1.98e-05	0.0783	AGGTTTCTAGGAGCAGATAAA
PPARG	hTFtarget	NC_037357.1:14356363-14358362	1457	1472	-	12.5821	1.99e-05	0.0757	ACCCCTTTTCCACAGT
CTBP2	hTFtarget	NC_037357.1:14356363-14358362	1655	1670	+	12.6	1.99e-05	0.0258	GGAGTGAAGGATGGAG
EGR1	hTFtarget	NC_037357.1:14356363-14358362	1627	1648	-	11.9857	1.99e-05	0.0393	GTAACTCACACGCGCACCCCCA
FOXA2	hTFtarget	NC_037357.1:14356363-14358362	1733	1743	+	12.9091	2e-05	0.0778	TTCAGCAAACA
GTF2I	hTFtarget	NC_037357.1:14356363-14358362	391	406	-	12.4605	2e-05	0.0782	TTCTCATCCCCTTTCC
HNF1A	database	NC_037357.1:14356363-14358362	725	742	+	12.4239	2.01e-05	0.0784	AAGTTAATGAATAGCTGG
MAZ	hTFtarget	NC_037357.1:14356363-14358362	1924	1945	-	11.2571	2.01e-05	0.0549	ACTGGCGCGCCGGGGGCGTAGC
TP53	hTFtarget	NC_037357.1:14356363-14358362	442	463	-	12.0897	2.01e-05	0.0785	CTGGGATGGCAAACTCTGGTCC
USF1	hTFtarget	NC_037357.1:14356363-14358362	327	348	-	12.2895	2.01e-05	0.0795	ATTCCTACCAATTGGAAGTATA
AR	hTFtarget	NC_037357.1:14356363-14358362	833	848	-	12.9848	2.01e-05	0.0395	GGTTCACCATGTACCC
AIRE	database	NC_037357.1:14356363-14358362	30	55	+	13.0674	2.02e-05	0.0798	TTTGAACATGGACAACAAGGAAAATG
IRF1	hTFtarget	NC_037357.1:14356363-14358362	391	406	-	12.7714	2.02e-05	0.0479	TTCTCATCCCCTTTCC
IRF3	hTFtarget	NC_037357.1:14356363-14358362	1550	1565	+	12.7922	2.02e-05	0.0451	TGAGAGAGAAAAAAAA
PBX1	hTFtarget	NC_037357.1:14356363-14358362	1596	1611	-	12.8947	2.03e-05	0.0805	TCAAGAGTGACGGCAG
BCL6	database	NC_037357.1:14356363-14358362	212	221	-	13.0459	2.04e-05	0.0407	ATTTCTAGGT
AR	hTFtarget	NC_037357.1:14356363-14358362	800	814	-	12.7237	2.04e-05	0.077	AGAACAGAATCTGCC
HIF1A	hTFtarget	NC_037357.1:14356363-14358362	763	780	-	5.30263	2.04e-05	0.0787	TCATTCATTCTGTGTCTC
SPI1	hTFtarget	NC_037357.1:14356363-14358362	1924	1939	+	12.6974	2.04e-05	0.0591	GCTACGCCCCCGGCGC
STAT1	hTFtarget	NC_037357.1:14356363-14358362	753	768	-	12.7465	2.04e-05	0.0472	TGTCTCTTCCCTTCCC
ZNF250	hTFtarget	NC_037357.1:14356363-14358362	1624	1645	+	12.1579	2.04e-05	0.0798	TGTTGGGGGTGCGCGTGTGAGT
AR	hTFtarget	NC_037357.1:14356363-14358362	833	848	-	12.8684	2.04e-05	0.0796	GGTTCACCATGTACCC
GRHL3	hTFtarget	NC_037357.1:14356363-14358362	1631	1646	+	12.5789	2.05e-05	0.0813	GGTGCGCGTGTGAGTT
IRF3	hTFtarget	NC_037357.1:14356363-14358362	269	293	+	10.6923	2.05e-05	0.0192	GGAGTAGAAGCTGGGAGAGCTGAAA
SPI1	hTFtarget	NC_037357.1:14356363-14358362	1924	1935	-	12.8158	2.05e-05	0.0806	CGGGGGCGTAGC
TRIM28	hTFtarget	NC_037357.1:14356363-14358362	933	951	+	6.53947	2.05e-05	0.0814	ACACAGAGAACTACACAGC
AR	hTFtarget	NC_037357.1:14356363-14358362	799	814	+	12.7368	2.05e-05	0.0809	GGGCAGATTCTGTTCT
ONECUT2	database	NC_037357.1:14356363-14358362	1008	1028	+	9.85149	2.05e-05	0.0769	TGTGCAAGATGGATTAAATCC
AR	hTFtarget	NC_037357.1:14356363-14358362	833	848	-	12.6818	2.06e-05	0.0792	GGTTCACCATGTACCC
SP1	hTFtarget	NC_037357.1:14356363-14358362	1924	1935	+	12.6974	2.06e-05	0.0807	GCTACGCCCCCG
SPI1	hTFtarget	NC_037357.1:14356363-14358362	749	760	+	13.0263	2.06e-05	0.0796	GTGGGGGAAGGG
SPI1	hTFtarget	NC_037357.1:14356363-14358362	1662	1677	-	12.6286	2.06e-05	0.0403	ATTCCGCCTCCATCCT
SPI1	hTFtarget	NC_037357.1:14356363-14358362	1667	1682	+	12.3714	2.06e-05	0.0515	GGAGGCGGAATTTGGG
YY1	hTFtarget	NC_037357.1:14356363-14358362	1680	1695	+	11.7895	2.06e-05	0.0741	GGGAGCGAAGGCTACG
REST	database	NC_037357.1:14356363-14358362	274	295	-	10.1515	2.07e-05	0.0814	GTTTTCAGCTCTCCCAGCTTCT
AR	hTFtarget	NC_037357.1:14356363-14358362	798	816	+	12.7576	2.07e-05	0.0809	TGGGCAGATTCTGTTCTGC
SP1	hTFtarget	NC_037357.1:14356363-14358362	1664	1685	+	11.2273	2.07e-05	0.0406	GATGGAGGCGGAATTTGGGAGC
SPI1	hTFtarget	NC_037357.1:14356363-14358362	1923	1934	+	12.5921	2.07e-05	0.0822	CGCTACGCCCCC
SPI1	hTFtarget	NC_037357.1:14356363-14358362	1922	1937	+	12.4143	2.07e-05	0.0815	GCGCTACGCCCCCGGC
SPI1	hTFtarget	NC_037357.1:14356363-14358362	1936	1947	+	11.8947	2.07e-05	0.0821	GCGCGCCAGTGC
CDK9	hTFtarget	NC_037357.1:14356363-14358362	753	768	+	12.8333	2.07e-05	0.0785	GGGAAGGGAAGAGACA
AR	database	NC_037357.1:14356363-14358362	794	820	+	10.4268	2.08e-05	0.081	TTTATGGGCAGATTCTGTTCTGCTTCT
TRIM28	hTFtarget	NC_037357.1:14356363-14358362	913	931	+	10.0482	2.08e-05	0.0818	AGGGGTCCTGAGCTAGGGC
AR	hTFtarget	NC_037357.1:14356363-14358362	800	815	+	12.6364	2.08e-05	0.082	GGCAGATTCTGTTCTG
AR	hTFtarget	NC_037357.1:14356363-14358362	833	848	+	12.7121	2.09e-05	0.0828	GGGTACATGGTGAACC
SPI1	hTFtarget	NC_037357.1:14356363-14358362	1936	1947	-	12.2763	2.09e-05	0.0415	GCACTGGCGCGC
AR	hTFtarget	NC_037357.1:14356363-14358362	833	848	+	12.803	2.09e-05	0.0827	GGGTACATGGTGAACC
ETS1	hTFtarget	NC_037357.1:14356363-14358362	1961	1976	+	12.4429	2.1e-05	0.0835	CGCAAGCTCCGCGGCA
SP1	hTFtarget	NC_037357.1:14356363-14358362	1924	1932	+	12.0395	2.1e-05	0.0836	GCTACGCCC
SPI1	hTFtarget	NC_037357.1:14356363-14358362	1924	1935	-	12.75	2.1e-05	0.0831	CGGGGGCGTAGC
AP2	database	NC_037357.1:14356363-14358362	1926	1938	+	12.7172	2.11e-05	0.0418	TACGCCCCCGGCG
MED1	hTFtarget	NC_037357.1:14356363-14358362	754	769	+	12.7465	2.11e-05	0.0811	GGAAGGGAAGAGACAC
NCOR2	hTFtarget	NC_037357.1:14356363-14358362	504	515	+	13.0658	2.11e-05	0.0832	CAGCTTCCTTTT
SPI1	hTFtarget	NC_037357.1:14356363-14358362	1666	1681	+	12.7429	2.11e-05	0.0821	TGGAGGCGGAATTTGG
CREB1	hTFtarget	NC_037357.1:14356363-14358362	1923	1934	-	11.4868	2.11e-05	0.0839	GGGGGCGTAGCG
EP300	hTFtarget	NC_037357.1:14356363-14358362	1970	1994	-	10.8182	2.11e-05	0.041	CGCCTCGCGCCCATTGCTTGCCGCG
MAZ	hTFtarget	NC_037357.1:14356363-14358362	1984	1999	+	10.2368	2.12e-05	0.0843	GGCGCGAGGCGCCGGG
BCL11A	hTFtarget	NC_037357.1:14356363-14358362	953	961	-	13.75	2.12e-05	0.083	AAATTCCAG
SPI1	hTFtarget	NC_037357.1:14356363-14358362	1904	1919	+	12	2.12e-05	0.084	GCTAGCTCTAGTGGTC
SPI1	hTFtarget	NC_037357.1:14356363-14358362	1666	1681	-	12.7	2.12e-05	0.0829	CCAAATTCCGCCTCCA
HLF	database	NC_037357.1:14356363-14358362	1051	1062	-	12.5545	2.13e-05	0.0849	GGTGACATAATA
ZEB1	database	NC_037357.1:14356363-14358362	1570	1578	+	11.1927	2.13e-05	0.0424	CCGTTTCAG
AR	hTFtarget	NC_037357.1:14356363-14358362	800	815	+	12.6061	2.13e-05	0.0839	GGCAGATTCTGTTCTG
NFATC1	hTFtarget	NC_037357.1:14356363-14358362	1633	1644	-	12.0263	2.13e-05	0.0841	CTCACACGCGCA
POU5F1	hTFtarget	NC_037357.1:14356363-14358362	1654	1675	+	11.9342	2.13e-05	0.0278	GGGAGTGAAGGATGGAGGCGGA
SPI1	hTFtarget	NC_037357.1:14356363-14358362	1924	1935	+	12.7429	2.13e-05	0.0841	GCTACGCCCCCG
SPI1	hTFtarget	NC_037357.1:14356363-14358362	1924	1935	-	12.7429	2.13e-05	0.083	CGGGGGCGTAGC
FOXK1	hTFtarget	NC_037357.1:14356363-14358362	95	103	+	12.8169	2.14e-05	0.0839	GTGTATGTG
GTF2I	hTFtarget	NC_037357.1:14356363-14358362	357	376	+	11.4079	2.14e-05	0.0756	AAGATGATGCCTAGAGATTT
MYC	hTFtarget	NC_037357.1:14356363-14358362	1982	1997	+	12.7286	2.14e-05	0.085	TGGGCGCGAGGCGCCG
SPI1	hTFtarget	NC_037357.1:14356363-14358362	757	768	-	12.9342	2.14e-05	0.0515	TGTCTCTTCCCT
ELF1	hTFtarget	NC_037357.1:14356363-14358362	1886	1897	-	13.1184	2.14e-05	0.0834	TTTCCTCGTTCG
GABPA	hTFtarget	NC_037357.1:14356363-14358362	1947	1958	-	13.0758	2.15e-05	0.0851	ACGCCGGAAGAG
NCOR1	hTFtarget	NC_037357.1:14356363-14358362	1959	1970	-	11.7429	2.15e-05	0.0854	GGAGCTTGCGCC
SP2	hTFtarget	NC_037357.1:14356363-14358362	1666	1679	-	12.9286	2.15e-05	0.085	AAATTCCGCCTCCA
SPI1	hTFtarget	NC_037357.1:14356363-14358362	752	763	-	12.9286	2.15e-05	0.0849	CTTCCCTTCCCC
TCF7L2	hTFtarget	NC_037357.1:14356363-14358362	1734	1743	+	12.6883	2.15e-05	0.0833	TCAGCAAACA
GATA1	hTFtarget	NC_037357.1:14356363-14358362	656	674	+	12.7121	2.16e-05	0.0855	TTCTAGGAGCAGATAAAAC
EWSR1	hTFtarget	NC_037357.1:14356363-14358362	754	772	+	0.409091	2.16e-05	0.0271	GGAAGGGAAGAGACACAGA
NRF1	hTFtarget	NC_037357.1:14356363-14358362	1959	1969	-	12.4737	2.16e-05	0.0587	GAGCTTGCGCC
TRIM28	hTFtarget	NC_037357.1:14356363-14358362	1173	1188	+	12.0779	2.16e-05	0.0858	AATTCTGTCTACAGAC
POU2F3	database	NC_037357.1:14356363-14358362	1531	1542	-	12.0629	2.16e-05	0.0379	ATGCATAGGCAA
MEIS1	database	NC_037357.1:14356363-14358362	683	694	-	12.6939	2.17e-05	0.0855	CAGTGACAGATT
NCOR1	hTFtarget	NC_037357.1:14356363-14358362	1955	1972	+	10.3182	2.17e-05	0.043	GCGTGGCGCAAGCTCCGC
SPI1	hTFtarget	NC_037357.1:14356363-14358362	1919	1934	-	12.2286	2.17e-05	0.0425	GGGGGCGTAGCGCCTG
SRC	hTFtarget	NC_037357.1:14356363-14358362	1919	1940	-	11.3947	2.17e-05	0.0756	CGCGCCGGGGGCGTAGCGCCTG
ERG	hTFtarget	NC_037357.1:14356363-14358362	262	286	-	-18	2.17e-05	0.0161	TCTCCCAGCTTCTACTCCTTTCTTC
CDX1	database	NC_037357.1:14356363-14358362	793	800	+	10.7826	2.18e-05	0.0849	ATTTATGG
CDX2	database	NC_037357.1:14356363-14358362	793	800	+	10.9891	2.18e-05	0.0856	ATTTATGG
NR3C1	database	NC_037357.1:14356363-14358362	800	815	+	11.1835	2.18e-05	0.086	GGCAGATTCTGTTCTG
GATA3	hTFtarget	NC_037357.1:14356363-14358362	665	673	+	11.7424	2.18e-05	0.0863	CAGATAAAA
CDX1	database	NC_037357.1:14356363-14358362	793	800	-	10.7723	2.18e-05	0.0849	CCATAAAT
CDX4	database	NC_037357.1:14356363-14358362	793	800	-	10.9901	2.18e-05	0.0859	CCATAAAT
FLI1	hTFtarget	NC_037357.1:14356363-14358362	746	763	+	-7.51515	2.19e-05	0.032	GGAGTGGGGGAAGGGAAG
STAT1	hTFtarget	NC_037357.1:14356363-14358362	1459	1474	-	7.36842	2.19e-05	0.0861	CTACCCCTTTTCCACA
STAT1	hTFtarget	NC_037357.1:14356363-14358362	1459	1474	-	7.36842	2.19e-05	0.0861	CTACCCCTTTTCCACA
EP300	hTFtarget	NC_037357.1:14356363-14358362	1732	1743	-	12.4722	2.19e-05	0.0861	TGTTTGCTGAAT
ERG	hTFtarget	NC_037357.1:14356363-14358362	1946	1956	-	13.0429	2.19e-05	0.0869	GCCGGAAGAGC
ERG	hTFtarget	NC_037357.1:14356363-14358362	1946	1959	+	13.0758	2.2e-05	0.0872	GCTCTTCCGGCGTG
GABPA	hTFtarget	NC_037357.1:14356363-14358362	1942	1956	+	12.7879	2.2e-05	0.0871	CAGTGCTCTTCCGGC
LYL1	hTFtarget	NC_037357.1:14356363-14358362	654	673	-	12.9342	2.2e-05	0.0873	TTTTATCTGCTCCTAGAAAC
SPI1	hTFtarget	NC_037357.1:14356363-14358362	1947	1955	+	13.0263	2.2e-05	0.0871	CTCTTCCGG
TCF4	hTFtarget	NC_037357.1:14356363-14358362	509	524	-	12.7273	2.2e-05	0.043	TCAGAGTTCAAAAGGA
TRIM28	hTFtarget	NC_037357.1:14356363-14358362	1145	1166	-	11.026	2.2e-05	0.056	TTGGGTTCTTTGCCTTCAAAGA
CHD1	hTFtarget	NC_037357.1:14356363-14358362	1925	1940	-	12.1842	2.2e-05	0.087	CGCGCCGGGGGCGTAG
EP300	hTFtarget	NC_037357.1:14356363-14358362	504	515	-	12.7429	2.2e-05	0.0872	AAAAGGAAGCTG
GABPA	hTFtarget	NC_037357.1:14356363-14358362	1945	1956	-	13	2.21e-05	0.0876	GCCGGAAGAGCA
GTF2I	hTFtarget	NC_037357.1:14356363-14358362	1549	1564	+	12.5256	2.21e-05	0.0849	TTGAGAGAGAAAAAAA
IRF1	hTFtarget	NC_037357.1:14356363-14358362	85	104	+	11.5352	2.21e-05	0.0855	AGGAGGGAAAGTGTATGTGG
MYC	hTFtarget	NC_037357.1:14356363-14358362	1946	1957	+	13.1974	2.21e-05	0.0867	GCTCTTCCGGCG
FLI1	hTFtarget	NC_037357.1:14356363-14358362	748	772	+	5.12121	2.22e-05	0.0251	AGTGGGGGAAGGGAAGAGACACAGA
TP53	hTFtarget	NC_037357.1:14356363-14358362	753	772	+	3.57746	2.22e-05	0.086	GGGAAGGGAAGAGACACAGA
ELK1	hTFtarget	NC_037357.1:14356363-14358362	1945	1956	-	12.8788	2.22e-05	0.0882	GCCGGAAGAGCA
SPI1	hTFtarget	NC_037357.1:14356363-14358362	1935	1950	+	12.0921	2.23e-05	0.0544	GGCGCGCCAGTGCTCT
AR	hTFtarget	NC_037357.1:14356363-14358362	1733	1744	-	12.6528	2.24e-05	0.088	ATGTTTGCTGAA
NFAT5	database	NC_037357.1:14356363-14358362	1854	1865	+	13.4587	2.25e-05	0.0542	GAAAAACTCTCT
ETS1	hTFtarget	NC_037357.1:14356363-14358362	1949	1957	+	13	2.25e-05	0.0894	CTTCCGGCG
HIF1A	hTFtarget	NC_037357.1:14356363-14358362	1551	1566	-	12.5974	2.25e-05	0.0627	ATTTTTTTTCTCTCTC
BCL3	hTFtarget	NC_037357.1:14356363-14358362	1628	1644	-	11.4085	2.25e-05	0.0688	CTCACACGCGCACCCCC
PRKDC	hTFtarget	NC_037357.1:14356363-14358362	1598	1608	+	12.6571	2.25e-05	0.0888	GCCGTCACTCT
SPI1	hTFtarget	NC_037357.1:14356363-14358362	1632	1643	+	12.5	2.26e-05	0.0449	GTGCGCGTGTGA
EP300	hTFtarget	NC_037357.1:14356363-14358362	1734	1743	+	12.8052	2.26e-05	0.0889	TCAGCAAACA
YY1	database	NC_037357.1:14356363-14358362	1305	1315	-	11.6517	2.27e-05	0.0894	CTCTCCATTTT
NFATC1	hTFtarget	NC_037357.1:14356363-14358362	1632	1651	+	9.11429	2.27e-05	0.0897	GTGCGCGTGTGAGTTACTGA
SMAD1	hTFtarget	NC_037357.1:14356363-14358362	1976	1997	-	9.43421	2.27e-05	0.0298	CGGCGCCTCGCGCCCATTGCTT
SPI1	hTFtarget	NC_037357.1:14356363-14358362	1667	1682	+	12.2857	2.27e-05	0.0445	GGAGGCGGAATTTGGG
TAL1	hTFtarget	NC_037357.1:14356363-14358362	503	514	-	12.9342	2.27e-05	0.0894	AAAGGAAGCTGA
MEIS3	database	NC_037357.1:14356363-14358362	1764	1775	-	12.1138	2.27e-05	0.0899	CGACACCTGGCA
HNF1A	database	NC_037357.1:14356363-14358362	726	740	+	12.6111	2.28e-05	0.0827	AGTTAATGAATAGCT
SPI1	hTFtarget	NC_037357.1:14356363-14358362	1919	1934	+	12.5286	2.28e-05	0.0447	CAGGCGCTACGCCCCC
SPI1	hTFtarget	NC_037357.1:14356363-14358362	1937	1948	-	11.7895	2.28e-05	0.0907	AGCACTGGCGCG
ZNF143	hTFtarget	NC_037357.1:14356363-14358362	1981	2000	-	11.3857	2.28e-05	0.089	TCCCGGCGCCTCGCGCCCAT
SPI1	hTFtarget	NC_037357.1:14356363-14358362	1920	1935	+	11.7571	2.29e-05	0.0853	AGGCGCTACGCCCCCG
ERG	hTFtarget	NC_037357.1:14356363-14358362	1927	1942	-	10.4079	2.29e-05	0.091	GGCGCGCCGGGGGCGT
POU2F3	database	NC_037357.1:14356363-14358362	1365	1376	+	12.0286	2.29e-05	0.0379	ATGCATATGAAT
PRDM1	database	NC_037357.1:14356363-14358362	84	98	+	12.4	2.3e-05	0.0877	CAGGAGGGAAAGTGT
FLI1	hTFtarget	NC_037357.1:14356363-14358362	751	766	-	-16.9697	2.3e-05	0.0319	TCTCTTCCCTTCCCCC
FOXM1	hTFtarget	NC_037357.1:14356363-14358362	1734	1745	+	13.0779	2.3e-05	0.0899	TCAGCAAACATT
MBD2	database	NC_037357.1:14356363-14358362	1930	1940	-	13.1939	2.3e-05	0.0915	CGCGCCGGGGG
POLR2A	hTFtarget	NC_037357.1:14356363-14358362	504	515	-	12.7763	2.31e-05	0.0675	AAAAGGAAGCTG
SPI1	hTFtarget	NC_037357.1:14356363-14358362	1626	1637	-	12.4342	2.31e-05	0.0459	GCGCACCCCCAA
ZNF263	hTFtarget	NC_037357.1:14356363-14358362	1653	1674	+	11.7792	2.31e-05	0.0372	TGGGAGTGAAGGATGGAGGCGG
MBD2	database	NC_037357.1:14356363-14358362	1930	1940	-	13.1974	2.32e-05	0.0923	CGCGCCGGGGG
GTF2I	database	NC_037357.1:14356363-14358362	1663	1671	+	13.3333	2.32e-05	0.091	GGATGGAGG
LEF1:TCF1	database	NC_037357.1:14356363-14358362	879	889	-	13.0808	2.33e-05	0.0458	ACTTTGATGAT
FLI1	hTFtarget	NC_037357.1:14356363-14358362	76	100	+	-14.75	2.33e-05	0.029	AGAGAAGTCAGGAGGGAAAGTGTAT
GABPA	hTFtarget	NC_037357.1:14356363-14358362	1947	1958	-	12.8182	2.33e-05	0.0928	ACGCCGGAAGAG
C17orf96	hTFtarget	NC_037357.1:14356363-14358362	483	507	-	12.3671	2.33e-05	0.0295	GCTGAAGCAAAAGAGGGGAGTAAGA
ERG	hTFtarget	NC_037357.1:14356363-14358362	1734	1744	-	12.6234	2.34e-05	0.0924	ATGTTTGCTGA
IRF2	hTFtarget	NC_037357.1:14356363-14358362	779	790	+	12.9221	2.34e-05	0.091	GAAGAGAAACTG
MAZ	hTFtarget	NC_037357.1:14356363-14358362	746	761	-	12.0909	2.34e-05	0.0916	TCCCTTCCCCCACTCC
ZNF32	database	NC_037357.1:14356363-14358362	1201	1209	-	8.6465	2.34e-05	0.0914	TATATATGT
MED1	hTFtarget	NC_037357.1:14356363-14358362	1446	1454	-	12.9079	2.35e-05	0.0819	CCCAAGGGA
CREB1	hTFtarget	NC_037357.1:14356363-14358362	1650	1674	-	11.9459	2.35e-05	0.0175	CCGCCTCCATCCTTCACTCCCAATC
ELF1	hTFtarget	NC_037357.1:14356363-14358362	1946	1959	+	12.6212	2.35e-05	0.0931	GCTCTTCCGGCGTG
EOMES	hTFtarget	NC_037357.1:14356363-14358362	1042	1062	-	12.4394	2.35e-05	0.0462	GGTGACATAATAGTGTGTGAA
POU3F3	database	NC_037357.1:14356363-14358362	1365	1376	+	11.2914	2.35e-05	0.0357	ATGCATATGAAT
ERG	hTFtarget	NC_037357.1:14356363-14358362	506	514	-	12.9605	2.36e-05	0.0931	AAAGGAAGC
GABPA	hTFtarget	NC_037357.1:14356363-14358362	1948	1956	+	12.8429	2.36e-05	0.0939	TCTTCCGGC
HOXA9	hTFtarget	NC_037357.1:14356363-14358362	1225	1236	-	12.6667	2.36e-05	0.0911	TTGATTTATGAA
KLF5	hTFtarget	NC_037357.1:14356363-14358362	1920	1935	-	12.7576	2.36e-05	0.0933	CGGGGGCGTAGCGCCT
MYC	hTFtarget	NC_037357.1:14356363-14358362	1667	1678	-	12.3421	2.36e-05	0.0464	AATTCCGCCTCC
PCGF2	hTFtarget	NC_037357.1:14356363-14358362	753	774	-	12.4605	2.36e-05	0.0456	ATTCTGTGTCTCTTCCCTTCCC
SP2	hTFtarget	NC_037357.1:14356363-14358362	1947	1955	+	13.1184	2.36e-05	0.0934	CTCTTCCGG
SPI1	hTFtarget	NC_037357.1:14356363-14358362	392	408	+	11.1667	2.36e-05	0.0737	GAAAGGGGATGAGAATC
SPI1	hTFtarget	NC_037357.1:14356363-14358362	1924	1935	-	12.4429	2.36e-05	0.0917	CGGGGGCGTAGC
MYPOP	database	NC_037357.1:14356363-14358362	1958	1967	-	13.0204	2.36e-05	0.0939	GCTTGCGCCA
HDAC2	hTFtarget	NC_037357.1:14356363-14358362	1265	1280	-	12.2821	2.37e-05	0.0911	AGTTAAATATTAATGG
MYC	hTFtarget	NC_037357.1:14356363-14358362	754	768	-	12.5455	2.37e-05	0.0895	TGTCTCTTCCCTTCC
FLI1	hTFtarget	NC_037357.1:14356363-14358362	76	97	-	7.62121	2.38e-05	0.045	CACTTTCCCTCCTGACTTCTCT
IRF3	hTFtarget	NC_037357.1:14356363-14358362	753	768	+	12.5325	2.38e-05	0.0451	GGGAAGGGAAGAGACA
MYB	hTFtarget	NC_037357.1:14356363-14358362	504	515	+	12.9211	2.38e-05	0.0921	CAGCTTCCTTTT
NRF1	hTFtarget	NC_037357.1:14356363-14358362	1960	1970	-	11.7286	2.38e-05	0.0712	GGAGCTTGCGC
RCOR1	hTFtarget	NC_037357.1:14356363-14358362	496	511	+	11.8592	2.38e-05	0.0464	TTTTGCTTCAGCTTCC
TAL1	hTFtarget	NC_037357.1:14356363-14358362	656	671	-	12.6667	2.38e-05	0.091	TTATCTGCTCCTAGAA
TOP1	hTFtarget	NC_037357.1:14356363-14358362	22	33	-	12.6579	2.38e-05	0.0468	CAAAAACAGGGA
GABPA	hTFtarget	NC_037357.1:14356363-14358362	1947	1958	+	12.9091	2.39e-05	0.095	CTCTTCCGGCGT
SPI1	hTFtarget	NC_037357.1:14356363-14358362	1924	1935	-	12.25	2.39e-05	0.0941	CGGGGGCGTAGC
AR	hTFtarget	NC_037357.1:14356363-14358362	1735	1743	+	12.5972	2.39e-05	0.0934	CAGCAAACA
MEIS2	database	NC_037357.1:14356363-14358362	680	692	-	12.3788	2.4e-05	0.0906	GTGACAGATTGCA
EZH2	hTFtarget	NC_037357.1:14356363-14358362	752	767	-	12.2987	2.4e-05	0.0306	GTCTCTTCCCTTCCCC
MED1	hTFtarget	NC_037357.1:14356363-14358362	263	278	-	12.5195	2.4e-05	0.0705	CTTCTACTCCTTTCTT
NRF1	hTFtarget	NC_037357.1:14356363-14358362	1960	1973	+	10.2424	2.4e-05	0.0844	GCGCAAGCTCCGCG
GABPA	database	NC_037357.1:14356363-14358362	1945	1955	-	12.9344	2.41e-05	0.0956	CCGGAAGAGCA
SNAI1	database	NC_037357.1:14356363-14358362	1761	1774	-	12.8991	2.41e-05	0.0956	GACACCTGGCATTG
NRF1	hTFtarget	NC_037357.1:14356363-14358362	1959	1970	-	11.0132	2.41e-05	0.0936	GGAGCTTGCGCC
MEIS2	database	NC_037357.1:14356363-14358362	680	692	+	12.3571	2.41e-05	0.0927	TGCAATCTGTCAC
HNF1B	database	NC_037357.1:14356363-14358362	726	739	+	12.3529	2.42e-05	0.0476	AGTTAATGAATAGC
ESR1	hTFtarget	NC_037357.1:14356363-14358362	1654	1675	+	11.2836	2.42e-05	0.0232	GGGAGTGAAGGATGGAGGCGGA
ZMIZ1	hTFtarget	NC_037357.1:14356363-14358362	653	672	+	12.7424	2.42e-05	0.0959	GGTTTCTAGGAGCAGATAAA
ELF1	hTFtarget	NC_037357.1:14356363-14358362	1946	1959	-	12.2121	2.42e-05	0.0957	CACGCCGGAAGAGC
HNF1B	database	NC_037357.1:14356363-14358362	726	739	-	12.3333	2.42e-05	0.0478	GCTATTCATTAACT
GLYR1	hTFtarget	NC_037357.1:14356363-14358362	269	290	-	5.23684	2.43e-05	0.0482	CAGCTCTCCCAGCTTCTACTCC
NCOR2	hTFtarget	NC_037357.1:14356363-14358362	1928	1939	+	12.5132	2.44e-05	0.0968	CGCCCCCGGCGC
HOXC8	database	NC_037357.1:14356363-14358362	789	802	-	12.5941	2.44e-05	0.0967	GCCCATAAATGACA
ZNF423	database	NC_037357.1:14356363-14358362	644	658	+	-1.39796	2.44e-05	0.0967	GCAACCTAAGGTTTC
ETS2	database	NC_037357.1:14356363-14358362	1946	1956	-	11.9	2.45e-05	0.0966	GCCGGAAGAGC
VSX2	database	NC_037357.1:14356363-14358362	1752	1762	-	12.9082	2.45e-05	0.0975	TGATTAGCTTA
GATA3	hTFtarget	NC_037357.1:14356363-14358362	1732	1743	+	12.6944	2.45e-05	0.0953	ATTCAGCAAACA
GATA4	hTFtarget	NC_037357.1:14356363-14358362	953	961	-	12.6143	2.45e-05	0.0963	AAATTCCAG
E2F4	hTFtarget	NC_037357.1:14356363-14358362	1983	1998	-	12.6515	2.45e-05	0.0972	CCGGCGCCTCGCGCCC
EBF1	database	NC_037357.1:14356363-14358362	1445	1456	-	12.6531	2.45e-05	0.0484	CTCCCAAGGGAG
ETS2	database	NC_037357.1:14356363-14358362	1946	1956	-	11.8889	2.45e-05	0.0961	GCCGGAAGAGC
EBF1	database	NC_037357.1:14356363-14358362	1445	1456	-	12.6897	2.46e-05	0.0484	CTCCCAAGGGAG
HOXC8	database	NC_037357.1:14356363-14358362	789	802	+	12.5536	2.46e-05	0.0975	TGTCATTTATGGGC
FLI1	hTFtarget	NC_037357.1:14356363-14358362	77	92	+	5.19697	2.46e-05	0.047	GAGAAGTCAGGAGGGA
STAT1	hTFtarget	NC_037357.1:14356363-14358362	486	497	-	12.0526	2.46e-05	0.0953	AAGAGGGGAGTA
STAT1	hTFtarget	NC_037357.1:14356363-14358362	748	763	-	12.507	2.46e-05	0.0472	CTTCCCTTCCCCCACT
TAL1	hTFtarget	NC_037357.1:14356363-14358362	1109	1124	-	12.3553	2.46e-05	0.0962	TACAGGATATATCTGC
SOX14	database	NC_037357.1:14356363-14358362	1128	1140	-	10.9898	2.46e-05	0.0974	ATAATATCATTGA
NRF1	database	NC_037357.1:14356363-14358362	1959	1969	-	12.2545	2.47e-05	0.0981	GAGCTTGCGCC
KDM5A	hTFtarget	NC_037357.1:14356363-14358362	1947	1955	+	13.1711	2.47e-05	0.0975	CTCTTCCGG
MAX	hTFtarget	NC_037357.1:14356363-14358362	749	764	+	12.4545	2.47e-05	0.0953	GTGGGGGAAGGGAAGA
SIN3A	hTFtarget	NC_037357.1:14356363-14358362	1947	1955	+	12.6842	2.47e-05	0.0978	CTCTTCCGG
SPI1	hTFtarget	NC_037357.1:14356363-14358362	1666	1681	-	11.7714	2.47e-05	0.0485	CCAAATTCCGCCTCCA
TAF1	hTFtarget	NC_037357.1:14356363-14358362	1948	1956	-	12.9342	2.47e-05	0.0983	GCCGGAAGA
EGR1	hTFtarget	NC_037357.1:14356363-14358362	1626	1647	+	12.1282	2.47e-05	0.0387	TTGGGGGTGCGCGTGTGAGTTA
AR	hTFtarget	NC_037357.1:14356363-14358362	800	815	+	12.5	2.47e-05	0.0611	GGCAGATTCTGTTCTG
ERG	hTFtarget	NC_037357.1:14356363-14358362	1947	1958	-	12.7857	2.47e-05	0.0982	ACGCCGGAAGAG
AR	hTFtarget	NC_037357.1:14356363-14358362	799	814	-	12.303	2.48e-05	0.0977	AGAACAGAATCTGCCC
SPI1	hTFtarget	NC_037357.1:14356363-14358362	1924	1935	-	12.3684	2.48e-05	0.0977	CGGGGGCGTAGC
SPI1	hTFtarget	NC_037357.1:14356363-14358362	1666	1681	-	11.8158	2.48e-05	0.0978	CCAAATTCCGCCTCCA
ERG	hTFtarget	NC_037357.1:14356363-14358362	754	765	+	13.0921	2.48e-05	0.0974	GGAAGGGAAGAG
VSX2	database	NC_037357.1:14356363-14358362	1752	1762	+	12.898	2.48e-05	0.0987	TAAGCTAATCA
SPI1	hTFtarget	NC_037357.1:14356363-14358362	1666	1681	-	12.2286	2.49e-05	0.0978	CCAAATTCCGCCTCCA
FOXA2	hTFtarget	NC_037357.1:14356363-14358362	1923	1944	+	10.7792	2.5e-05	0.0614	CGCTACGCCCCCGGCGCGCCAG
PRKDC	hTFtarget	NC_037357.1:14356363-14358362	1599	1608	+	12.4429	2.5e-05	0.0996	CCGTCACTCT
BRD4	hTFtarget	NC_037357.1:14356363-14358362	739	760	-	12.0779	2.5e-05	0.0158	CCCTTCCCCCACTCCAACCCAG
E2F6	database	NC_037357.1:14356363-14358362	1982	1993	+	12.5688	2.5e-05	0.0941	TGGGCGCGAGGC
E2F6	database	NC_037357.1:14356363-14358362	1982	1993	+	12.5918	2.51e-05	0.0931	TGGGCGCGAGGC
FLI1	hTFtarget	NC_037357.1:14356363-14358362	1656	1671	-	-17.197	2.51e-05	0.0319	CCTCCATCCTTCACTC
GABPA	hTFtarget	NC_037357.1:14356363-14358362	1947	1958	-	12.8485	2.51e-05	0.0997	ACGCCGGAAGAG
EP300	hTFtarget	NC_037357.1:14356363-14358362	760	774	-	12.2436	2.51e-05	0.0823	ATTCTGTGTCTCTTC
ZNF423	database	NC_037357.1:14356363-14358362	644	658	-	-1.88776	2.52e-05	0.1	GAAACCTTAGGTTGC
MAZ	hTFtarget	NC_037357.1:14356363-14358362	745	760	-	12.4416	2.52e-05	0.0303	CCCTTCCCCCACTCCA
FLI1	hTFtarget	NC_037357.1:14356363-14358362	1655	1672	+	-8.16667	2.53e-05	0.032	GGAGTGAAGGATGGAGGC
PRAME	hTFtarget	NC_037357.1:14356363-14358362	1924	1935	-	12.6316	2.53e-05	0.101	CGGGGGCGTAGC
TRIM28	hTFtarget	NC_037357.1:14356363-14358362	753	766	+	7.36842	2.53e-05	0.0325	GGGAAGGGAAGAGA
TRIM28	hTFtarget	NC_037357.1:14356363-14358362	78	89	+	12.6579	2.53e-05	0.0594	AGAAGTCAGGAG
MAZ	hTFtarget	NC_037357.1:14356363-14358362	1656	1671	-	12.4286	2.54e-05	0.0303	CCTCCATCCTTCACTC
POU5F1	hTFtarget	NC_037357.1:14356363-14358362	262	277	+	12.3846	2.54e-05	0.0965	GAAGAAAGGAGTAGAA
RELA	hTFtarget	NC_037357.1:14356363-14358362	1954	1974	+	9.39474	2.54e-05	0.0502	GGCGTGGCGCAAGCTCCGCGG
SP2	hTFtarget	NC_037357.1:14356363-14358362	1662	1685	-	10.8816	2.54e-05	0.0379	GCTCCCAAATTCCGCCTCCATCCT
SP2	hTFtarget	NC_037357.1:14356363-14358362	1916	1939	+	10.8816	2.54e-05	0.0379	GGTCAGGCGCTACGCCCCCGGCGC
TCF7L2	database	NC_037357.1:14356363-14358362	509	522	-	12.8	2.55e-05	0.0501	AGAGTTCAAAAGGA
ATF3	database	NC_037357.1:14356363-14358362	1327	1340	-	12.018	2.55e-05	0.0507	CTGTGATGTCTGTG
AR	hTFtarget	NC_037357.1:14356363-14358362	800	815	+	12.3788	2.55e-05	0.082	GGCAGATTCTGTTCTG
IRF1	hTFtarget	NC_037357.1:14356363-14358362	1920	1935	-	11.7727	2.55e-05	0.1	CGGGGGCGTAGCGCCT
GABPA	hTFtarget	NC_037357.1:14356363-14358362	1947	1958	+	12.803	2.56e-05	0.101	CTCTTCCGGCGT
IKZF1	hTFtarget	NC_037357.1:14356363-14358362	1545	1560	-	12.4211	2.56e-05	0.0496	TTTCTCTCTCAAATCC
SPI1	hTFtarget	NC_037357.1:14356363-14358362	1667	1682	+	11.6714	2.56e-05	0.05	GGAGGCGGAATTTGGG
SPI1	hTFtarget	NC_037357.1:14356363-14358362	1661	1682	+	9.9	2.56e-05	0.0498	AAGGATGGAGGCGGAATTTGGG
HNF4A	hTFtarget	NC_037357.1:14356363-14358362	1281	1292	-	12.7632	2.57e-05	0.0965	GAGGTTCAAAGG
BRD2	hTFtarget	NC_037357.1:14356363-14358362	999	1011	-	11.3947	2.57e-05	0.0655	CACATGTTCACAT
SPI1	hTFtarget	NC_037357.1:14356363-14358362	1924	1935	-	12.4714	2.57e-05	0.101	CGGGGGCGTAGC
TAL1	hTFtarget	NC_037357.1:14356363-14358362	1108	1123	+	11.9079	2.57e-05	0.102	AGCAGATATATCCTGT
TRIM28	hTFtarget	NC_037357.1:14356363-14358362	74	95	+	12.1974	2.57e-05	0.0492	ACAGAGAAGTCAGGAGGGAAAG
EHF	hTFtarget	NC_037357.1:14356363-14358362	746	767	+	12.3836	2.57e-05	0.0323	GGAGTGGGGGAAGGGAAGAGAC
E2F4	database	NC_037357.1:14356363-14358362	1983	1993	+	13.1379	2.58e-05	0.103	GGGCGCGAGGC
FOS	hTFtarget	NC_037357.1:14356363-14358362	1924	1935	-	12.3026	2.58e-05	0.102	CGGGGGCGTAGC
GABPA	hTFtarget	NC_037357.1:14356363-14358362	1948	1956	-	12.6	2.58e-05	0.103	GCCGGAAGA
GATA3	hTFtarget	NC_037357.1:14356363-14358362	665	673	+	12.2571	2.58e-05	0.102	CAGATAAAA
GATA3	hTFtarget	NC_037357.1:14356363-14358362	56	67	-	12.0303	2.58e-05	0.0563	GAATGTTATCAC
GTF3C2	hTFtarget	NC_037357.1:14356363-14358362	497	512	+	10.6265	2.58e-05	0.0992	TTTGCTTCAGCTTCCT
SPI1	hTFtarget	NC_037357.1:14356363-14358362	1949	1957	+	12.8026	2.58e-05	0.102	CTTCCGGCG
SPI1	hTFtarget	NC_037357.1:14356363-14358362	1666	1681	-	12.1711	2.58e-05	0.101	CCAAATTCCGCCTCCA
TCF4	database	NC_037357.1:14356363-14358362	881	889	-	11.4148	2.59e-05	0.101	ACTTTGATG
AR	database	NC_037357.1:14356363-14358362	801	815	+	11.6951	2.59e-05	0.0999	GCAGATTCTGTTCTG
GTF2I	hTFtarget	NC_037357.1:14356363-14358362	911	932	-	10.8816	2.59e-05	0.0504	AGCCCTAGCTCAGGACCCCTGA
SPI1	hTFtarget	NC_037357.1:14356363-14358362	1924	1935	-	11.9605	2.59e-05	0.102	CGGGGGCGTAGC
STAT1	hTFtarget	NC_037357.1:14356363-14358362	753	768	-	12.3718	2.59e-05	0.0458	TGTCTCTTCCCTTCCC
EBF1	hTFtarget	NC_037357.1:14356363-14358362	1445	1456	+	12.4848	2.59e-05	0.0513	CTCCCTTGGGAG
MYC	hTFtarget	NC_037357.1:14356363-14358362	87	102	-	10.6286	2.6e-05	0.0335	ACATACACTTTCCCTC
SPI1	hTFtarget	NC_037357.1:14356363-14358362	1664	1679	-	12.4571	2.6e-05	0.0537	AAATTCCGCCTCCATC
FLI1	hTFtarget	NC_037357.1:14356363-14358362	78	99	-	-6.54286	2.61e-05	0.026	TACACTTTCCCTCCTGACTTCT
AR	hTFtarget	NC_037357.1:14356363-14358362	800	815	+	12.4242	2.61e-05	0.0509	GGCAGATTCTGTTCTG
NFYB	hTFtarget	NC_037357.1:14356363-14358362	1924	1935	-	12.3289	2.61e-05	0.103	CGGGGGCGTAGC
PBX3	hTFtarget	NC_037357.1:14356363-14358362	1598	1608	-	12.697	2.61e-05	0.104	AGAGTGACGGC
SPI1	hTFtarget	NC_037357.1:14356363-14358362	1662	1683	+	11.7714	2.61e-05	0.0507	AGGATGGAGGCGGAATTTGGGA
SPI1	hTFtarget	NC_037357.1:14356363-14358362	1919	1934	-	11.9143	2.61e-05	0.0515	GGGGGCGTAGCGCCTG
ELK1	hTFtarget	NC_037357.1:14356363-14358362	791	802	+	12.5263	2.61e-05	0.104	TCATTTATGGGC
FLI1	hTFtarget	NC_037357.1:14356363-14358362	763	787	-	-22.8857	2.62e-05	0.0334	TTTCTCTTCATTCATTCTGTGTCTC
AR	hTFtarget	NC_037357.1:14356363-14358362	799	814	+	12.2857	2.62e-05	0.103	GGGCAGATTCTGTTCT
RELA	hTFtarget	NC_037357.1:14356363-14358362	1960	1971	-	11.1316	2.62e-05	0.104	CGGAGCTTGCGC
ESR1	hTFtarget	NC_037357.1:14356363-14358362	758	782	+	11.4179	2.63e-05	0.0198	GGGAAGAGACACAGAATGAATGAAG
NFYB	hTFtarget	NC_037357.1:14356363-14358362	1923	1934	+	11.4868	2.63e-05	0.104	CGCTACGCCCCC
ZC3H8	hTFtarget	NC_037357.1:14356363-14358362	1051	1062	-	12.7792	2.63e-05	0.105	GGTGACATAATA
NR2E3	database	NC_037357.1:14356363-14358362	1222	1235	+	9.75758	2.64e-05	0.103	GGATTCATAAATCA
ESR1	hTFtarget	NC_037357.1:14356363-14358362	1091	1101	-	11.5658	2.64e-05	0.104	ATTTCACTCCA
SPI1	hTFtarget	NC_037357.1:14356363-14358362	1905	1920	+	12.1053	2.64e-05	0.105	CTAGCTCTAGTGGTCA
CDX2	hTFtarget	NC_037357.1:14356363-14358362	1732	1743	+	12.7792	2.64e-05	0.104	ATTCAGCAAACA
SP4	database	NC_037357.1:14356363-14358362	1922	1945	-	9.55556	2.64e-05	0.0344	ACTGGCGCGCCGGGGGCGTAGCGC
FOXP3	database	NC_037357.1:14356363-14358362	711	719	+	12.4685	2.65e-05	0.103	AATGTGATT
SOX5	database	NC_037357.1:14356363-14358362	1426	1433	+	11.6506	2.65e-05	0.104	TAACAATA
FLI1	hTFtarget	NC_037357.1:14356363-14358362	262	286	-	-22.9571	2.65e-05	0.0334	TCTCCCAGCTTCTACTCCTTTCTTC
GABPA	hTFtarget	NC_037357.1:14356363-14358362	1945	1956	-	12.3939	2.65e-05	0.105	GCCGGAAGAGCA
NCOR1	hTFtarget	NC_037357.1:14356363-14358362	1629	1644	+	12.2632	2.65e-05	0.0525	GGGGTGCGCGTGTGAG
SRF	hTFtarget	NC_037357.1:14356363-14358362	1527	1551	-	10.5789	2.65e-05	0.105	CAAATCCCAATGCATAGGCAACTGA
FOXP3	database	NC_037357.1:14356363-14358362	711	719	-	12.54	2.65e-05	0.104	AATCACATT
SOX5	database	NC_037357.1:14356363-14358362	1426	1433	+	11.63	2.65e-05	0.103	TAACAATA
AR	hTFtarget	NC_037357.1:14356363-14358362	800	815	-	12.3939	2.66e-05	0.0569	CAGAACAGAATCTGCC
IKZF1	database	NC_037357.1:14356363-14358362	1450	1457	+	12.0244	2.67e-05	0.0965	TTGGGAGA
ESR1	hTFtarget	NC_037357.1:14356363-14358362	1800	1815	+	12.5395	2.67e-05	0.106	GACCAGGCTCGCACCC
SPI1	hTFtarget	NC_037357.1:14356363-14358362	309	324	-	12.3289	2.67e-05	0.0527	CGTGGAGATGTCCCAG
SPI1	hTFtarget	NC_037357.1:14356363-14358362	1924	1935	-	11.9605	2.67e-05	0.106	CGGGGGCGTAGC
IKZF4	database	NC_037357.1:14356363-14358362	1450	1457	+	12	2.67e-05	0.0965	TTGGGAGA
GABPA	hTFtarget	NC_037357.1:14356363-14358362	1942	1956	+	12.3939	2.68e-05	0.106	CAGTGCTCTTCCGGC
PIAS1	hTFtarget	NC_037357.1:14356363-14358362	1736	1744	+	11.6528	2.68e-05	0.105	AGCAAACAT
SPI1	hTFtarget	NC_037357.1:14356363-14358362	752	763	-	12.6579	2.68e-05	0.0515	CTTCCCTTCCCC
EWSR1	hTFtarget	NC_037357.1:14356363-14358362	71	90	+	7.35484	2.69e-05	0.0491	GAAACAGAGAAGTCAGGAGG
RELA	hTFtarget	NC_037357.1:14356363-14358362	1960	1971	-	11.5395	2.69e-05	0.107	CGGAGCTTGCGC
CEBPA	hTFtarget	NC_037357.1:14356363-14358362	1954	1969	-	12.9848	2.69e-05	0.106	GAGCTTGCGCCACGCC
EP300	hTFtarget	NC_037357.1:14356363-14358362	1525	1533	-	11.4857	2.69e-05	0.106	CAACTGACA
ERG	hTFtarget	NC_037357.1:14356363-14358362	1946	1956	+	12.7714	2.7e-05	0.107	GCTCTTCCGGC
NCOR1	hTFtarget	NC_037357.1:14356363-14358362	1960	1971	-	11.4857	2.7e-05	0.107	CGGAGCTTGCGC
NFYA	hTFtarget	NC_037357.1:14356363-14358362	1595	1608	-	12.7237	2.7e-05	0.107	AGAGTGACGGCAGA
SPI1	hTFtarget	NC_037357.1:14356363-14358362	1922	1937	+	12.3857	2.7e-05	0.0537	GCGCTACGCCCCCGGC
SPI1	hTFtarget	NC_037357.1:14356363-14358362	1666	1681	+	12.4	2.7e-05	0.105	TGGAGGCGGAATTTGG
ERG	hTFtarget	NC_037357.1:14356363-14358362	1946	1959	+	12.5758	2.71e-05	0.107	GCTCTTCCGGCGTG
KDM5B	hTFtarget	NC_037357.1:14356363-14358362	751	766	-	12.25	2.71e-05	0.0618	TCTCTTCCCTTCCCCC
NRF1	hTFtarget	NC_037357.1:14356363-14358362	1932	1947	-	11.6579	2.71e-05	0.0538	GCACTGGCGCGCCGGG
SETDB1	hTFtarget	NC_037357.1:14356363-14358362	219	230	-	12.3684	2.71e-05	0.106	GCAGAGCTCATT
E2F4	database	NC_037357.1:14356363-14358362	1980	1993	+	12.3871	2.72e-05	0.108	AATGGGCGCGAGGC
YY1	hTFtarget	NC_037357.1:14356363-14358362	1667	1682	-	10.75	2.72e-05	0.0634	CCCAAATTCCGCCTCC
EOMES	hTFtarget	NC_037357.1:14356363-14358362	1273	1284	-	12.5789	2.72e-05	0.0765	AAGGAGTTAAAT
FOXA1	hTFtarget	NC_037357.1:14356363-14358362	834	848	-	12.3571	2.73e-05	0.106	GGTTCACCATGTACC
AR	hTFtarget	NC_037357.1:14356363-14358362	1733	1743	-	12.4722	2.73e-05	0.108	TGTTTGCTGAA
BRD4	hTFtarget	NC_037357.1:14356363-14358362	1931	1955	+	9.89474	2.73e-05	0.068	CCCCGGCGCGCCAGTGCTCTTCCGG
BRD4	hTFtarget	NC_037357.1:14356363-14358362	1630	1645	-	12.1786	2.73e-05	0.107	ACTCACACGCGCACCC
SPI1	hTFtarget	NC_037357.1:14356363-14358362	1920	1935	+	12.3429	2.73e-05	0.0805	AGGCGCTACGCCCCCG
VDR	hTFtarget	NC_037357.1:14356363-14358362	778	789	-	12.5584	2.73e-05	0.106	AGTTTCTCTTCA
AR	database	NC_037357.1:14356363-14358362	833	848	+	12.2323	2.73e-05	0.0542	GGGTACATGGTGAACC
SRF	database	NC_037357.1:14356363-14358362	790	804	-	12.1545	2.73e-05	0.108	CTGCCCATAAATGAC
RUNX1	hTFtarget	NC_037357.1:14356363-14358362	504	515	+	12.4	2.74e-05	0.108	CAGCTTCCTTTT
SPI1	hTFtarget	NC_037357.1:14356363-14358362	1666	1681	-	12.0857	2.74e-05	0.0578	CCAAATTCCGCCTCCA
SPI1	hTFtarget	NC_037357.1:14356363-14358362	1920	1935	+	11.9286	2.74e-05	0.0568	AGGCGCTACGCCCCCG
SPI1	hTFtarget	NC_037357.1:14356363-14358362	1957	1972	-	11.6842	2.74e-05	0.0544	GCGGAGCTTGCGCCAC
ZBTB17	hTFtarget	NC_037357.1:14356363-14358362	437	452	-	10.0658	2.74e-05	0.106	AACTCTGGTCCTCCTG
CTCF	hTFtarget	NC_037357.1:14356363-14358362	1983	1998	-	10.4697	2.74e-05	0.109	CCGGCGCCTCGCGCCC
AR	hTFtarget	NC_037357.1:14356363-14358362	834	849	+	12.3182	2.74e-05	0.0687	GGTACATGGTGAACCA
AR	database	NC_037357.1:14356363-14358362	833	848	-	12.25	2.75e-05	0.0539	GGTTCACCATGTACCC
NFAT5	database	NC_037357.1:14356363-14358362	367	378	-	13.1743	2.75e-05	0.0542	GGAAATCTCTAG
BCL6	hTFtarget	NC_037357.1:14356363-14358362	653	664	+	12.25	2.77e-05	0.109	GGTTTCTAGGAG
TP53	hTFtarget	NC_037357.1:14356363-14358362	1461	1485	+	11.2692	2.77e-05	0.0711	TGGAAAAGGGGTAGCAGCTTTTCAC
EP300	hTFtarget	NC_037357.1:14356363-14358362	953	961	-	12.8947	2.77e-05	0.109	AAATTCCAG
E2F4	database	NC_037357.1:14356363-14358362	1980	1993	+	12.3387	2.77e-05	0.11	AATGGGCGCGAGGC
SRF	database	NC_037357.1:14356363-14358362	790	804	+	12.1	2.78e-05	0.11	GTCATTTATGGGCAG
EWSR1	hTFtarget	NC_037357.1:14356363-14358362	75	94	+	7.27419	2.78e-05	0.0491	CAGAGAAGTCAGGAGGGAAA
RFX5	hTFtarget	NC_037357.1:14356363-14358362	1596	1617	+	12	2.78e-05	0.11	CTGCCGTCACTCTTGAACAAGG
STAT4	hTFtarget	NC_037357.1:14356363-14358362	385	399	-	12.1667	2.78e-05	0.11	CCCCTTTCCACTCAG
SPIC	database	NC_037357.1:14356363-14358362	1463	1476	+	12.2727	2.78e-05	0.111	GAAAAGGGGTAGCA
ARRB1	hTFtarget	NC_037357.1:14356363-14358362	1091	1101	+	12.3506	2.79e-05	0.111	TGGAGTGAAAT
SPI1	hTFtarget	NC_037357.1:14356363-14358362	1666	1681	-	12.3286	2.79e-05	0.109	CCAAATTCCGCCTCCA
ZNF143	hTFtarget	NC_037357.1:14356363-14358362	940	948	+	12.8947	2.79e-05	0.111	GAACTACAC
CREBBP	hTFtarget	NC_037357.1:14356363-14358362	75	95	+	-9.25714	2.79e-05	0.0386	CAGAGAAGTCAGGAGGGAAAG
ARNT2	database	NC_037357.1:14356363-14358362	1954	1965	+	12.2727	2.8e-05	0.111	GGCGTGGCGCAA
SOX17	database	NC_037357.1:14356363-14358362	1385	1402	+	9.31707	2.8e-05	0.107	ACACAATTTAGTATTGTC
AR	database	NC_037357.1:14356363-14358362	833	847	+	12.7308	2.8e-05	0.0969	GGGTACATGGTGAAC
FLI1	hTFtarget	NC_037357.1:14356363-14358362	78	91	-	-7.30263	2.8e-05	0.0355	CCCTCCTGACTTCT
EP300	hTFtarget	NC_037357.1:14356363-14358362	15	30	+	12.4737	2.8e-05	0.11	CATGACATCCCTGTTT
TWIST1	database	NC_037357.1:14356363-14358362	1764	1773	+	12.9837	2.81e-05	0.112	TGCCAGGTGT
FOXA1	hTFtarget	NC_037357.1:14356363-14358362	93	108	+	9.39437	2.81e-05	0.111	AAGTGTATGTGGATGT
FOXP1	hTFtarget	NC_037357.1:14356363-14358362	872	883	-	12.4211	2.81e-05	0.11	ATGATGACGGTG
SP2	hTFtarget	NC_037357.1:14356363-14358362	845	856	+	12.3286	2.81e-05	0.112	AACCATTGAGGG
SPI1	hTFtarget	NC_037357.1:14356363-14358362	1919	1934	+	12.1974	2.81e-05	0.111	CAGGCGCTACGCCCCC
IRF1	hTFtarget	NC_037357.1:14356363-14358362	496	511	+	12.3286	2.82e-05	0.0479	TTTTGCTTCAGCTTCC
BCL3	hTFtarget	NC_037357.1:14356363-14358362	1000	1015	-	11.9697	2.82e-05	0.0558	CTTGCACATGTTCACA
NFYB	hTFtarget	NC_037357.1:14356363-14358362	483	498	-	5.90789	2.82e-05	0.11	AAAGAGGGGAGTAAGA
ZNF274	hTFtarget	NC_037357.1:14356363-14358362	1319	1338	+	5.88158	2.82e-05	0.112	AATTGTATCACAGACATCAC
ARNT2	database	NC_037357.1:14356363-14358362	1954	1965	-	12.2828	2.82e-05	0.112	TTGCGCCACGCC
TWIST2	database	NC_037357.1:14356363-14358362	1003	1014	-	12.0505	2.82e-05	0.112	TTGCACATGTTC
EZH2	hTFtarget	NC_037357.1:14356363-14358362	1463	1478	+	10.9221	2.83e-05	0.0995	GAAAAGGGGTAGCAGC
BCL6	hTFtarget	NC_037357.1:14356363-14358362	653	664	+	12.1972	2.83e-05	0.112	GGTTTCTAGGAG
TAF1	hTFtarget	NC_037357.1:14356363-14358362	1661	1674	-	11.0132	2.83e-05	0.112	CCGCCTCCATCCTT
SP4	database	NC_037357.1:14356363-14358362	1922	1945	-	9.34343	2.84e-05	0.0369	ACTGGCGCGCCGGGGGCGTAGCGC
EP300	hTFtarget	NC_037357.1:14356363-14358362	752	767	-	7.22368	2.84e-05	0.0549	GTCTCTTCCCTTCCCC
AR	hTFtarget	NC_037357.1:14356363-14358362	256	271	+	10.1579	2.85e-05	0.11	ACTGGTGAAGAAAGGA
GABPA	hTFtarget	NC_037357.1:14356363-14358362	1945	1956	-	12.5909	2.85e-05	0.113	GCCGGAAGAGCA
BRD2	hTFtarget	NC_037357.1:14356363-14358362	1631	1645	-	12.0429	2.85e-05	0.113	ACTCACACGCGCACC
REST	hTFtarget	NC_037357.1:14356363-14358362	311	322	-	11.2895	2.85e-05	0.112	TGGAGATGTCCC
SPI1	hTFtarget	NC_037357.1:14356363-14358362	1920	1935	+	12	2.85e-05	0.0637	AGGCGCTACGCCCCCG
GABPA	hTFtarget	NC_037357.1:14356363-14358362	1947	1955	+	12.8182	2.86e-05	0.114	CTCTTCCGG
GATA6	hTFtarget	NC_037357.1:14356363-14358362	55	66	+	12.5152	2.86e-05	0.113	GGTGATAACATT
ASCL1	hTFtarget	NC_037357.1:14356363-14358362	272	283	+	12.5352	2.86e-05	0.112	GTAGAAGCTGGG
PBX3	hTFtarget	NC_037357.1:14356363-14358362	1923	1934	-	11.5	2.86e-05	0.108	GGGGGCGTAGCG
TAF1	hTFtarget	NC_037357.1:14356363-14358362	1661	1674	-	10.9211	2.86e-05	0.114	CCGCCTCCATCCTT
YY1	hTFtarget	NC_037357.1:14356363-14358362	1947	1955	+	12.7105	2.86e-05	0.114	CTCTTCCGG
EGR1	hTFtarget	NC_037357.1:14356363-14358362	1923	1938	-	12	2.86e-05	0.112	CGCCGGGGGCGTAGCG
ESR1	hTFtarget	NC_037357.1:14356363-14358362	1414	1432	-	10.1974	2.87e-05	0.11	ATTGTTAAATTAATAGCTA
KDM1A	hTFtarget	NC_037357.1:14356363-14358362	664	674	-	12.4857	2.87e-05	0.112	GTTTTATCTGC
ZNF143	hTFtarget	NC_037357.1:14356363-14358362	1985	2000	+	11.3026	2.87e-05	0.114	GCGCGAGGCGCCGGGA
ERG	hTFtarget	NC_037357.1:14356363-14358362	747	758	-	12.4079	2.87e-05	0.0379	CTTCCCCCACTC
GATA3	hTFtarget	NC_037357.1:14356363-14358362	506	514	-	12.4868	2.88e-05	0.114	AAAGGAAGC
BRD4	hTFtarget	NC_037357.1:14356363-14358362	746	767	+	12.0641	2.88e-05	0.0272	GGAGTGGGGGAAGGGAAGAGAC
SPI1	hTFtarget	NC_037357.1:14356363-14358362	1901	1922	+	10.4737	2.88e-05	0.114	GCTGCTAGCTCTAGTGGTCAGG
SPIB	hTFtarget	NC_037357.1:14356363-14358362	752	763	+	12.25	2.88e-05	0.111	GGGGAAGGGAAG
CTCF	hTFtarget	NC_037357.1:14356363-14358362	1984	1999	-	10.1212	2.88e-05	0.114	CCCGGCGCCTCGCGCC
PLAG1	database	NC_037357.1:14356363-14358362	387	400	+	8.14286	2.89e-05	0.114	GAGTGGAAAGGGGA
ESR1	hTFtarget	NC_037357.1:14356363-14358362	753	774	+	0.760563	2.89e-05	0.0371	GGGAAGGGAAGAGACACAGAAT
GATA1	hTFtarget	NC_037357.1:14356363-14358362	95	103	-	13.0429	2.89e-05	0.115	CACATACAC
GATA3	hTFtarget	NC_037357.1:14356363-14358362	665	676	-	11.9394	2.89e-05	0.0563	GGGTTTTATCTG
SP2	hTFtarget	NC_037357.1:14356363-14358362	1922	1945	+	10.6053	2.89e-05	0.0379	GCGCTACGCCCCCGGCGCGCCAGT
SPI1	hTFtarget	NC_037357.1:14356363-14358362	1923	1933	-	12.1711	2.89e-05	0.115	GGGGCGTAGCG
TRIM28	hTFtarget	NC_037357.1:14356363-14358362	1	22	-	10.4805	2.89e-05	0.056	ATGTCATGCTTGTATTTCCCTA
CDK7	hTFtarget	NC_037357.1:14356363-14358362	1983	1998	-	11.2895	2.89e-05	0.114	CCGGCGCCTCGCGCCC
AR	hTFtarget	NC_037357.1:14356363-14358362	801	816	+	12.1818	2.89e-05	0.113	GCAGATTCTGTTCTGC
EP300	hTFtarget	NC_037357.1:14356363-14358362	804	819	-	11.9571	2.89e-05	0.0452	GAAGCAGAACAGAATC
TWIST1	database	NC_037357.1:14356363-14358362	1764	1773	+	13.0612	2.89e-05	0.115	TGCCAGGTGT
ERG	hTFtarget	NC_037357.1:14356363-14358362	46	64	+	12.5143	2.9e-05	0.072	AAGGAAAATGGTGATAACA
AR	hTFtarget	NC_037357.1:14356363-14358362	799	814	+	12.3026	2.9e-05	0.0572	GGGCAGATTCTGTTCT
GABPA	hTFtarget	NC_037357.1:14356363-14358362	1945	1958	+	12.5152	2.9e-05	0.115	TGCTCTTCCGGCGT
PCGF2	hTFtarget	NC_037357.1:14356363-14358362	746	767	-	12.2632	2.9e-05	0.0392	GTCTCTTCCCTTCCCCCACTCC
PPARG	hTFtarget	NC_037357.1:14356363-14358362	1453	1472	+	12.0704	2.9e-05	0.111	GGAGACTGTGGAAAAGGGGT
RBL2	hTFtarget	NC_037357.1:14356363-14358362	86	94	+	12.6184	2.9e-05	0.115	GGAGGGAAA
CLOCK	hTFtarget	NC_037357.1:14356363-14358362	1667	1678	-	12.4868	2.9e-05	0.114	AATTCCGCCTCC
NR1I2	database	NC_037357.1:14356363-14358362	514	532	-	12.1573	2.91e-05	0.115	CTTGGTCATCAGAGTTCAA
HNF1A	database	NC_037357.1:14356363-14358362	726	736	+	12.013	2.91e-05	0.0594	AGTTAATGAAT
GLYR1	hTFtarget	NC_037357.1:14356363-14358362	1357	1378	-	4.72368	2.91e-05	0.0482	CAATTCATATGCATTGGCTTTC
GTF3C2	hTFtarget	NC_037357.1:14356363-14358362	928	943	+	11.8289	2.91e-05	0.115	GGGCTACACAGAGAAC
HCFC1	hTFtarget	NC_037357.1:14356363-14358362	1947	1955	+	12.8026	2.91e-05	0.116	CTCTTCCGG
MEIS1	hTFtarget	NC_037357.1:14356363-14358362	1225	1236	-	12.3333	2.91e-05	0.114	TTGATTTATGAA
RUNX1	hTFtarget	NC_037357.1:14356363-14358362	1947	1955	-	12.8947	2.91e-05	0.116	CCGGAAGAG
SPI1	hTFtarget	NC_037357.1:14356363-14358362	1666	1681	-	11.8143	2.91e-05	0.0568	CCAAATTCCGCCTCCA
CBFB	hTFtarget	NC_037357.1:14356363-14358362	1945	1959	+	12.3158	2.91e-05	0.114	TGCTCTTCCGGCGTG
EZH1	hTFtarget	NC_037357.1:14356363-14358362	1985	2000	+	11.5658	2.92e-05	0.116	GCGCGAGGCGCCGGGA
AR	hTFtarget	NC_037357.1:14356363-14358362	833	848	+	12.2727	2.92e-05	0.0569	GGGTACATGGTGAACC
AR	hTFtarget	NC_037357.1:14356363-14358362	1732	1743	+	12.4167	2.92e-05	0.114	ATTCAGCAAACA
POU5F1	hTFtarget	NC_037357.1:14356363-14358362	94	109	-	11.8636	2.92e-05	0.0572	TACATCCACATACACT
POU5F1	hTFtarget	NC_037357.1:14356363-14358362	1202	1217	+	11.8636	2.92e-05	0.0572	CATATATAGATGCTCA
SPI1	hTFtarget	NC_037357.1:14356363-14358362	1660	1681	-	11.0143	2.92e-05	0.0563	CCAAATTCCGCCTCCATCCTTC
TP53	hTFtarget	NC_037357.1:14356363-14358362	751	766	+	11.9118	2.92e-05	0.0745	GGGGGAAGGGAAGAGA
YY1	hTFtarget	NC_037357.1:14356363-14358362	1305	1313	+	12.1842	2.92e-05	0.115	AAAATGGAG
GATA1	hTFtarget	NC_037357.1:14356363-14358362	99	114	+	11.5984	2.93e-05	0.0569	ATGTGGATGTAGTGTG
ZNF274	hTFtarget	NC_037357.1:14356363-14358362	877	892	-	11.0143	2.93e-05	0.114	AGTACTTTGATGATGA
ETS1	hTFtarget	NC_037357.1:14356363-14358362	1946	1957	+	12.5909	2.94e-05	0.116	GCTCTTCCGGCG
MED1	hTFtarget	NC_037357.1:14356363-14358362	754	769	+	12.2338	2.94e-05	0.0789	GGAAGGGAAGAGACAC
RELA	hTFtarget	NC_037357.1:14356363-14358362	1960	1971	-	11.2895	2.94e-05	0.117	CGGAGCTTGCGC
SPI1	hTFtarget	NC_037357.1:14356363-14358362	1923	1934	+	11.9342	2.94e-05	0.117	CGCTACGCCCCC
EP300	hTFtarget	NC_037357.1:14356363-14358362	953	961	-	12.8816	2.94e-05	0.115	AAATTCCAG
NRF1	hTFtarget	NC_037357.1:14356363-14358362	1628	1638	+	11.8816	2.95e-05	0.0587	GGGGGTGCGCG
NRF1	hTFtarget	NC_037357.1:14356363-14358362	1960	1972	+	11.3816	2.95e-05	0.117	GCGCAAGCTCCGC
CTCF	hTFtarget	NC_037357.1:14356363-14358362	1983	1998	-	8.84286	2.95e-05	0.117	CCGGCGCCTCGCGCCC
ZBTB14	database	NC_037357.1:14356363-14358362	1983	1990	+	12.1782	2.96e-05	0.118	GGGCGCGA
RELA	hTFtarget	NC_037357.1:14356363-14358362	1958	1973	+	9.27143	2.96e-05	0.0695	TGGCGCAAGCTCCGCG
BRD4	hTFtarget	NC_037357.1:14356363-14358362	94	109	-	11.9615	2.96e-05	0.117	TACATCCACATACACT
ZBTB33	hTFtarget	NC_037357.1:14356363-14358362	484	492	-	12.3947	2.96e-05	0.116	GGGAGTAAG
CTCF	hTFtarget	NC_037357.1:14356363-14358362	1983	1998	-	10.2273	2.96e-05	0.117	CCGGCGCCTCGCGCCC
ELF1	hTFtarget	NC_037357.1:14356363-14358362	1948	1956	-	13.5921	2.96e-05	0.118	GCCGGAAGA
SPI1	hTFtarget	NC_037357.1:14356363-14358362	752	766	-	11.2576	2.97e-05	0.116	TCTCTTCCCTTCCCC
SPI1	hTFtarget	NC_037357.1:14356363-14358362	1937	1948	-	10.6316	2.97e-05	0.118	AGCACTGGCGCG
SPI1	hTFtarget	NC_037357.1:14356363-14358362	1905	1920	-	11.4079	2.97e-05	0.117	TGACCACTAGAGCTAG
TCF12	hTFtarget	NC_037357.1:14356363-14358362	1929	1937	-	12.5658	2.97e-05	0.118	GCCGGGGGC
ZBTB33	hTFtarget	NC_037357.1:14356363-14358362	1667	1682	-	10.9605	2.97e-05	0.064	CCCAAATTCCGCCTCC
CTCF	hTFtarget	NC_037357.1:14356363-14358362	1983	1998	-	9.89394	2.97e-05	0.118	CCGGCGCCTCGCGCCC
ELK3	hTFtarget	NC_037357.1:14356363-14358362	751	766	+	11.4868	2.97e-05	0.0384	GGGGGAAGGGAAGAGA
NFATC1	database	NC_037357.1:14356363-14358362	954	966	+	12.1061	2.98e-05	0.118	TGGAATTTTACTT
SMAD1	hTFtarget	NC_037357.1:14356363-14358362	656	673	+	12.4697	2.98e-05	0.104	TTCTAGGAGCAGATAAAA
SPI1	hTFtarget	NC_037357.1:14356363-14358362	1658	1682	-	9.35714	2.98e-05	0.0579	CCCAAATTCCGCCTCCATCCTTCAC
TCF4	hTFtarget	NC_037357.1:14356363-14358362	1928	1949	-	9.96053	2.98e-05	0.0459	GAGCACTGGCGCGCCGGGGGCG
TFDP1	hTFtarget	NC_037357.1:14356363-14358362	1983	1998	-	12.1974	2.98e-05	0.118	CCGGCGCCTCGCGCCC
NRF1	hTFtarget	NC_037357.1:14356363-14358362	1625	1638	+	11.2237	2.99e-05	0.0539	GTTGGGGGTGCGCG
POU5F1	hTFtarget	NC_037357.1:14356363-14358362	226	237	-	12.013	2.99e-05	0.116	ATTGAATGCAGA
SPI1	hTFtarget	NC_037357.1:14356363-14358362	1920	1935	+	11.9286	2.99e-05	0.0578	AGGCGCTACGCCCCCG
EP300	hTFtarget	NC_037357.1:14356363-14358362	754	769	+	11.9	2.99e-05	0.0452	GGAAGGGAAGAGACAC
EP300	hTFtarget	NC_037357.1:14356363-14358362	753	766	+	8.2	2.99e-05	0.0384	GGGAAGGGAAGAGA
AR	hTFtarget	NC_037357.1:14356363-14358362	833	848	+	12.1667	2.99e-05	0.0584	GGGTACATGGTGAACC
POU2F3	database	NC_037357.1:14356363-14358362	1365	1376	-	11.7429	2.99e-05	0.0379	ATTCATATGCAT
PCGF2	hTFtarget	NC_037357.1:14356363-14358362	754	775	-	12.2105	3e-05	0.0392	CATTCTGTGTCTCTTCCCTTCC
SPI1	hTFtarget	NC_037357.1:14356363-14358362	1662	1677	-	12.0263	3e-05	0.0591	ATTCCGCCTCCATCCT
CEBPD	hTFtarget	NC_037357.1:14356363-14358362	657	672	-	12.3636	3e-05	0.119	TTTATCTGCTCCTAGA
TOPORS	database	NC_037357.1:14356363-14358362	647	663	+	-6.81633	3e-05	0.0394	ACCTAAGGTTTCTAGGA
ERMAP	hTFtarget	NC_037357.1:14356363-14358362	754	765	+	12.2	3.01e-05	0.118	GGAAGGGAAGAG
FLI1	hTFtarget	NC_037357.1:14356363-14358362	754	775	-	-7.12857	3.01e-05	0.026	CATTCTGTGTCTCTTCCCTTCC
PPARG	hTFtarget	NC_037357.1:14356363-14358362	1457	1472	+	12.0606	3.01e-05	0.0639	ACTGTGGAAAAGGGGT
SMAD1	hTFtarget	NC_037357.1:14356363-14358362	754	767	+	12.0519	3.01e-05	0.0915	GGAAGGGAAGAGAC
SPI1	hTFtarget	NC_037357.1:14356363-14358362	1904	1919	+	10.6711	3.01e-05	0.12	GCTAGCTCTAGTGGTC
TAL1	hTFtarget	NC_037357.1:14356363-14358362	48	65	+	12.4429	3.01e-05	0.104	GGAAAATGGTGATAACAT
GLYR1	hTFtarget	NC_037357.1:14356363-14358362	1288	1307	+	9.18072	3.02e-05	0.116	ACCTCAGTTTCTTCTATAAA
HNF1B	hTFtarget	NC_037357.1:14356363-14358362	1753	1770	+	11.8472	3.02e-05	0.0592	AAGCTAATCAATGCCAGG
SETDB1	hTFtarget	NC_037357.1:14356363-14358362	126	141	-	9.97368	3.02e-05	0.0576	CAAATTCATCTCTCCA
SIX5	hTFtarget	NC_037357.1:14356363-14358362	1947	1955	+	13.0132	3.02e-05	0.12	CTCTTCCGG
SPI1	hTFtarget	NC_037357.1:14356363-14358362	1924	1935	-	11.7763	3.02e-05	0.118	CGGGGGCGTAGC
BTAF1	hTFtarget	NC_037357.1:14356363-14358362	739	763	-	1.21053	3.02e-05	0.0489	CTTCCCTTCCCCCACTCCAACCCAG
ELK1	hTFtarget	NC_037357.1:14356363-14358362	1947	1955	+	12.9079	3.02e-05	0.12	CTCTTCCGG
HNF1A	database	NC_037357.1:14356363-14358362	1263	1283	+	11.8172	3.03e-05	0.0582	AACCATTAATATTTAACTCCT
AR	hTFtarget	NC_037357.1:14356363-14358362	799	814	+	12.169	3.03e-05	0.105	GGGCAGATTCTGTTCT
AR	hTFtarget	NC_037357.1:14356363-14358362	1733	1743	-	12.2361	3.03e-05	0.117	TGTTTGCTGAA
SPI1	hTFtarget	NC_037357.1:14356363-14358362	1666	1681	-	11.9211	3.03e-05	0.118	CCAAATTCCGCCTCCA
SUZ12	hTFtarget	NC_037357.1:14356363-14358362	1666	1681	-	11.8158	3.03e-05	0.117	CCAAATTCCGCCTCCA
TAF1	hTFtarget	NC_037357.1:14356363-14358362	267	290	+	11.7632	3.03e-05	0.0389	AAGGAGTAGAAGCTGGGAGAGCTG
BCL6	hTFtarget	NC_037357.1:14356363-14358362	502	513	-	12.1286	3.04e-05	0.12	AAGGAAGCTGAA
TAF1	hTFtarget	NC_037357.1:14356363-14358362	1662	1673	+	11.3289	3.04e-05	0.121	AGGATGGAGGCG
TP53	hTFtarget	NC_037357.1:14356363-14358362	761	776	+	11.9265	3.04e-05	0.116	AAGAGACACAGAATGA
TRIM28	hTFtarget	NC_037357.1:14356363-14358362	1893	1904	+	12.3553	3.04e-05	0.0594	GGAAAGCCGCTG
CEBPD	database	NC_037357.1:14356363-14358362	1815	1825	-	11.7108	3.05e-05	0.119	AATTGGGCAAG
PR	database	NC_037357.1:14356363-14358362	794	820	+	11.2805	3.05e-05	0.12	TTTATGGGCAGATTCTGTTCTGCTTCT
FLI1	hTFtarget	NC_037357.1:14356363-14358362	743	767	-	-47.1515	3.05e-05	0.0383	GTCTCTTCCCTTCCCCCACTCCAAC
GABPA	hTFtarget	NC_037357.1:14356363-14358362	1947	1958	-	12.5909	3.05e-05	0.12	ACGCCGGAAGAG
AR	hTFtarget	NC_037357.1:14356363-14358362	833	848	-	12.1515	3.05e-05	0.0832	GGTTCACCATGTACCC
EP300	hTFtarget	NC_037357.1:14356363-14358362	507	515	-	11.9857	3.05e-05	0.121	AAAAGGAAG
CEBPD	database	NC_037357.1:14356363-14358362	1815	1825	-	11.69	3.05e-05	0.119	AATTGGGCAAG
ZNF281	database	NC_037357.1:14356363-14358362	740	754	+	11.6735	3.05e-05	0.0593	TGGGTTGGAGTGGGG
ZNF148	database	NC_037357.1:14356363-14358362	740	754	+	11.6629	3.06e-05	0.0594	TGGGTTGGAGTGGGG
HMGA1	database	NC_037357.1:14356363-14358362	1558	1572	-	10.9314	3.06e-05	0.0601	CGGTGAATTTTTTTT
SETDB1	hTFtarget	NC_037357.1:14356363-14358362	664	684	+	4.61842	3.06e-05	0.121	GCAGATAAAACCCCTATGCAA
EGR1	hTFtarget	NC_037357.1:14356363-14358362	737	758	+	11.8718	3.06e-05	0.0387	AGCTGGGTTGGAGTGGGGGAAG
GABPA	hTFtarget	NC_037357.1:14356363-14358362	1947	1955	+	12.6	3.07e-05	0.122	CTCTTCCGG
GATA3	hTFtarget	NC_037357.1:14356363-14358362	665	673	+	11.8182	3.07e-05	0.121	CAGATAAAA
SPI1	hTFtarget	NC_037357.1:14356363-14358362	1924	1935	-	11.8816	3.07e-05	0.121	CGGGGGCGTAGC
HNF1A	database	NC_037357.1:14356363-14358362	1643	1653	+	11.961	3.08e-05	0.0594	AGTTACTGATT
ZNF143	hTFtarget	NC_037357.1:14356363-14358362	1307	1322	-	12.0769	3.09e-05	0.0587	AATTACTCTCTCCATT
HNF4A	hTFtarget	NC_037357.1:14356363-14358362	515	523	-	12.5	3.1e-05	0.123	CAGAGTTCA
KDM5B	hTFtarget	NC_037357.1:14356363-14358362	763	787	+	9.66667	3.1e-05	0.0165	GAGACACAGAATGAATGAAGAGAAA
SPI1	hTFtarget	NC_037357.1:14356363-14358362	1923	1934	+	11.8026	3.1e-05	0.123	CGCTACGCCCCC
SPI1	hTFtarget	NC_037357.1:14356363-14358362	1666	1681	+	11.3857	3.1e-05	0.0836	TGGAGGCGGAATTTGG
ELF1	hTFtarget	NC_037357.1:14356363-14358362	1947	1958	+	12.5	3.1e-05	0.123	CTCTTCCGGCGT
GATA1	hTFtarget	NC_037357.1:14356363-14358362	655	673	+	12.2121	3.11e-05	0.123	TTTCTAGGAGCAGATAAAA
MYBL2	hTFtarget	NC_037357.1:14356363-14358362	1732	1743	+	12.6806	3.11e-05	0.122	ATTCAGCAAACA
SPI1	hTFtarget	NC_037357.1:14356363-14358362	1924	1935	-	11.9342	3.11e-05	0.123	CGGGGGCGTAGC
SPI1	hTFtarget	NC_037357.1:14356363-14358362	1915	1939	+	10.9857	3.11e-05	0.0612	TGGTCAGGCGCTACGCCCCCGGCGC
ZNF219	database	NC_037357.1:14356363-14358362	1623	1634	-	10.0488	3.12e-05	0.0694	CACCCCCAACAA
RFX1	database	NC_037357.1:14356363-14358362	1679	1696	+	12.2809	3.13e-05	0.124	TGGGAGCGAAGGCTACGA
ETS1	hTFtarget	NC_037357.1:14356363-14358362	1947	1955	+	12.6316	3.13e-05	0.124	CTCTTCCGG
GABPA	hTFtarget	NC_037357.1:14356363-14358362	1947	1955	-	12.5152	3.13e-05	0.124	CCGGAAGAG
SPI1	hTFtarget	NC_037357.1:14356363-14358362	1967	1991	+	11.3421	3.13e-05	0.124	CTCCGCGGCAAGCAATGGGCGCGAG
CEBPB	hTFtarget	NC_037357.1:14356363-14358362	1954	1969	-	12.9091	3.13e-05	0.124	GAGCTTGCGCCACGCC
EP300	hTFtarget	NC_037357.1:14356363-14358362	1732	1743	+	12.4583	3.13e-05	0.122	ATTCAGCAAACA
ZBTB7A	database	NC_037357.1:14356363-14358362	1932	1948	-	11.9663	3.14e-05	0.124	AGCACTGGCGCGCCGGG
IRF4	hTFtarget	NC_037357.1:14356363-14358362	779	790	+	12.2676	3.14e-05	0.122	GAAGAGAAACTG
SP1	hTFtarget	NC_037357.1:14356363-14358362	1975	1994	-	11.8286	3.14e-05	0.125	CGCCTCGCGCCCATTGCTTG
AR	hTFtarget	NC_037357.1:14356363-14358362	833	848	-	12.2121	3.14e-05	0.0611	GGTTCACCATGTACCC
ZBTB7A	database	NC_037357.1:14356363-14358362	1932	1948	-	11.9388	3.14e-05	0.125	AGCACTGGCGCGCCGGG
FOXA2	hTFtarget	NC_037357.1:14356363-14358362	1925	1946	+	10.2987	3.15e-05	0.0614	CTACGCCCCCGGCGCGCCAGTG
MAZ	hTFtarget	NC_037357.1:14356363-14358362	1680	1695	-	12.1039	3.15e-05	0.0303	CGTAGCCTTCGCTCCC
SETDB1	hTFtarget	NC_037357.1:14356363-14358362	398	413	+	10.8947	3.16e-05	0.124	GGATGAGAATCCAGAG
GLI2	hTFtarget	NC_037357.1:14356363-14358362	1924	1935	-	12.3143	3.17e-05	0.119	CGGGGGCGTAGC
MYC	hTFtarget	NC_037357.1:14356363-14358362	1983	1998	-	11.4211	3.17e-05	0.104	CCGGCGCCTCGCGCCC
SPI1	hTFtarget	NC_037357.1:14356363-14358362	1922	1936	+	11.6053	3.17e-05	0.105	GCGCTACGCCCCCGG
ZNF263	hTFtarget	NC_037357.1:14356363-14358362	387	408	+	11.2078	3.17e-05	0.0372	GAGTGGAAAGGGGATGAGAATC
EED	hTFtarget	NC_037357.1:14356363-14358362	1254	1270	-	-2.06579	3.17e-05	0.124	TAATGGTTTGAAAGGTA
SNAI1	database	NC_037357.1:14356363-14358362	1766	1773	+	13.2602	3.18e-05	0.126	CCAGGTGT
TCF3	database	NC_037357.1:14356363-14358362	1765	1772	-	12.4388	3.18e-05	0.126	CACCTGGC
ETS1	hTFtarget	NC_037357.1:14356363-14358362	1947	1955	+	12.7105	3.18e-05	0.126	CTCTTCCGG
GABPA	hTFtarget	NC_037357.1:14356363-14358362	1947	1955	+	12.7429	3.18e-05	0.127	CTCTTCCGG
BRD4	hTFtarget	NC_037357.1:14356363-14358362	739	760	+	10.3766	3.18e-05	0.0377	CTGGGTTGGAGTGGGGGAAGGG
TCF12	hTFtarget	NC_037357.1:14356363-14358362	1766	1774	-	12.8939	3.18e-05	0.126	GACACCTGG
E2F7	hTFtarget	NC_037357.1:14356363-14358362	747	762	-	9.81579	3.18e-05	0.0624	TTCCCTTCCCCCACTC
SNAI1	database	NC_037357.1:14356363-14358362	1766	1773	+	13.3469	3.18e-05	0.127	CCAGGTGT
IRF3	hTFtarget	NC_037357.1:14356363-14358362	262	286	+	9.58974	3.2e-05	0.0198	GAAGAAAGGAGTAGAAGCTGGGAGA
BACH2	hTFtarget	NC_037357.1:14356363-14358362	752	763	-	12.3117	3.2e-05	0.115	CTTCCCTTCCCC
EP300	hTFtarget	NC_037357.1:14356363-14358362	1734	1745	+	11.9444	3.2e-05	0.126	TCAGCAAACATT
ZNF384	hTFtarget	NC_037357.1:14356363-14358362	1927	1942	-	11.9737	3.21e-05	0.0636	GGCGCGCCGGGGGCGT
PAX3	database	NC_037357.1:14356363-14358362	1373	1382	+	11.9109	3.21e-05	0.0882	GAATTGATTA
FOXA1	hTFtarget	NC_037357.1:14356363-14358362	1793	1808	+	11.8333	3.22e-05	0.125	CTGAACAGACCAGGCT
PPARD/PPARG	hTFtarget	NC_037357.1:14356363-14358362	740	751	-	12.2895	3.22e-05	0.0788	CACTCCAACCCA
STAT3	hTFtarget	NC_037357.1:14356363-14358362	1254	1269	-	11.8706	3.22e-05	0.0916	AATGGTTTGAAAGGTA
HIC1	database	NC_037357.1:14356363-14358362	1627	1644	+	12.1711	3.23e-05	0.128	TGGGGGTGCGCGTGTGAG
MAZ	database	NC_037357.1:14356363-14358362	747	760	+	12.0112	3.24e-05	0.0734	GAGTGGGGGAAGGG
BCL3	hTFtarget	NC_037357.1:14356363-14358362	1631	1645	-	10.3714	3.24e-05	0.0641	ACTCACACGCGCACC
SPI1	hTFtarget	NC_037357.1:14356363-14358362	757	768	-	12.1974	3.24e-05	0.101	TGTCTCTTCCCT
FOXK1	hTFtarget	NC_037357.1:14356363-14358362	86	101	-	11.8657	3.25e-05	0.125	CATACACTTTCCCTCC
NR3C1	hTFtarget	NC_037357.1:14356363-14358362	800	814	+	12.0152	3.25e-05	0.127	GGCAGATTCTGTTCT
NRF1	hTFtarget	NC_037357.1:14356363-14358362	1627	1638	+	9.90909	3.25e-05	0.0647	TGGGGGTGCGCG
SPI1	hTFtarget	NC_037357.1:14356363-14358362	1666	1681	-	11.8421	3.25e-05	0.126	CCAAATTCCGCCTCCA
PXR:RXR	database	NC_037357.1:14356363-14358362	515	522	-	11.3273	3.26e-05	0.129	AGAGTTCA
HIF1A	hTFtarget	NC_037357.1:14356363-14358362	753	768	-	12.0909	3.26e-05	0.0627	TGTCTCTTCCCTTCCC
TCF7L2	hTFtarget	NC_037357.1:14356363-14358362	880	888	+	12.662	3.26e-05	0.0902	TCATCAAAG
NR3C1	database	NC_037357.1:14356363-14358362	804	816	+	11.0789	3.27e-05	0.128	GATTCTGTTCTGC
FLI1	hTFtarget	NC_037357.1:14356363-14358362	82	95	-	-9.17105	3.27e-05	0.0355	CTTTCCCTCCTGAC
SP2	hTFtarget	NC_037357.1:14356363-14358362	1917	1932	+	11.9211	3.27e-05	0.13	GTCAGGCGCTACGCCC
TBP	hTFtarget	NC_037357.1:14356363-14358362	1922	1933	-	10.8289	3.27e-05	0.13	GGGGCGTAGCGC
USF2	hTFtarget	NC_037357.1:14356363-14358362	500	511	+	12.1807	3.27e-05	0.0649	GCTTCAGCTTCC
AR	hTFtarget	NC_037357.1:14356363-14358362	799	814	-	12.0606	3.27e-05	0.128	AGAACAGAATCTGCCC
ERG	hTFtarget	NC_037357.1:14356363-14358362	1660	1671	-	12.1974	3.27e-05	0.0379	CCTCCATCCTTC
SPI1	hTFtarget	NC_037357.1:14356363-14358362	1666	1681	-	11.7429	3.28e-05	0.0637	CCAAATTCCGCCTCCA
AR	hTFtarget	NC_037357.1:14356363-14358362	1735	1743	+	12.0139	3.28e-05	0.129	CAGCAAACA
GABPA	hTFtarget	NC_037357.1:14356363-14358362	1948	1956	-	12.3	3.29e-05	0.131	GCCGGAAGA
SIN3A	hTFtarget	NC_037357.1:14356363-14358362	1947	1958	-	12.3947	3.29e-05	0.131	ACGCCGGAAGAG
CREB1	hTFtarget	NC_037357.1:14356363-14358362	756	771	+	11.7344	3.29e-05	0.125	AAGGGAAGAGACACAG
PGR	hTFtarget	NC_037357.1:14356363-14358362	799	814	-	11.5972	3.3e-05	0.127	AGAACAGAATCTGCCC
BRD2	hTFtarget	NC_037357.1:14356363-14358362	91	103	-	10.8816	3.3e-05	0.0655	CACATACACTTTC
TFAP4	hTFtarget	NC_037357.1:14356363-14358362	506	514	+	12.3429	3.3e-05	0.131	GCTTCCTTT
ZNF263	hTFtarget	NC_037357.1:14356363-14358362	438	446	-	13.0429	3.3e-05	0.131	GGTCCTCCT
AR	hTFtarget	NC_037357.1:14356363-14358362	1070	1091	-	11.7486	3.3e-05	0.128	AGAAATAATCAGGAACCTATAG
FLI1	hTFtarget	NC_037357.1:14356363-14358362	756	780	+	3.98485	3.31e-05	0.0251	AAGGGAAGAGACACAGAATGAATGA
JUN	hTFtarget	NC_037357.1:14356363-14358362	1051	1065	+	12.0789	3.31e-05	0.13	TATTATGTCACCACC
MYC	hTFtarget	NC_037357.1:14356363-14358362	762	770	+	12.4474	3.31e-05	0.0738	AGAGACACA
NFE2	hTFtarget	NC_037357.1:14356363-14358362	1582	1603	+	12.1154	3.31e-05	0.0433	TCTTCTTTACTTTTCTGCCGTC
RB1	hTFtarget	NC_037357.1:14356363-14358362	1978	1993	+	12.3	3.31e-05	0.0914	GCAATGGGCGCGAGGC
ELK1	hTFtarget	NC_037357.1:14356363-14358362	1945	1956	-	12.1667	3.31e-05	0.131	GCCGGAAGAGCA
PBX1	hTFtarget	NC_037357.1:14356363-14358362	1924	1935	-	12.0132	3.32e-05	0.125	CGGGGGCGTAGC
BRD3	hTFtarget	NC_037357.1:14356363-14358362	1959	1973	+	9.54545	3.32e-05	0.128	GGCGCAAGCTCCGCG
RBCK1	hTFtarget	NC_037357.1:14356363-14358362	1666	1677	-	12.0395	3.32e-05	0.131	ATTCCGCCTCCA
EP300	hTFtarget	NC_037357.1:14356363-14358362	754	772	-	-1.67105	3.32e-05	0.129	TCTGTGTCTCTTCCCTTCC
EBF1	database	NC_037357.1:14356363-14358362	1445	1455	+	12.617	3.33e-05	0.0659	CTCCCTTGGGA
ERG	hTFtarget	NC_037357.1:14356363-14358362	1944	1956	+	12.303	3.33e-05	0.132	GTGCTCTTCCGGC
EZH2	hTFtarget	NC_037357.1:14356363-14358362	749	770	-	11.9091	3.33e-05	0.0422	TGTGTCTCTTCCCTTCCCCCAC
PPARG	hTFtarget	NC_037357.1:14356363-14358362	748	763	+	11.9091	3.33e-05	0.0639	AGTGGGGGAAGGGAAG
USF2	hTFtarget	NC_037357.1:14356363-14358362	753	764	-	12.1566	3.34e-05	0.0649	TCTTCCCTTCCC
SOX17	database	NC_037357.1:14356363-14358362	1385	1402	-	9.29592	3.34e-05	0.0896	GACAATACTAAATTGTGT
CEBPB	hTFtarget	NC_037357.1:14356363-14358362	1954	1969	+	12.5152	3.35e-05	0.132	GGCGTGGCGCAAGCTC
SMARCA4	hTFtarget	NC_037357.1:14356363-14358362	1918	1942	+	11.4286	3.36e-05	0.0705	TCAGGCGCTACGCCCCCGGCGCGCC
SPI1	hTFtarget	NC_037357.1:14356363-14358362	1924	1935	-	12.1857	3.36e-05	0.133	CGGGGGCGTAGC
SPI1	hTFtarget	NC_037357.1:14356363-14358362	1923	1934	-	11.6579	3.36e-05	0.133	GGGGGCGTAGCG
TRIM28	hTFtarget	NC_037357.1:14356363-14358362	1481	1504	+	2.68421	3.36e-05	0.133	TTCACACAAGTCTGGGTATACAAT
AR	hTFtarget	NC_037357.1:14356363-14358362	801	815	+	11.8182	3.36e-05	0.133	GCAGATTCTGTTCTG
HOXA1	database	NC_037357.1:14356363-14358362	1751	1766	+	11.9075	3.37e-05	0.132	CTAAGCTAATCAATGC
TCF7L2	hTFtarget	NC_037357.1:14356363-14358362	510	521	+	12.1818	3.37e-05	0.0522	CCTTTTGAACTC
ELF1	database	NC_037357.1:14356363-14358362	1947	1956	-	12.5	3.38e-05	0.134	GCCGGAAGAG
ATF4	database	NC_037357.1:14356363-14358362	1956	1967	+	12.7064	3.38e-05	0.134	CGTGGCGCAAGC
SPI1	hTFtarget	NC_037357.1:14356363-14358362	1631	1644	-	10.2237	3.38e-05	0.134	CTCACACGCGCACC
SPI1	hTFtarget	NC_037357.1:14356363-14358362	1924	1935	-	11.4868	3.38e-05	0.133	CGGGGGCGTAGC
TCF12	hTFtarget	NC_037357.1:14356363-14358362	1732	1743	-	12.3611	3.38e-05	0.134	TGTTTGCTGAAT
CEBPB	hTFtarget	NC_037357.1:14356363-14358362	1956	1967	+	12.8939	3.38e-05	0.133	CGTGGCGCAAGC
ELF1	database	NC_037357.1:14356363-14358362	1947	1956	-	12.4796	3.38e-05	0.134	GCCGGAAGAG
ONECUT2	database	NC_037357.1:14356363-14358362	1008	1028	+	9.79464	3.39e-05	0.13	TGTGCAAGATGGATTAAATCC
NFATC1	hTFtarget	NC_037357.1:14356363-14358362	1632	1640	-	12.5921	3.39e-05	0.0675	CACGCGCAC
TAL1	hTFtarget	NC_037357.1:14356363-14358362	654	673	-	12.1212	3.39e-05	0.134	TTTTATCTGCTCCTAGAAAC
EBF1	database	NC_037357.1:14356363-14358362	1442	1455	-	12.3483	3.4e-05	0.134	TCCCAAGGGAGGTA
FLI1	hTFtarget	NC_037357.1:14356363-14358362	1582	1606	-	3.90909	3.4e-05	0.0251	AGTGACGGCAGAAAAGTAAAGAAGA
GABPA	hTFtarget	NC_037357.1:14356363-14358362	1948	1955	+	12.1714	3.4e-05	0.135	TCTTCCGG
GABPA	hTFtarget	NC_037357.1:14356363-14358362	1948	1955	+	12.1316	3.4e-05	0.135	TCTTCCGG
HNF4A	hTFtarget	NC_037357.1:14356363-14358362	512	523	+	12.3553	3.4e-05	0.133	TTTTGAACTCTG
BRD4	hTFtarget	NC_037357.1:14356363-14358362	762	786	+	11.3506	3.4e-05	0.132	AGAGACACAGAATGAATGAAGAGAA
STAT5A	hTFtarget	NC_037357.1:14356363-14358362	44	59	-	5.84211	3.4e-05	0.0853	TCACCATTTTCCTTGT
TAL1	hTFtarget	NC_037357.1:14356363-14358362	656	672	+	12.0455	3.4e-05	0.134	TTCTAGGAGCAGATAAA
TAL1	hTFtarget	NC_037357.1:14356363-14358362	46	64	+	12.3286	3.4e-05	0.0776	AAGGAAAATGGTGATAACA
GABPA	hTFtarget	NC_037357.1:14356363-14358362	1947	1955	-	12.5286	3.41e-05	0.136	CCGGAAGAG
GABPA	hTFtarget	NC_037357.1:14356363-14358362	1948	1956	-	12.2121	3.41e-05	0.135	GCCGGAAGA
REST	hTFtarget	NC_037357.1:14356363-14358362	310	321	-	11.7368	3.41e-05	0.134	GGAGATGTCCCA
SRF	hTFtarget	NC_037357.1:14356363-14358362	788	803	+	11.6714	3.41e-05	0.135	CTGTCATTTATGGGCA
ISGF3	database	NC_037357.1:14356363-14358362	802	816	+	8.79592	3.42e-05	0.0768	CAGATTCTGTTCTGC
ZEB1	database	NC_037357.1:14356363-14358362	1764	1775	-	12.3945	3.42e-05	0.136	CGACACCTGGCA
ZNF263	hTFtarget	NC_037357.1:14356363-14358362	438	446	-	12.9429	3.42e-05	0.135	GGTCCTCCT
SP1	database	NC_037357.1:14356363-14358362	1924	1934	-	11.9213	3.43e-05	0.129	GGGGGCGTAGC
FLI1	hTFtarget	NC_037357.1:14356363-14358362	77	96	-	-33.8788	3.43e-05	0.065	ACTTTCCCTCCTGACTTCTC
MED1	hTFtarget	NC_037357.1:14356363-14358362	1947	1958	-	12.4605	3.43e-05	0.136	ACGCCGGAAGAG
RFX5	hTFtarget	NC_037357.1:14356363-14358362	1742	1755	-	11.9358	3.43e-05	0.136	CTTAGCTACAAATG
TRIM28	hTFtarget	NC_037357.1:14356363-14358362	1104	1124	+	7.97368	3.43e-05	0.133	ATAAAGCAGATATATCCTGTA
CEBPB	hTFtarget	NC_037357.1:14356363-14358362	1954	1970	-	12.7576	3.43e-05	0.136	GGAGCTTGCGCCACGCC
FOXK1	hTFtarget	NC_037357.1:14356363-14358362	1631	1642	+	11.4925	3.44e-05	0.116	GGTGCGCGTGTG
NFE2	hTFtarget	NC_037357.1:14356363-14358362	745	766	-	12.0641	3.44e-05	0.0433	TCTCTTCCCTTCCCCCACTCCA
BRCA1	hTFtarget	NC_037357.1:14356363-14358362	1329	1342	-	11.4868	3.44e-05	0.137	CCCTGTGATGTCTG
REST	hTFtarget	NC_037357.1:14356363-14358362	311	322	-	10.1316	3.44e-05	0.136	TGGAGATGTCCC
ZNF274	hTFtarget	NC_037357.1:14356363-14358362	255	268	+	9.17143	3.44e-05	0.0748	TACTGGTGAAGAAA
ELK1	hTFtarget	NC_037357.1:14356363-14358362	792	800	-	12.3289	3.44e-05	0.134	CCATAAATG
EOMES	hTFtarget	NC_037357.1:14356363-14358362	1137	1148	+	12.1286	3.44e-05	0.125	TTATCAGCTCTT
LEF1	database	NC_037357.1:14356363-14358362	881	890	+	12.0404	3.45e-05	0.06	CATCAAAGTA
FLI1	hTFtarget	NC_037357.1:14356363-14358362	746	767	-	-7.7	3.45e-05	0.026	GTCTCTTCCCTTCCCCCACTCC
SPI1	hTFtarget	NC_037357.1:14356363-14358362	1924	1935	-	12	3.45e-05	0.137	CGGGGGCGTAGC
SPI1	hTFtarget	NC_037357.1:14356363-14358362	1959	1970	+	10.8421	3.45e-05	0.137	GGCGCAAGCTCC
AR	hTFtarget	NC_037357.1:14356363-14358362	1733	1743	-	12.1806	3.45e-05	0.135	TGTTTGCTGAA
AR	hTFtarget	NC_037357.1:14356363-14358362	1732	1743	-	12.4306	3.46e-05	0.134	TGTTTGCTGAAT
POLR2A	hTFtarget	NC_037357.1:14356363-14358362	755	766	+	12.1974	3.46e-05	0.0675	GAAGGGAAGAGA
SPI1	hTFtarget	NC_037357.1:14356363-14358362	752	766	-	12.1053	3.46e-05	0.0708	TCTCTTCCCTTCCCC
CBX3	hTFtarget	NC_037357.1:14356363-14358362	388	403	+	11.6282	3.46e-05	0.0766	AGTGGAAAGGGGATGA
ELF1	hTFtarget	NC_037357.1:14356363-14358362	1948	1956	-	12.8158	3.46e-05	0.137	GCCGGAAGA
GATA1	hTFtarget	NC_037357.1:14356363-14358362	662	673	-	12.5303	3.47e-05	0.137	TTTTATCTGCTC
PPARD/PPARG	hTFtarget	NC_037357.1:14356363-14358362	387	395	-	12.4474	3.47e-05	0.135	TTTCCACTC
SIN3A	hTFtarget	NC_037357.1:14356363-14358362	753	768	+	11.8816	3.47e-05	0.0676	GGGAAGGGAAGAGACA
SMARCA4	hTFtarget	NC_037357.1:14356363-14358362	501	516	+	12.5286	3.47e-05	0.136	CTTCAGCTTCCTTTTG
CBX4	hTFtarget	NC_037357.1:14356363-14358362	751	762	+	12.2895	3.47e-05	0.0867	GGGGGAAGGGAA
ZBTB4	database	NC_037357.1:14356363-14358362	1595	1611	-	6.57143	3.48e-05	0.138	TCAAGAGTGACGGCAGA
NR2F1	database	NC_037357.1:14356363-14358362	907	920	-	11.4082	3.48e-05	0.0876	GGACCCCTGAAACT
SP2	database	NC_037357.1:14356363-14358362	1663	1677	-	11.7759	3.48e-05	0.136	ATTCCGCCTCCATCC
COUP-TF:HNF4	database	NC_037357.1:14356363-14358362	907	920	-	11.4082	3.48e-05	0.0876	GGACCCCTGAAACT
WT1	database	NC_037357.1:14356363-14358362	1929	1937	+	11.3673	3.48e-05	0.138	GCCCCCGGC
BCL3	hTFtarget	NC_037357.1:14356363-14358362	87	103	-	10.5634	3.48e-05	0.0688	CACATACACTTTCCCTC
REST	hTFtarget	NC_037357.1:14356363-14358362	1789	1797	+	12.0132	3.48e-05	0.115	AGTCCTGAA
TFAP2A	hTFtarget	NC_037357.1:14356363-14358362	15	30	-	12.0132	3.48e-05	0.137	AAACAGGGATGTCATG
EHF	hTFtarget	NC_037357.1:14356363-14358362	489	510	-	11.9589	3.48e-05	0.0329	GAAGCTGAAGCAAAAGAGGGGA
ZBTB4	database	NC_037357.1:14356363-14358362	1595	1611	-	6.57143	3.48e-05	0.138	TCAAGAGTGACGGCAGA
ATF2	hTFtarget	NC_037357.1:14356363-14358362	111	119	-	12.3026	3.49e-05	0.139	AACACCACA
SP1	hTFtarget	NC_037357.1:14356363-14358362	1924	1935	+	11.7368	3.49e-05	0.138	GCTACGCCCCCG
SPI1	hTFtarget	NC_037357.1:14356363-14358362	1667	1682	+	11.9714	3.49e-05	0.0682	GGAGGCGGAATTTGGG
SPI1	hTFtarget	NC_037357.1:14356363-14358362	1920	1935	+	11.7143	3.49e-05	0.0967	AGGCGCTACGCCCCCG
E2F6	hTFtarget	NC_037357.1:14356363-14358362	84	95	+	12.4857	3.49e-05	0.137	CAGGAGGGAAAG
TEAD1	database	NC_037357.1:14356363-14358362	1667	1680	-	11.9307	3.49e-05	0.0806	CAAATTCCGCCTCC
KDM1A	hTFtarget	NC_037357.1:14356363-14358362	664	674	-	12.3429	3.5e-05	0.137	GTTTTATCTGC
MYC	hTFtarget	NC_037357.1:14356363-14358362	753	771	+	-9.01316	3.5e-05	0.106	GGGAAGGGAAGAGACACAG
SPI1	hTFtarget	NC_037357.1:14356363-14358362	1666	1681	-	11.3143	3.5e-05	0.0685	CCAAATTCCGCCTCCA
TERF2	database	NC_037357.1:14356363-14358362	629	637	+	13.449	3.5e-05	0.139	CAACCCTAC
ZNF219	database	NC_037357.1:14356363-14358362	1928	1939	+	9.73171	3.51e-05	0.0694	CGCCCCCGGCGC
RELA	hTFtarget	NC_037357.1:14356363-14358362	1956	1971	-	8.78571	3.51e-05	0.0695	CGGAGCTTGCGCCACG
TEAD1	database	NC_037357.1:14356363-14358362	1667	1680	+	11.9239	3.52e-05	0.0822	GGAGGCGGAATTTG
NR3C1	hTFtarget	NC_037357.1:14356363-14358362	799	814	-	11.8939	3.52e-05	0.14	AGAACAGAATCTGCCC
CASP8AP2	hTFtarget	NC_037357.1:14356363-14358362	1956	1971	+	10.6447	3.52e-05	0.0989	CGTGGCGCAAGCTCCG
CREB1	hTFtarget	NC_037357.1:14356363-14358362	1652	1676	-	11.3108	3.52e-05	0.0216	TTCCGCCTCCATCCTTCACTCCCAA
ZBTB17	hTFtarget	NC_037357.1:14356363-14358362	200	215	-	11.2632	3.53e-05	0.14	AGGTTCAGTGGGTAAT
ZBTB33	hTFtarget	NC_037357.1:14356363-14358362	1253	1268	+	11.7403	3.53e-05	0.139	GTACCTTTCAAACCAT
ZKSCAN1	hTFtarget	NC_037357.1:14356363-14358362	230	251	+	11.5549	3.53e-05	0.0685	CATTCAATGGGTGCTAAATGAA
AR	hTFtarget	NC_037357.1:14356363-14358362	800	815	-	12.0909	3.53e-05	0.069	CAGAACAGAATCTGCC
ERG	hTFtarget	NC_037357.1:14356363-14358362	743	767	-	-20.5132	3.53e-05	0.0218	GTCTCTTCCCTTCCCCCACTCCAAC
SMAD1	hTFtarget	NC_037357.1:14356363-14358362	655	673	+	12.1667	3.54e-05	0.14	TTTCTAGGAGCAGATAAAA
SUZ12	hTFtarget	NC_037357.1:14356363-14358362	96	107	-	11.4868	3.54e-05	0.14	CATCCACATACA
TCF7L2	hTFtarget	NC_037357.1:14356363-14358362	510	521	+	12.2388	3.54e-05	0.0682	CCTTTTGAACTC
EP300	hTFtarget	NC_037357.1:14356363-14358362	393	408	+	11.6	3.54e-05	0.0452	AAAGGGGATGAGAATC
SPI1	hTFtarget	NC_037357.1:14356363-14358362	1666	1681	+	11.4868	3.55e-05	0.14	TGGAGGCGGAATTTGG
ELF1	hTFtarget	NC_037357.1:14356363-14358362	1947	1958	-	12.0909	3.55e-05	0.14	ACGCCGGAAGAG
GATA3	hTFtarget	NC_037357.1:14356363-14358362	665	673	+	11.5	3.56e-05	0.141	CAGATAAAA
E2F8	hTFtarget	NC_037357.1:14356363-14358362	1948	1956	-	12.5789	3.56e-05	0.141	GCCGGAAGA
NR2E3	database	NC_037357.1:14356363-14358362	508	521	-	11.71	3.57e-05	0.137	GAGTTCAAAAGGAA
HNF1A	database	NC_037357.1:14356363-14358362	1267	1280	-	11.7374	3.57e-05	0.0664	AGTTAAATATTAAT
STAT1	database	NC_037357.1:14356363-14358362	162	171	-	12.1084	3.57e-05	0.108	TTCAAGGAAA
HNF1A	database	NC_037357.1:14356363-14358362	1267	1280	-	11.7374	3.57e-05	0.0664	AGTTAAATATTAAT
HAND2	hTFtarget	NC_037357.1:14356363-14358362	1238	1253	-	12.2273	3.57e-05	0.141	CTCTGTCTACCGTCTG
STAT4	database	NC_037357.1:14356363-14358362	372	379	+	9.28571	3.58e-05	0.141	GATTTCCA
FOXG1	hTFtarget	NC_037357.1:14356363-14358362	1917	1941	+	10.4935	3.58e-05	0.0834	GTCAGGCGCTACGCCCCCGGCGCGC
NRF1	hTFtarget	NC_037357.1:14356363-14358362	1627	1637	+	10.7	3.58e-05	0.0712	TGGGGGTGCGC
RELA	hTFtarget	NC_037357.1:14356363-14358362	1289	1300	+	12.4079	3.58e-05	0.138	CCTCAGTTTCTT
STAT1	hTFtarget	NC_037357.1:14356363-14358362	1680	1695	-	11.9872	3.58e-05	0.0458	CGTAGCCTTCGCTCCC
STAT5A	hTFtarget	NC_037357.1:14356363-14358362	1000	1011	-	10.6974	3.58e-05	0.0472	CACATGTTCACA
TAL1	hTFtarget	NC_037357.1:14356363-14358362	656	673	+	12.3429	3.58e-05	0.0772	TTCTAGGAGCAGATAAAA
TCF12	hTFtarget	NC_037357.1:14356363-14358362	1282	1290	-	12.4737	3.58e-05	0.139	GGTTCAAAG
AR	hTFtarget	NC_037357.1:14356363-14358362	1733	1743	+	12.0278	3.58e-05	0.138	TTCAGCAAACA
NR2E3	database	NC_037357.1:14356363-14358362	508	521	+	11.71	3.58e-05	0.137	TTCCTTTTGAACTC
SRF	database	NC_037357.1:14356363-14358362	971	985	+	11.1009	3.59e-05	0.0775	ACCATGCATGGTCTC
SOX17	hTFtarget	NC_037357.1:14356363-14358362	1239	1253	-	12.3	3.59e-05	0.125	CTCTGTCTACCGTCT
NR2F2	database	NC_037357.1:14356363-14358362	514	523	-	12.1341	3.6e-05	0.141	CAGAGTTCAA
AR	hTFtarget	NC_037357.1:14356363-14358362	1735	1743	+	12.0139	3.6e-05	0.141	CAGCAAACA
NFYA	hTFtarget	NC_037357.1:14356363-14358362	1924	1935	-	11.6184	3.6e-05	0.128	CGGGGGCGTAGC
RB1	hTFtarget	NC_037357.1:14356363-14358362	1979	1993	-	12.0909	3.6e-05	0.143	GCCTCGCGCCCATTG
IRF3	hTFtarget	NC_037357.1:14356363-14358362	1830	1851	-	11.6316	3.61e-05	0.142	TGGTCCATTTGTACGTTCCTCC
MYC	hTFtarget	NC_037357.1:14356363-14358362	746	767	+	11.0658	3.61e-05	0.141	GGAGTGGGGGAAGGGAAGAGAC
SPI1	hTFtarget	NC_037357.1:14356363-14358362	1920	1935	-	11.6571	3.61e-05	0.0883	CGGGGGCGTAGCGCCT
ETS1	hTFtarget	NC_037357.1:14356363-14358362	80	95	-	11.8961	3.62e-05	0.0476	CTTTCCCTCCTGACTT
SPI1	hTFtarget	NC_037357.1:14356363-14358362	1924	1935	-	11.9342	3.63e-05	0.14	CGGGGGCGTAGC
SPI1	hTFtarget	NC_037357.1:14356363-14358362	1666	1681	-	11.4868	3.63e-05	0.143	CCAAATTCCGCCTCCA
SPI1	hTFtarget	NC_037357.1:14356363-14358362	1666	1681	+	10.6316	3.63e-05	0.0856	TGGAGGCGGAATTTGG
HOXA9	hTFtarget	NC_037357.1:14356363-14358362	1447	1455	+	12.4342	3.64e-05	0.0719	CCCTTGGGA
NR3C1	hTFtarget	NC_037357.1:14356363-14358362	15	30	-	11.9868	3.64e-05	0.0865	AAACAGGGATGTCATG
RELA	hTFtarget	NC_037357.1:14356363-14358362	1960	1971	-	11.1974	3.64e-05	0.144	CGGAGCTTGCGC
BTAF1	hTFtarget	NC_037357.1:14356363-14358362	735	759	-	0.565789	3.64e-05	0.0489	CCTTCCCCCACTCCAACCCAGCTAT
TP53	hTFtarget	NC_037357.1:14356363-14358362	94	118	+	10.7564	3.64e-05	0.0711	AGTGTATGTGGATGTAGTGTGGTGT
SPI1	hTFtarget	NC_037357.1:14356363-14358362	1666	1681	-	11.5286	3.65e-05	0.0955	CCAAATTCCGCCTCCA
SPI1	hTFtarget	NC_037357.1:14356363-14358362	391	405	-	12.0263	3.65e-05	0.0708	TCTCATCCCCTTTCC
SPIB	hTFtarget	NC_037357.1:14356363-14358362	805	820	+	12	3.65e-05	0.143	ATTCTGTTCTGCTTCT
EP300	hTFtarget	NC_037357.1:14356363-14358362	1106	1127	-	11.131	3.65e-05	0.0989	GCATACAGGATATATCTGCTTT
JUND	database	NC_037357.1:14356363-14358362	1051	1065	-	12.0638	3.66e-05	0.145	GGTGGTGACATAATA
SPI1	hTFtarget	NC_037357.1:14356363-14358362	1924	1935	+	11.8553	3.66e-05	0.145	GCTACGCCCCCG
SPI1	hTFtarget	NC_037357.1:14356363-14358362	1666	1681	+	11.2632	3.66e-05	0.145	TGGAGGCGGAATTTGG
FLI1	hTFtarget	NC_037357.1:14356363-14358362	746	759	-	-9.90789	3.67e-05	0.0355	CCTTCCCCCACTCC
BRD4	hTFtarget	NC_037357.1:14356363-14358362	1925	1946	-	10.0649	3.67e-05	0.0377	CACTGGCGCGCCGGGGGCGTAG
XBP1	hTFtarget	NC_037357.1:14356363-14358362	708	726	+	11.2763	3.67e-05	0.0727	GCCAATGTGATTCTACCAA
PAX7	database	NC_037357.1:14356363-14358362	1373	1382	-	11.0099	3.67e-05	0.0807	TAATCAATTC
MAFB	database	NC_037357.1:14356363-14358362	874	882	-	11.4444	3.68e-05	0.143	TGATGACGG
ERG	hTFtarget	NC_037357.1:14356363-14358362	655	673	+	12.2714	3.68e-05	0.072	TTTCTAGGAGCAGATAAAA
GABPA	hTFtarget	NC_037357.1:14356363-14358362	1947	1955	+	12.4714	3.68e-05	0.146	CTCTTCCGG
GLYR1	hTFtarget	NC_037357.1:14356363-14358362	490	511	+	4.03947	3.68e-05	0.0482	CCCCTCTTTTGCTTCAGCTTCC
NKX2-1	hTFtarget	NC_037357.1:14356363-14358362	744	752	-	11.6714	3.68e-05	0.143	CCACTCCAA
TP53	hTFtarget	NC_037357.1:14356363-14358362	387	395	-	12.4868	3.68e-05	0.146	TTTCCACTC
CREB1	hTFtarget	NC_037357.1:14356363-14358362	1053	1061	-	12.5526	3.68e-05	0.147	GTGACATAA
MAFB	database	NC_037357.1:14356363-14358362	874	882	-	11.4343	3.68e-05	0.144	TGATGACGG
AR	hTFtarget	NC_037357.1:14356363-14358362	833	848	+	11.9394	3.69e-05	0.0713	GGGTACATGGTGAACC
SPI1	hTFtarget	NC_037357.1:14356363-14358362	1923	1934	-	11.8158	3.7e-05	0.0861	GGGGGCGTAGCG
CEBPB	hTFtarget	NC_037357.1:14356363-14358362	1954	1967	+	12.5909	3.7e-05	0.146	GGCGTGGCGCAAGC
TCF7L2	hTFtarget	NC_037357.1:14356363-14358362	1734	1745	-	12.1169	3.71e-05	0.145	AATGTTTGCTGA
MED1	hTFtarget	NC_037357.1:14356363-14358362	804	819	+	11.8961	3.72e-05	0.0705	GATTCTGTTCTGCTTC
BRD4	hTFtarget	NC_037357.1:14356363-14358362	1664	1675	-	11.8289	3.72e-05	0.0729	TCCGCCTCCATC
TBP	hTFtarget	NC_037357.1:14356363-14358362	1923	1934	+	10.7105	3.72e-05	0.148	CGCTACGCCCCC
ELF1	hTFtarget	NC_037357.1:14356363-14358362	1948	1959	-	12.3571	3.72e-05	0.147	CACGCCGGAAGA
POU3F3	database	NC_037357.1:14356363-14358362	1267	1278	+	10.8212	3.72e-05	0.0357	ATTAATATTTAA
POU3F3	database	NC_037357.1:14356363-14358362	1267	1278	-	10.8212	3.72e-05	0.0357	TTAAATATTAAT
FLI1	hTFtarget	NC_037357.1:14356363-14358362	752	767	-	12.2121	3.73e-05	0.089	GTCTCTTCCCTTCCCC
GATA3	hTFtarget	NC_037357.1:14356363-14358362	56	67	-	11.7424	3.73e-05	0.0734	GAATGTTATCAC
GATA3	hTFtarget	NC_037357.1:14356363-14358362	665	676	-	11.7424	3.73e-05	0.0734	GGGTTTTATCTG
SPI1	hTFtarget	NC_037357.1:14356363-14358362	1666	1681	-	11.4737	3.73e-05	0.108	CCAAATTCCGCCTCCA
CEBPA	hTFtarget	NC_037357.1:14356363-14358362	504	515	-	12.1515	3.73e-05	0.146	AAAAGGAAGCTG
IRF1	hTFtarget	NC_037357.1:14356363-14358362	799	820	-	10.3143	3.74e-05	0.107	AGAAGCAGAACAGAATCTGCCC
MYOD1	hTFtarget	NC_037357.1:14356363-14358362	686	694	+	12.7368	3.74e-05	0.0839	CTGTCACTG
STAT1	hTFtarget	NC_037357.1:14356363-14358362	776	793	-	11.4225	3.75e-05	0.144	TGACAGTTTCTCTTCATT
TEAD4	hTFtarget	NC_037357.1:14356363-14358362	1734	1743	+	12.4545	3.75e-05	0.145	TCAGCAAACA
E2F6	hTFtarget	NC_037357.1:14356363-14358362	84	94	+	12.3429	3.75e-05	0.149	CAGGAGGGAAA
BRD4	hTFtarget	NC_037357.1:14356363-14358362	1081	1102	+	11.3625	3.76e-05	0.0784	TGATTATTTCTGGAGTGAAATC
SPI1	hTFtarget	NC_037357.1:14356363-14358362	1667	1678	-	11.8714	3.76e-05	0.0741	AATTCCGCCTCC
IRF1	hTFtarget	NC_037357.1:14356363-14358362	758	773	-	11.9286	3.77e-05	0.0479	TTCTGTGTCTCTTCCC
IRF3	hTFtarget	NC_037357.1:14356363-14358362	389	413	+	9.16667	3.77e-05	0.0198	GTGGAAAGGGGATGAGAATCCAGAG
NR2C2	hTFtarget	NC_037357.1:14356363-14358362	1945	1957	+	11.5571	3.77e-05	0.15	TGCTCTTCCGGCG
BTAF1	hTFtarget	NC_037357.1:14356363-14358362	1920	1944	+	0.447368	3.77e-05	0.0489	AGGCGCTACGCCCCCGGCGCGCCAG
SPI1	hTFtarget	NC_037357.1:14356363-14358362	391	408	-	9.68182	3.77e-05	0.0815	GATTCTCATCCCCTTTCC
ETV1	hTFtarget	NC_037357.1:14356363-14358362	692	702	+	12.1039	3.78e-05	0.147	CTGTTTAGTTT
EWSR1	hTFtarget	NC_037357.1:14356363-14358362	751	762	-	10.0143	3.78e-05	0.148	TTCCCTTCCCCC
CDK8	hTFtarget	NC_037357.1:14356363-14358362	1930	1954	+	11.039	3.78e-05	0.113	CCCCCGGCGCGCCAGTGCTCTTCCG
MAZ	database	NC_037357.1:14356363-14358362	1652	1665	+	11.7416	3.79e-05	0.0734	TTGGGAGTGAAGGA
AR	hTFtarget	NC_037357.1:14356363-14358362	1243	1258	+	11.8939	3.79e-05	0.0687	GGTAGACAGAGTACCT
AP2	database	NC_037357.1:14356363-14358362	1970	1985	+	12.0612	3.8e-05	0.151	CGCGGCAAGCAATGGG
BRD4	hTFtarget	NC_037357.1:14356363-14358362	748	769	+	11.6026	3.8e-05	0.0288	AGTGGGGGAAGGGAAGAGACAC
SPI1	hTFtarget	NC_037357.1:14356363-14358362	1924	1935	+	11.7763	3.8e-05	0.149	GCTACGCCCCCG
TAF1	hTFtarget	NC_037357.1:14356363-14358362	1948	1956	-	12.1579	3.8e-05	0.151	GCCGGAAGA
NFATC4	database	NC_037357.1:14356363-14358362	47	56	+	12.0306	3.81e-05	0.149	AGGAAAATGG
SPI1	hTFtarget	NC_037357.1:14356363-14358362	1626	1637	+	10.8421	3.81e-05	0.151	TTGGGGGTGCGC
NFATC4	database	NC_037357.1:14356363-14358362	47	56	-	12.051	3.81e-05	0.149	CCATTTTCCT
BRD3	hTFtarget	NC_037357.1:14356363-14358362	1630	1645	-	11.5455	3.82e-05	0.152	ACTCACACGCGCACCC
GATA1	database	NC_037357.1:14356363-14358362	663	675	+	11.7753	3.83e-05	0.151	AGCAGATAAAACC
GATA3	hTFtarget	NC_037357.1:14356363-14358362	56	67	-	11.697	3.83e-05	0.124	GAATGTTATCAC
EWSR1	hTFtarget	NC_037357.1:14356363-14358362	79	98	+	6.48387	3.83e-05	0.0491	GAAGTCAGGAGGGAAAGTGT
BRD4	hTFtarget	NC_037357.1:14356363-14358362	1953	1974	+	9.97403	3.83e-05	0.0377	CGGCGTGGCGCAAGCTCCGCGG
BRD4	hTFtarget	NC_037357.1:14356363-14358362	507	515	-	12.3158	3.83e-05	0.148	AAAAGGAAG
SMAD1	hTFtarget	NC_037357.1:14356363-14358362	953	961	-	12.9	3.83e-05	0.151	AAATTCCAG
SMAD1	hTFtarget	NC_037357.1:14356363-14358362	953	961	-	12.5571	3.83e-05	0.15	AAATTCCAG
YY1	hTFtarget	NC_037357.1:14356363-14358362	1925	1940	+	10.0132	3.83e-05	0.0634	CTACGCCCCCGGCGCG
ZNF274	hTFtarget	NC_037357.1:14356363-14358362	1088	1101	+	8.91429	3.83e-05	0.0748	TTCTGGAGTGAAAT
CEBPB	hTFtarget	NC_037357.1:14356363-14358362	1954	1969	+	12.2424	3.83e-05	0.152	GGCGTGGCGCAAGCTC
IRF5	database	NC_037357.1:14356363-14358362	759	778	+	-1.34694	3.83e-05	0.0733	GGAAGAGACACAGAATGAAT
TFAP2A	database	NC_037357.1:14356363-14358362	1929	1937	-	12.1207	3.84e-05	0.153	GCCGGGGGC
GATA6	database	NC_037357.1:14356363-14358362	52	68	+	12.2439	3.84e-05	0.145	AATGGTGATAACATTCC
TFAP2A	database	NC_037357.1:14356363-14358362	1929	1937	+	12.101	3.84e-05	0.153	GCCCCCGGC
SRY	database	NC_037357.1:14356363-14358362	1424	1432	+	11.1222	3.85e-05	0.151	TTTAACAAT
ETS1	hTFtarget	NC_037357.1:14356363-14358362	200	215	-	10.9	3.85e-05	0.152	AGGTTCAGTGGGTAAT
NOTCH1	hTFtarget	NC_037357.1:14356363-14358362	1970	1990	+	9.40789	3.85e-05	0.061	CGCGGCAAGCAATGGGCGCGA
SPI1	hTFtarget	NC_037357.1:14356363-14358362	1924	1935	+	11.8289	3.85e-05	0.153	GCTACGCCCCCG
CDK9	hTFtarget	NC_037357.1:14356363-14358362	1947	1955	+	12.4857	3.85e-05	0.153	CTCTTCCGG
CREBBP	hTFtarget	NC_037357.1:14356363-14358362	747	767	+	-10.8	3.85e-05	0.0386	GAGTGGGGGAAGGGAAGAGAC
AR	hTFtarget	NC_037357.1:14356363-14358362	833	848	+	11.6061	3.86e-05	0.0896	GGGTACATGGTGAACC
GTF2I	hTFtarget	NC_037357.1:14356363-14358362	1655	1674	+	10.2763	3.86e-05	0.0756	GGAGTGAAGGATGGAGGCGG
PBX1	hTFtarget	NC_037357.1:14356363-14358362	1446	1454	-	12.2895	3.86e-05	0.0769	CCCAAGGGA
SRC	hTFtarget	NC_037357.1:14356363-14358362	1917	1938	-	10.1711	3.86e-05	0.0756	CGCCGGGGGCGTAGCGCCTGAC
TP53	hTFtarget	NC_037357.1:14356363-14358362	757	772	+	11.5588	3.86e-05	0.0745	AGGGAAGAGACACAGA
THRB	database	NC_037357.1:14356363-14358362	916	932	-	11.6556	3.87e-05	0.153	AGCCCTAGCTCAGGACC
AR	hTFtarget	NC_037357.1:14356363-14358362	834	849	-	11.8939	3.87e-05	0.075	TGGTTCACCATGTACC
GATA3	hTFtarget	NC_037357.1:14356363-14358362	504	515	-	12.2857	3.87e-05	0.153	AAAAGGAAGCTG
CBX3	hTFtarget	NC_037357.1:14356363-14358362	1364	1379	+	11.4487	3.87e-05	0.0766	AATGCATATGAATTGA
NPAS2	database	NC_037357.1:14356363-14358362	1634	1642	-	12.102	3.87e-05	0.154	CACACGCGC
LEF1	database	NC_037357.1:14356363-14358362	1280	1289	-	11.9091	3.89e-05	0.06	GTTCAAAGGA
AR	hTFtarget	NC_037357.1:14356363-14358362	834	848	-	11.6316	3.89e-05	0.077	GGTTCACCATGTACC
RXRA	hTFtarget	NC_037357.1:14356363-14358362	265	276	+	5.36842	3.89e-05	0.154	GAAAGGAGTAGA
ELK1	hTFtarget	NC_037357.1:14356363-14358362	1028	1039	+	10.5921	3.89e-05	0.124	CTCAATATGGTT
EOMES	hTFtarget	NC_037357.1:14356363-14358362	1135	1146	-	12.0658	3.89e-05	0.0765	GAGCTGATAATA
NFE2L1	database	NC_037357.1:14356363-14358362	790	802	+	11.1348	3.9e-05	0.155	GTCATTTATGGGC
ESR1	hTFtarget	NC_037357.1:14356363-14358362	756	780	+	10.7164	3.9e-05	0.0245	AAGGGAAGAGACACAGAATGAATGA
HSF1	hTFtarget	NC_037357.1:14356363-14358362	1985	2000	+	11.3947	3.9e-05	0.0612	GCGCGAGGCGCCGGGA
BMI1	hTFtarget	NC_037357.1:14356363-14358362	1953	1974	+	11.5844	3.9e-05	0.0651	CGGCGTGGCGCAAGCTCCGCGG
HNF1A	database	NC_037357.1:14356363-14358362	1266	1280	-	11.7662	3.91e-05	0.109	AGTTAAATATTAATG
HOXB1	database	NC_037357.1:14356363-14358362	1659	1668	+	9.08163	3.91e-05	0.155	TGAAGGATGG
SPIB	database	NC_037357.1:14356363-14358362	1076	1087	-	12.1341	3.91e-05	0.154	ATAATCAGGAAC
SPIB	database	NC_037357.1:14356363-14358362	1076	1087	-	12.0918	3.91e-05	0.153	ATAATCAGGAAC
ISGF3	database	NC_037357.1:14356363-14358362	776	790	-	8.44898	3.92e-05	0.0768	CAGTTTCTCTTCATT
HOXD8	database	NC_037357.1:14356363-14358362	1262	1278	-	11.44	3.92e-05	0.0712	TTAAATATTAATGGTTT
AR	hTFtarget	NC_037357.1:14356363-14358362	800	815	-	11.9545	3.92e-05	0.0938	CAGAACAGAATCTGCC
RELA	hTFtarget	NC_037357.1:14356363-14358362	1958	1969	+	8.91429	3.92e-05	0.102	TGGCGCAAGCTC
C17orf96	hTFtarget	NC_037357.1:14356363-14358362	71	95	+	11.5696	3.92e-05	0.0305	GAAACAGAGAAGTCAGGAGGGAAAG
FLI1	hTFtarget	NC_037357.1:14356363-14358362	484	499	+	-18.4697	3.93e-05	0.0375	CTTACTCCCCTCTTTT
SPI1	hTFtarget	NC_037357.1:14356363-14358362	1924	1935	-	12.0571	3.94e-05	0.143	CGGGGGCGTAGC
ERG	hTFtarget	NC_037357.1:14356363-14358362	1656	1667	-	11.8816	3.94e-05	0.0379	CATCCTTCACTC
HNF1A	database	NC_037357.1:14356363-14358362	1266	1280	+	11.74	3.94e-05	0.111	CATTAATATTTAACT
TAL1	hTFtarget	NC_037357.1:14356363-14358362	47	64	+	12.2286	3.95e-05	0.0772	AGGAAAATGGTGATAACA
CDK9	hTFtarget	NC_037357.1:14356363-14358362	1947	1955	+	12.4857	3.95e-05	0.157	CTCTTCCGG
AR	hTFtarget	NC_037357.1:14356363-14358362	1735	1743	+	12.0417	3.96e-05	0.154	CAGCAAACA
SMARCA4	hTFtarget	NC_037357.1:14356363-14358362	665	673	+	12.5789	3.96e-05	0.157	CAGATAAAA
TCF7L2	hTFtarget	NC_037357.1:14356363-14358362	1331	1342	-	11.9545	3.96e-05	0.0522	CCCTGTGATGTC
STAT2	database	NC_037357.1:14356363-14358362	758	772	+	11.7638	3.96e-05	0.154	GGGAAGAGACACAGA
STAT2	database	NC_037357.1:14356363-14358362	758	772	+	11.7638	3.97e-05	0.154	GGGAAGAGACACAGA
PDX1	database	NC_037357.1:14356363-14358362	1263	1274	+	11.7792	3.97e-05	0.0774	AACCATTAATAT
NR3C1	hTFtarget	NC_037357.1:14356363-14358362	834	848	+	11.4242	3.97e-05	0.158	GGTACATGGTGAACC
KLF8	database	NC_037357.1:14356363-14358362	1928	1936	-	12.5041	3.98e-05	0.132	CCGGGGGCG
STAT1	database	NC_037357.1:14356363-14358362	64	74	-	11.6727	3.98e-05	0.13	TTTCAGGGAAT
GTF2I	hTFtarget	NC_037357.1:14356363-14358362	1820	1839	-	6.31579	3.98e-05	0.0787	ACGTTCCTCCGAAAAATTGG
SPI1	hTFtarget	NC_037357.1:14356363-14358362	1919	1934	+	11.5857	3.98e-05	0.0787	CAGGCGCTACGCCCCC
TAL1	hTFtarget	NC_037357.1:14356363-14358362	655	673	+	12.1286	3.98e-05	0.0776	TTTCTAGGAGCAGATAAAA
ZBTB33	hTFtarget	NC_037357.1:14356363-14358362	745	760	-	10.3158	3.98e-05	0.064	CCCTTCCCCCACTCCA
KLF8	database	NC_037357.1:14356363-14358362	1928	1936	-	12.5816	3.98e-05	0.132	CCGGGGGCG
BCL6	hTFtarget	NC_037357.1:14356363-14358362	653	664	+	11.7606	3.99e-05	0.157	GGTTTCTAGGAG
SUZ12	hTFtarget	NC_037357.1:14356363-14358362	1956	1971	+	9.32857	3.99e-05	0.158	CGTGGCGCAAGCTCCG
CREBBP	hTFtarget	NC_037357.1:14356363-14358362	922	942	+	-10.9857	4e-05	0.0386	GAGCTAGGGCTACACAGAGAA
POLR2A	hTFtarget	NC_037357.1:14356363-14358362	1665	1676	-	10.1579	4.01e-05	0.159	TTCCGCCTCCAT
SPI1	hTFtarget	NC_037357.1:14356363-14358362	1936	1947	+	10.8553	4.01e-05	0.102	GCGCGCCAGTGC
ZNF143	hTFtarget	NC_037357.1:14356363-14358362	940	948	+	12.3289	4.01e-05	0.16	GAACTACAC
ZNF274	hTFtarget	NC_037357.1:14356363-14358362	881	892	-	11.3429	4.01e-05	0.159	AGTACTTTGATG
IRF3	hTFtarget	NC_037357.1:14356363-14358362	1666	1677	+	11.6579	4.02e-05	0.158	TGGAGGCGGAAT
C17orf96	hTFtarget	NC_037357.1:14356363-14358362	381	405	+	11.5316	4.02e-05	0.0305	AAGTCTGAGTGGAAAGGGGATGAGA
SPI1	hTFtarget	NC_037357.1:14356363-14358362	751	766	-	10.8939	4.02e-05	0.157	TCTCTTCCCTTCCCCC
PDX1	database	NC_037357.1:14356363-14358362	422	436	-	11.8911	4.03e-05	0.155	TCAGACATTAAATTC
BRD4	hTFtarget	NC_037357.1:14356363-14358362	258	279	+	11.2875	4.03e-05	0.0784	TGGTGAAGAAAGGAGTAGAAGC
THAP1	database	NC_037357.1:14356363-14358362	796	804	-	10.5526	4.04e-05	0.159	CTGCCCATA
RCOR1	hTFtarget	NC_037357.1:14356363-14358362	1820	1835	-	7.55714	4.06e-05	0.0796	TCCTCCGAAAAATTGG
CDK9	hTFtarget	NC_037357.1:14356363-14358362	1953	1976	+	9.69737	4.06e-05	0.16	CGGCGTGGCGCAAGCTCCGCGGCA
FOXJ2	database	NC_037357.1:14356363-14358362	1731	1748	+	12.3696	4.07e-05	0.16	AATTCAGCAAACATTTGT
KLF4	hTFtarget	NC_037357.1:14356363-14358362	1924	1935	-	11.9857	4.07e-05	0.161	CGGGGGCGTAGC
NRF1	hTFtarget	NC_037357.1:14356363-14358362	1631	1644	+	10.4868	4.07e-05	0.0539	GGTGCGCGTGTGAG
RELA	hTFtarget	NC_037357.1:14356363-14358362	1627	1638	+	10.3	4.07e-05	0.081	TGGGGGTGCGCG
SPI1	hTFtarget	NC_037357.1:14356363-14358362	1666	1681	-	11.6429	4.07e-05	0.0805	CCAAATTCCGCCTCCA
TP53	hTFtarget	NC_037357.1:14356363-14358362	1001	1012	+	11.8026	4.07e-05	0.162	GTGAACATGTGC
CTCF	hTFtarget	NC_037357.1:14356363-14358362	1982	1998	+	9.95455	4.07e-05	0.161	TGGGCGCGAGGCGCCGG
MYC	hTFtarget	NC_037357.1:14356363-14358362	1948	1956	+	12.6447	4.08e-05	0.161	TCTTCCGGC
MYC	hTFtarget	NC_037357.1:14356363-14358362	1948	1956	+	12.6447	4.08e-05	0.161	TCTTCCGGC
TRIM28	hTFtarget	NC_037357.1:14356363-14358362	153	168	-	11.5132	4.08e-05	0.0796	AAGGAAAGGCTCAACA
ZNF384	hTFtarget	NC_037357.1:14356363-14358362	1552	1573	-	4.875	4.08e-05	0.126	ACGGTGAATTTTTTTTCTCTCT
TEAD1	database	NC_037357.1:14356363-14358362	949	962	-	11.7426	4.08e-05	0.0806	AAAATTCCAGAGCT
EZH2	hTFtarget	NC_037357.1:14356363-14358362	1552	1573	+	10.8837	4.09e-05	0.154	AGAGAGAAAAAAAATTCACCGT
AR	hTFtarget	NC_037357.1:14356363-14358362	834	849	-	11.8714	4.09e-05	0.162	TGGTTCACCATGTACC
GTF2I	hTFtarget	NC_037357.1:14356363-14358362	1291	1312	+	4.77632	4.09e-05	0.161	TCAGTTTCTTCTATAAAATGGA
TRIM28	hTFtarget	NC_037357.1:14356363-14358362	149	166	+	9.64474	4.09e-05	0.161	ATATTGTTGAGCCTTTCC
EP300	hTFtarget	NC_037357.1:14356363-14358362	1938	1962	+	8.57895	4.09e-05	0.0648	GCGCCAGTGCTCTTCCGGCGTGGCG
MYB	hTFtarget	NC_037357.1:14356363-14358362	506	514	-	12.75	4.1e-05	0.162	AAAGGAAGC
THAP1	hTFtarget	NC_037357.1:14356363-14358362	1946	1960	+	9.31579	4.1e-05	0.162	GCTCTTCCGGCGTGG
EWSR1	hTFtarget	NC_037357.1:14356363-14358362	748	763	+	-6.11429	4.11e-05	0.0521	AGTGGGGGAAGGGAAG
MED1	hTFtarget	NC_037357.1:14356363-14358362	1447	1455	+	12.2368	4.11e-05	0.0819	CCCTTGGGA
BRD3	hTFtarget	NC_037357.1:14356363-14358362	94	109	-	11.6494	4.11e-05	0.0871	TACATCCACATACACT
HDAC2	hTFtarget	NC_037357.1:14356363-14358362	1928	1949	+	9.28947	4.12e-05	0.0805	CGCCCCCGGCGCGCCAGTGCTC
IKZF1	hTFtarget	NC_037357.1:14356363-14358362	269	284	-	11.7895	4.12e-05	0.0497	TCCCAGCTTCTACTCC
TCF4	hTFtarget	NC_037357.1:14356363-14358362	510	521	-	11.9859	4.12e-05	0.0804	GAGTTCAAAAGG
FOS	hTFtarget	NC_037357.1:14356363-14358362	1666	1677	+	11.6316	4.13e-05	0.141	TGGAGGCGGAAT
MED1	hTFtarget	NC_037357.1:14356363-14358362	773	788	+	11.7143	4.13e-05	0.0789	ATGAATGAAGAGAAAC
REST	hTFtarget	NC_037357.1:14356363-14358362	1929	1953	-	10.4026	4.13e-05	0.0404	GGAAGAGCACTGGCGCGCCGGGGGC
SPI1	hTFtarget	NC_037357.1:14356363-14358362	391	408	+	9.51515	4.13e-05	0.0748	GGAAAGGGGATGAGAATC
TEF	database	NC_037357.1:14356363-14358362	1220	1231	+	12.1969	4.14e-05	0.159	ATGGATTCATAA
AR	hTFtarget	NC_037357.1:14356363-14358362	1735	1743	+	12.0909	4.14e-05	0.162	CAGCAAACA
STAT1	hTFtarget	NC_037357.1:14356363-14358362	972	983	-	9.67105	4.14e-05	0.0568	GACCATGCATGG
STAT1	hTFtarget	NC_037357.1:14356363-14358362	970	981	+	9.67105	4.14e-05	0.0568	GACCATGCATGG
PAX7	database	NC_037357.1:14356363-14358362	1373	1382	+	10.703	4.14e-05	0.0807	GAATTGATTA
SPI1	database	NC_037357.1:14356363-14358362	747	763	+	11.0364	4.15e-05	0.119	GAGTGGGGGAAGGGAAG
TEAD1	database	NC_037357.1:14356363-14358362	949	962	+	11.7283	4.15e-05	0.0822	AGCTCTGGAATTTT
HIF1A	hTFtarget	NC_037357.1:14356363-14358362	747	764	-	3.14474	4.15e-05	0.0802	TCTTCCCTTCCCCCACTC
LYL1	hTFtarget	NC_037357.1:14356363-14358362	501	514	+	11.5286	4.15e-05	0.164	CTTCAGCTTCCTTT
BCL6	hTFtarget	NC_037357.1:14356363-14358362	653	664	-	11.6761	4.15e-05	0.165	CTCCTAGAAACC
PPARG	hTFtarget	NC_037357.1:14356363-14358362	1811	1829	-	11.5634	4.15e-05	0.0797	GAAAAATTGGGCAAGGGTG
SPI1	hTFtarget	NC_037357.1:14356363-14358362	1958	1969	-	11.2895	4.15e-05	0.055	GAGCTTGCGCCA
ELF1	hTFtarget	NC_037357.1:14356363-14358362	1667	1678	-	10.3816	4.15e-05	0.0824	AATTCCGCCTCC
SREBF2	database	NC_037357.1:14356363-14358362	123	135	-	11.3818	4.15e-05	0.164	CATCTCTCCACTT
SREBF2	database	NC_037357.1:14356363-14358362	123	135	+	11.4	4.16e-05	0.165	AAGTGGAGAGATG
NFIC	hTFtarget	NC_037357.1:14356363-14358362	1711	1726	+	10.75	4.16e-05	0.165	TCAGGCACTTTTTCAG
NRF1	hTFtarget	NC_037357.1:14356363-14358362	1626	1637	+	10.0857	4.16e-05	0.0826	TTGGGGGTGCGC
SPI1	hTFtarget	NC_037357.1:14356363-14358362	1056	1070	-	11.4605	4.16e-05	0.102	GAAGAGGTGGTGACA
KAT5	hTFtarget	NC_037357.1:14356363-14358362	1927	1942	-	10.7368	4.17e-05	0.165	GGCGCGCCGGGGGCGT
SMAD4	hTFtarget	NC_037357.1:14356363-14358362	1254	1269	-	11.7013	4.17e-05	0.165	AATGGTTTGAAAGGTA
SPI1	hTFtarget	NC_037357.1:14356363-14358362	1661	1682	+	9.67105	4.17e-05	0.0826	AAGGATGGAGGCGGAATTTGGG
TP53	hTFtarget	NC_037357.1:14356363-14358362	1001	1012	-	11.6316	4.17e-05	0.166	GCACATGTTCAC
ETS1	hTFtarget	NC_037357.1:14356363-14358362	1946	1957	-	12.1212	4.18e-05	0.166	CGCCGGAAGAGC
EZH1	hTFtarget	NC_037357.1:14356363-14358362	1925	1936	+	9.78947	4.18e-05	0.0847	CTACGCCCCCGG
SPI1	hTFtarget	NC_037357.1:14356363-14358362	1947	1955	+	12.1447	4.18e-05	0.165	CTCTTCCGG
CREB1	hTFtarget	NC_037357.1:14356363-14358362	755	779	-	11.0338	4.18e-05	0.0216	CATTCATTCTGTGTCTCTTCCCTTC
NR3C1	database	NC_037357.1:14356363-14358362	798	815	-	11.381	4.19e-05	0.163	CAGAACAGAATCTGCCCA
GATA2	hTFtarget	NC_037357.1:14356363-14358362	507	515	+	12.0571	4.19e-05	0.166	CTTCCTTTT
GATA2	hTFtarget	NC_037357.1:14356363-14358362	507	515	+	12	4.19e-05	0.166	CTTCCTTTT
AR	hTFtarget	NC_037357.1:14356363-14358362	800	815	-	11.8	4.2e-05	0.0821	CAGAACAGAATCTGCC
IRF3	hTFtarget	NC_037357.1:14356363-14358362	751	775	+	8.88462	4.2e-05	0.0198	GGGGGAAGGGAAGAGACACAGAATG
CDK8	hTFtarget	NC_037357.1:14356363-14358362	509	520	+	11.9481	4.2e-05	0.162	TCCTTTTGAACT
ERG	hTFtarget	NC_037357.1:14356363-14358362	1947	1958	+	11.8636	4.21e-05	0.167	CTCTTCCGGCGT
GTF3C2	hTFtarget	NC_037357.1:14356363-14358362	503	524	-	4.48571	4.21e-05	0.137	TCAGAGTTCAAAAGGAAGCTGA
EWSR1	hTFtarget	NC_037357.1:14356363-14358362	747	765	+	-2.01515	4.21e-05	0.0395	GAGTGGGGGAAGGGAAGAG
PRKDC	hTFtarget	NC_037357.1:14356363-14358362	1054	1069	+	11.1184	4.21e-05	0.0829	TATGTCACCACCTCTT
FLI1	hTFtarget	NC_037357.1:14356363-14358362	84	95	-	-5.25714	4.22e-05	0.164	CTTTCCCTCCTG
SPI1	hTFtarget	NC_037357.1:14356363-14358362	804	821	+	9.40909	4.22e-05	0.0815	GATTCTGTTCTGCTTCTT
SUZ12	hTFtarget	NC_037357.1:14356363-14358362	495	519	+	10.5921	4.22e-05	0.163	CTTTTGCTTCAGCTTCCTTTTGAAC
TRIM24	hTFtarget	NC_037357.1:14356363-14358362	1451	1472	+	9.32895	4.22e-05	0.165	TGGGAGACTGTGGAAAAGGGGT
UBN1	hTFtarget	NC_037357.1:14356363-14358362	569	583	-	11.8684	4.22e-05	0.126	CTGAATTCTTCCATC
EP300	hTFtarget	NC_037357.1:14356363-14358362	1719	1732	-	6.91429	4.22e-05	0.0662	TTAAGACTGAAAAA
EP300	hTFtarget	NC_037357.1:14356363-14358362	753	768	-	11.6316	4.22e-05	0.111	TGTCTCTTCCCTTCCC
ZNF263	database	NC_037357.1:14356363-14358362	395	415	+	10.551	4.23e-05	0.0419	AGGGGATGAGAATCCAGAGGA
FOXM1	hTFtarget	NC_037357.1:14356363-14358362	1257	1265	+	12.2208	4.23e-05	0.165	CTTTCAAAC
GTF2I	hTFtarget	NC_037357.1:14356363-14358362	1662	1677	-	11.1447	4.23e-05	0.0827	ATTCCGCCTCCATCCT
REST	hTFtarget	NC_037357.1:14356363-14358362	239	247	+	11.6974	4.23e-05	0.165	GGTGCTAAA
STAT3	hTFtarget	NC_037357.1:14356363-14358362	1663	1674	+	11.9	4.23e-05	0.166	GGATGGAGGCGG
ESR1	hTFtarget	NC_037357.1:14356363-14358362	1734	1744	+	12.1558	4.24e-05	0.167	TCAGCAAACAT
IRF3	hTFtarget	NC_037357.1:14356363-14358362	740	764	+	8.85897	4.24e-05	0.0198	TGGGTTGGAGTGGGGGAAGGGAAGA
LMO2	hTFtarget	NC_037357.1:14356363-14358362	501	515	+	12.0606	4.24e-05	0.167	CTTCAGCTTCCTTTT
MYC	hTFtarget	NC_037357.1:14356363-14358362	1661	1672	+	11.8289	4.24e-05	0.167	AAGGATGGAGGC
SP2	hTFtarget	NC_037357.1:14356363-14358362	1667	1678	+	11.5921	4.24e-05	0.168	GGAGGCGGAATT
ZNF711	hTFtarget	NC_037357.1:14356363-14358362	531	539	+	12.9737	4.24e-05	0.169	AGGCCTAGG
TRIM63	database	NC_037357.1:14356363-14358362	778	792	-	11.8876	4.25e-05	0.151	GACAGTTTCTCTTCA
ETV4	hTFtarget	NC_037357.1:14356363-14358362	1636	1650	-	11.4359	4.25e-05	0.168	CAGTAACTCACACGC
NRF1	hTFtarget	NC_037357.1:14356363-14358362	1934	1947	-	8.71212	4.25e-05	0.0844	GCACTGGCGCGCCG
PML	hTFtarget	NC_037357.1:14356363-14358362	504	515	+	11.9286	4.25e-05	0.167	CAGCTTCCTTTT
SUMO2/SUMO3	hTFtarget	NC_037357.1:14356363-14358362	120	141	+	11.5256	4.25e-05	0.157	CAGAAGTGGAGAGATGAATTTG
CEBPB	hTFtarget	NC_037357.1:14356363-14358362	1814	1824	+	12.1184	4.25e-05	0.168	CCTTGCCCAAT
CTCF	hTFtarget	NC_037357.1:14356363-14358362	1984	1999	-	9.5303	4.25e-05	0.169	CCCGGCGCCTCGCGCC
SPI1	database	NC_037357.1:14356363-14358362	747	763	+	11.0204	4.25e-05	0.111	GAGTGGGGGAAGGGAAG
ZNF384	database	NC_037357.1:14356363-14358362	1854	1862	+	12.0652	4.26e-05	0.166	GAAAAACTC
EZH1	hTFtarget	NC_037357.1:14356363-14358362	1960	1971	-	9.73684	4.26e-05	0.0847	CGGAGCTTGCGC
OTX2	hTFtarget	NC_037357.1:14356363-14358362	1364	1379	-	11.5584	4.26e-05	0.163	TCAATTCATATGCATT
RELA	hTFtarget	NC_037357.1:14356363-14358362	1959	1970	+	9.12121	4.26e-05	0.169	GGCGCAAGCTCC
TRIM28	hTFtarget	NC_037357.1:14356363-14358362	656	667	+	11.6184	4.26e-05	0.142	TTCTAGGAGCAG
AR	hTFtarget	NC_037357.1:14356363-14358362	833	848	+	11.6364	4.26e-05	0.0844	GGGTACATGGTGAACC
EP300	hTFtarget	NC_037357.1:14356363-14358362	754	768	-	11.6538	4.26e-05	0.0823	TGTCTCTTCCCTTCC
SPI1	hTFtarget	NC_037357.1:14356363-14358362	1920	1935	-	10.7	4.27e-05	0.0836	CGGGGGCGTAGCGCCT
ZNF274	hTFtarget	NC_037357.1:14356363-14358362	881	892	-	10.7429	4.27e-05	0.17	AGTACTTTGATG
GTF2I	hTFtarget	NC_037357.1:14356363-14358362	1976	1997	-	8.93421	4.28e-05	0.084	CGGCGCCTCGCGCCCATTGCTT
SMARCA4	hTFtarget	NC_037357.1:14356363-14358362	664	673	+	12.3	4.28e-05	0.168	GCAGATAAAA
SRF	hTFtarget	NC_037357.1:14356363-14358362	1930	1945	+	10.6053	4.28e-05	0.169	CCCCCGGCGCGCCAGT
STAT1	hTFtarget	NC_037357.1:14356363-14358362	1118	1129	-	9.59211	4.28e-05	0.0568	GAGCATACAGGA
VEZF1	hTFtarget	NC_037357.1:14356363-14358362	740	761	-	10.0714	4.28e-05	0.065	TCCCTTCCCCCACTCCAACCCA
HNF1A	database	NC_037357.1:14356363-14358362	1266	1280	-	11.5889	4.29e-05	0.0827	AGTTAAATATTAATG
HSF1	hTFtarget	NC_037357.1:14356363-14358362	366	383	+	10.7895	4.29e-05	0.17	CCTAGAGATTTCCATAAG
IRF5	hTFtarget	NC_037357.1:14356363-14358362	1556	1571	+	3.58442	4.29e-05	0.129	AGAAAAAAAATTCACC
JUND	hTFtarget	NC_037357.1:14356363-14358362	1733	1743	+	12.6364	4.29e-05	0.167	TTCAGCAAACA
MED1	hTFtarget	NC_037357.1:14356363-14358362	1948	1956	-	12.3571	4.29e-05	0.17	GCCGGAAGA
NRF1	hTFtarget	NC_037357.1:14356363-14358362	1936	1947	-	9.43939	4.29e-05	0.17	GCACTGGCGCGC
REST	hTFtarget	NC_037357.1:14356363-14358362	239	247	+	11.9211	4.29e-05	0.11	GGTGCTAAA
YY1	hTFtarget	NC_037357.1:14356363-14358362	1660	1675	+	9.89394	4.29e-05	0.17	GAAGGATGGAGGCGGA
CEBPA	hTFtarget	NC_037357.1:14356363-14358362	47	64	-	12.0758	4.29e-05	0.0848	TGTTATCACCATTTTCCT
AR	hTFtarget	NC_037357.1:14356363-14358362	834	849	+	11.5571	4.3e-05	0.167	GGTACATGGTGAACCA
AR	hTFtarget	NC_037357.1:14356363-14358362	800	815	+	11.6818	4.3e-05	0.0832	GGCAGATTCTGTTCTG
SPI1	hTFtarget	NC_037357.1:14356363-14358362	1960	1971	-	10.7237	4.3e-05	0.171	CGGAGCTTGCGC
AR	hTFtarget	NC_037357.1:14356363-14358362	799	814	+	11.7424	4.31e-05	0.0854	GGGCAGATTCTGTTCT
POU5F1	hTFtarget	NC_037357.1:14356363-14358362	1921	1942	-	10.6579	4.31e-05	0.0421	GGCGCGCCGGGGGCGTAGCGCC
STAT5A	hTFtarget	NC_037357.1:14356363-14358362	1631	1642	-	10.9474	4.31e-05	0.0857	CACACGCGCACC
AR	hTFtarget	NC_037357.1:14356363-14358362	1244	1259	-	11.6667	4.31e-05	0.171	AAGGTACTCTGTCTAC
RELA	hTFtarget	NC_037357.1:14356363-14358362	1934	1947	+	10.5526	4.32e-05	0.0795	CGGCGCGCCAGTGC
RNF2	hTFtarget	NC_037357.1:14356363-14358362	95	110	-	-3.45714	4.32e-05	0.17	CTACATCCACATACAC
SPI1	hTFtarget	NC_037357.1:14356363-14358362	1903	1918	-	11.0789	4.32e-05	0.172	ACCACTAGAGCTAGCA
SREBF1	hTFtarget	NC_037357.1:14356363-14358362	331	346	+	11.7105	4.32e-05	0.172	CTTCCAATTGGTAGGA
GATA1	database	NC_037357.1:14356363-14358362	55	64	+	12.2752	4.33e-05	0.0855	GGTGATAACA
VDR	database	NC_037357.1:14356363-14358362	838	849	+	10.9208	4.33e-05	0.0861	CATGGTGAACCA
FOXP3	hTFtarget	NC_037357.1:14356363-14358362	504	518	+	11.9286	4.33e-05	0.17	CAGCTTCCTTTTGAA
RUNX1	hTFtarget	NC_037357.1:14356363-14358362	504	515	-	11.8571	4.33e-05	0.171	AAAAGGAAGCTG
SIN3A	hTFtarget	NC_037357.1:14356363-14358362	1733	1745	-	12.3056	4.33e-05	0.168	AATGTTTGCTGAA
BTAF1	hTFtarget	NC_037357.1:14356363-14358362	394	405	+	11.4474	4.33e-05	0.145	AAGGGGATGAGA
SPI1	hTFtarget	NC_037357.1:14356363-14358362	1666	1681	-	10.3429	4.33e-05	0.0853	CCAAATTCCGCCTCCA
MYB	hTFtarget	NC_037357.1:14356363-14358362	1923	1947	+	8.69737	4.34e-05	0.0824	CGCTACGCCCCCGGCGCGCCAGTGC
SPI1	hTFtarget	NC_037357.1:14356363-14358362	1667	1678	+	11.5658	4.34e-05	0.0861	GGAGGCGGAATT
SPI1	hTFtarget	NC_037357.1:14356363-14358362	1920	1935	-	10.2105	4.34e-05	0.0856	CGGGGGCGTAGCGCCT
SPI1	hTFtarget	NC_037357.1:14356363-14358362	1903	1918	-	10.7895	4.34e-05	0.172	ACCACTAGAGCTAGCA
CEBPD	hTFtarget	NC_037357.1:14356363-14358362	1956	1967	-	12.4857	4.34e-05	0.17	GCTTGCGCCACG
E2F6	hTFtarget	NC_037357.1:14356363-14358362	83	94	+	12.2429	4.34e-05	0.171	TCAGGAGGGAAA
ZNF232	database	NC_037357.1:14356363-14358362	1007	1025	+	4.56122	4.34e-05	0.171	ATGTGCAAGATGGATTAAA
IRF3	hTFtarget	NC_037357.1:14356363-14358362	1923	1934	-	11.5	4.35e-05	0.0861	GGGGGCGTAGCG
AR	hTFtarget	NC_037357.1:14356363-14358362	800	815	-	11.7273	4.35e-05	0.0849	CAGAACAGAATCTGCC
FOXA1	hTFtarget	NC_037357.1:14356363-14358362	1733	1743	+	11.9167	4.36e-05	0.171	TTCAGCAAACA
RBL2	hTFtarget	NC_037357.1:14356363-14358362	1982	1993	-	11.5526	4.36e-05	0.173	GCCTCGCGCCCA
RUNX1	hTFtarget	NC_037357.1:14356363-14358362	953	964	-	11.1829	4.36e-05	0.114	GTAAAATTCCAG
SP2	hTFtarget	NC_037357.1:14356363-14358362	1666	1677	+	11.1184	4.36e-05	0.171	TGGAGGCGGAAT
STAT5A	hTFtarget	NC_037357.1:14356363-14358362	155	170	+	5.05263	4.36e-05	0.0853	TTGAGCCTTTCCTTGA
TAL1	hTFtarget	NC_037357.1:14356363-14358362	506	514	-	12.4286	4.36e-05	0.173	AAAGGAAGC
YY1	database	NC_037357.1:14356363-14358362	1012	1020	-	11.3939	4.37e-05	0.0951	TCCATCTTG
AR	hTFtarget	NC_037357.1:14356363-14358362	1735	1743	+	12.0278	4.37e-05	0.171	CAGCAAACA
HDAC2	hTFtarget	NC_037357.1:14356363-14358362	1640	1648	+	11.4605	4.37e-05	0.17	GTGAGTTAC
FLI1	hTFtarget	NC_037357.1:14356363-14358362	753	764	+	10.4507	4.38e-05	0.103	GGGAAGGGAAGA
PML	hTFtarget	NC_037357.1:14356363-14358362	753	768	+	11.9571	4.38e-05	0.171	GGGAAGGGAAGAGACA
SNAI2	database	NC_037357.1:14356363-14358362	1766	1772	+	12.9344	4.39e-05	0.175	CCAGGTG
KLF4	database	NC_037357.1:14356363-14358362	1444	1450	+	10.6224	4.39e-05	0.173	CCTCCCT
TWIST1	database	NC_037357.1:14356363-14358362	1766	1772	-	12.5918	4.39e-05	0.175	CACCTGG
ERG	hTFtarget	NC_037357.1:14356363-14358362	1949	1955	-	13.1842	4.39e-05	0.175	CCGGAAG
ETS1	hTFtarget	NC_037357.1:14356363-14358362	1949	1955	-	12.1316	4.39e-05	0.174	CCGGAAG
ETS1	hTFtarget	NC_037357.1:14356363-14358362	1949	1955	-	11.8714	4.39e-05	0.174	CCGGAAG
FLI1	hTFtarget	NC_037357.1:14356363-14358362	1949	1955	-	12.2	4.39e-05	0.174	CCGGAAG
GABPA	hTFtarget	NC_037357.1:14356363-14358362	1949	1955	-	13.0286	4.39e-05	0.175	CCGGAAG
GABPA	hTFtarget	NC_037357.1:14356363-14358362	1948	1955	+	12.1714	4.39e-05	0.174	TCTTCCGG
GABPA	hTFtarget	NC_037357.1:14356363-14358362	1949	1955	-	13.1143	4.39e-05	0.175	CCGGAAG
GABPA	hTFtarget	NC_037357.1:14356363-14358362	1949	1955	-	12.6571	4.39e-05	0.174	CCGGAAG
GATA4	hTFtarget	NC_037357.1:14356363-14358362	665	673	+	11.2121	4.39e-05	0.173	CAGATAAAA
ASCL1	hTFtarget	NC_037357.1:14356363-14358362	1766	1772	-	12.5571	4.39e-05	0.175	CACCTGG
IKZF1	hTFtarget	NC_037357.1:14356363-14358362	753	759	+	11.4714	4.39e-05	0.0864	GGGAAGG
IKZF1	hTFtarget	NC_037357.1:14356363-14358362	295	301	-	11.4714	4.39e-05	0.0864	GGGAAGG
KLF4	hTFtarget	NC_037357.1:14356363-14358362	1631	1646	-	9.94286	4.39e-05	0.0866	AACTCACACGCGCACC
MED1	hTFtarget	NC_037357.1:14356363-14358362	1949	1955	-	12.6316	4.39e-05	0.175	CCGGAAG
MED1	hTFtarget	NC_037357.1:14356363-14358362	1766	1772	-	13.2368	4.39e-05	0.175	CACCTGG
NR2C2	hTFtarget	NC_037357.1:14356363-14358362	1949	1955	-	13.3158	4.39e-05	0.175	CCGGAAG
NR3C1	hTFtarget	NC_037357.1:14356363-14358362	800	813	-	11.5606	4.39e-05	0.134	GAACAGAATCTGCC
BRD4	hTFtarget	NC_037357.1:14356363-14358362	1766	1772	-	12.4211	4.39e-05	0.174	CACCTGG
SRF	hTFtarget	NC_037357.1:14356363-14358362	1949	1955	-	12.2	4.39e-05	0.174	CCGGAAG
TCF12	hTFtarget	NC_037357.1:14356363-14358362	1766	1772	-	12.9429	4.39e-05	0.175	CACCTGG
ELF1	hTFtarget	NC_037357.1:14356363-14358362	1949	1955	-	12.7105	4.39e-05	0.174	CCGGAAG
ELF1	hTFtarget	NC_037357.1:14356363-14358362	1949	1955	-	13.6842	4.39e-05	0.174	CCGGAAG
ELK3	hTFtarget	NC_037357.1:14356363-14358362	1949	1955	-	13.4714	4.39e-05	0.175	CCGGAAG
ELK4	hTFtarget	NC_037357.1:14356363-14358362	1949	1955	-	13.4605	4.39e-05	0.175	CCGGAAG
ELK4	hTFtarget	NC_037357.1:14356363-14358362	1949	1955	-	13.3684	4.39e-05	0.175	CCGGAAG
ERG	hTFtarget	NC_037357.1:14356363-14358362	1949	1955	-	12.7368	4.39e-05	0.175	CCGGAAG
ERG	hTFtarget	NC_037357.1:14356363-14358362	1949	1955	-	12.9211	4.39e-05	0.175	CCGGAAG
SNAI2	database	NC_037357.1:14356363-14358362	1766	1772	+	13.0204	4.39e-05	0.174	CCAGGTG
CREM	database	NC_037357.1:14356363-14358362	178	188	-	11.8667	4.4e-05	0.175	TGACGGCAGTC
KLF5	database	NC_037357.1:14356363-14358362	1924	1933	+	12.0816	4.4e-05	0.171	GCTACGCCCC
MAFK	hTFtarget	NC_037357.1:14356363-14358362	1727	1740	-	10.4091	4.4e-05	0.174	TTGCTGAATTAAGA
MED1	hTFtarget	NC_037357.1:14356363-14358362	1984	1999	-	9.5	4.4e-05	0.163	CCCGGCGCCTCGCGCC
EP300	hTFtarget	NC_037357.1:14356363-14358362	504	516	+	11.8939	4.4e-05	0.174	CAGCTTCCTTTTG
CREM	database	NC_037357.1:14356363-14358362	178	188	+	11.8384	4.4e-05	0.175	GACTGCCGTCA
KLF5	database	NC_037357.1:14356363-14358362	1924	1933	-	12.0714	4.4e-05	0.172	GGGGCGTAGC
GATA2	database	NC_037357.1:14356363-14358362	584	593	+	12	4.41e-05	0.175	CCAGATAATA
MYC	hTFtarget	NC_037357.1:14356363-14358362	1630	1641	+	12.0455	4.41e-05	0.175	GGGTGCGCGTGT
RBL2	hTFtarget	NC_037357.1:14356363-14358362	1984	1992	+	11.1711	4.41e-05	0.176	GGCGCGAGG
TCF4	hTFtarget	NC_037357.1:14356363-14358362	1276	1291	-	11.697	4.41e-05	0.0865	AGGTTCAAAGGAGTTA
AR	hTFtarget	NC_037357.1:14356363-14358362	834	848	-	11.6364	4.41e-05	0.087	GGTTCACCATGTACC
FOXL2	database	NC_037357.1:14356363-14358362	1429	1440	+	12.2541	4.42e-05	0.175	CAATACGAATTT
MED1	hTFtarget	NC_037357.1:14356363-14358362	1624	1638	+	10.2571	4.42e-05	0.0878	TGTTGGGGGTGCGCG
CBX4	hTFtarget	NC_037357.1:14356363-14358362	1980	1991	+	11.9474	4.42e-05	0.0867	AATGGGCGCGAG
CDK9	hTFtarget	NC_037357.1:14356363-14358362	1953	1974	-	8.94737	4.42e-05	0.103	CCGCGGAGCTTGCGCCACGCCG
SPI1	hTFtarget	NC_037357.1:14356363-14358362	1924	1935	+	10.5263	4.43e-05	0.176	GCTACGCCCCCG
CREB1	hTFtarget	NC_037357.1:14356363-14358362	1050	1061	-	11.8961	4.43e-05	0.176	GTGACATAATAG
NRF1	hTFtarget	NC_037357.1:14356363-14358362	1958	1969	+	9.24242	4.44e-05	0.114	TGGCGCAAGCTC
SMARCA4	hTFtarget	NC_037357.1:14356363-14358362	1922	1946	+	10.9221	4.44e-05	0.0705	GCGCTACGCCCCCGGCGCGCCAGTG
SPI1	hTFtarget	NC_037357.1:14356363-14358362	1922	1936	-	11	4.44e-05	0.128	CCGGGGGCGTAGCGC
FLI1	hTFtarget	NC_037357.1:14356363-14358362	772	783	+	11.1618	4.45e-05	0.172	AATGAATGAAGA
MYC	hTFtarget	NC_037357.1:14356363-14358362	1947	1955	+	12.4342	4.45e-05	0.177	CTCTTCCGG
RB1	hTFtarget	NC_037357.1:14356363-14358362	1980	1993	-	11.8485	4.45e-05	0.176	GCCTCGCGCCCATT
RELA	hTFtarget	NC_037357.1:14356363-14358362	1956	1971	+	8.63158	4.45e-05	0.0675	CGTGGCGCAAGCTCCG
SOX10	hTFtarget	NC_037357.1:14356363-14358362	1609	1630	-	11.4848	4.45e-05	0.174	CCCAACAAAGCATCCTTGTTCA
YY1	hTFtarget	NC_037357.1:14356363-14358362	1661	1672	-	11.75	4.45e-05	0.118	GCCTCCATCCTT
PAX1	database	NC_037357.1:14356363-14358362	1600	1616	-	7.9898	4.45e-05	0.177	CTTGTTCAAGAGTGACG
NR3C1	hTFtarget	NC_037357.1:14356363-14358362	33	48	+	11.6711	4.46e-05	0.0865	GAACATGGACAACAAG
SPI1	hTFtarget	NC_037357.1:14356363-14358362	1960	1971	-	11.0395	4.46e-05	0.0777	CGGAGCTTGCGC
TAF1	hTFtarget	NC_037357.1:14356363-14358362	1661	1675	+	10.3158	4.46e-05	0.177	AAGGATGGAGGCGGA
TCF4	hTFtarget	NC_037357.1:14356363-14358362	510	521	+	11.803	4.46e-05	0.0842	CCTTTTGAACTC
REST	hTFtarget	NC_037357.1:14356363-14358362	311	322	-	10.6316	4.47e-05	0.177	TGGAGATGTCCC
TAF3	hTFtarget	NC_037357.1:14356363-14358362	1680	1695	+	11.6053	4.47e-05	0.172	GGGAGCGAAGGCTACG
TCF4	hTFtarget	NC_037357.1:14356363-14358362	1280	1291	-	11.8889	4.47e-05	0.174	AGGTTCAAAGGA
CENPA	hTFtarget	NC_037357.1:14356363-14358362	150	165	+	8.40845	4.47e-05	0.176	TATTGTTGAGCCTTTC
SPDEF	database	NC_037357.1:14356363-14358362	1114	1123	-	11.8421	4.48e-05	0.178	ACAGGATATA
FLI1	hTFtarget	NC_037357.1:14356363-14358362	759	783	-	-25.7429	4.48e-05	0.038	TCTTCATTCATTCTGTGTCTCTTCC
REST	hTFtarget	NC_037357.1:14356363-14358362	239	247	+	11.2368	4.48e-05	0.166	GGTGCTAAA
SPI1	hTFtarget	NC_037357.1:14356363-14358362	1924	1935	+	11.3289	4.48e-05	0.098	GCTACGCCCCCG
TCF7L2	hTFtarget	NC_037357.1:14356363-14358362	510	521	-	11.9242	4.48e-05	0.079	GAGTTCAAAAGG
AR	hTFtarget	NC_037357.1:14356363-14358362	752	767	+	11.7179	4.49e-05	0.0572	GGGGAAGGGAAGAGAC
ATOH8	database	NC_037357.1:14356363-14358362	1766	1774	-	12.5612	4.49e-05	0.178	GACACCTGG
FLI1	hTFtarget	NC_037357.1:14356363-14358362	747	762	-	11.9242	4.5e-05	0.089	TTCCCTTCCCCCACTC
NFATC1	hTFtarget	NC_037357.1:14356363-14358362	388	396	+	12.0571	4.5e-05	0.176	AGTGGAAAG
TCF4	hTFtarget	NC_037357.1:14356363-14358362	1931	1952	-	8.94737	4.5e-05	0.0459	GAAGAGCACTGGCGCGCCGGGG
BCL6	database	NC_037357.1:14356363-14358362	885	900	-	9.68317	4.51e-05	0.172	TTCGTAGAAGTACTTT
CTNNB1	hTFtarget	NC_037357.1:14356363-14358362	1331	1342	+	11.8451	4.51e-05	0.0723	GACATCACAGGG
PAX3	database	NC_037357.1:14356363-14358362	1373	1382	-	11.1683	4.51e-05	0.0882	TAATCAATTC
GTF2I	hTFtarget	NC_037357.1:14356363-14358362	77	92	+	11.5513	4.52e-05	0.0867	GAGAAGTCAGGAGGGA
BARX2	hTFtarget	NC_037357.1:14356363-14358362	1666	1677	+	11.7571	4.52e-05	0.104	TGGAGGCGGAAT
SMAD1	hTFtarget	NC_037357.1:14356363-14358362	506	517	-	11.8421	4.52e-05	0.177	TCAAAAGGAAGC
AR	hTFtarget	NC_037357.1:14356363-14358362	389	404	+	11.7051	4.53e-05	0.0572	GTGGAAAGGGGATGAG
TCF4	database	NC_037357.1:14356363-14358362	882	891	+	12.1939	4.54e-05	0.116	ATCAAAGTAC
FOXK1	hTFtarget	NC_037357.1:14356363-14358362	98	109	-	11.115	4.54e-05	0.178	TACATCCACATA
MYC	hTFtarget	NC_037357.1:14356363-14358362	93	108	-	9.4	4.54e-05	0.0386	ACATCCACATACACTT
PCGF2	hTFtarget	NC_037357.1:14356363-14358362	71	92	-	11.6053	4.54e-05	0.0444	TCCCTCCTGACTTCTCTGTTTC
E2F6	hTFtarget	NC_037357.1:14356363-14358362	84	94	+	12.0571	4.54e-05	0.18	CAGGAGGGAAA
EP300	hTFtarget	NC_037357.1:14356363-14358362	1733	1744	+	12.0417	4.54e-05	0.179	TTCAGCAAACAT
LEF1	database	NC_037357.1:14356363-14358362	1144	1153	-	11.7475	4.55e-05	0.06	CTTCAAAGAG
AR	hTFtarget	NC_037357.1:14356363-14358362	800	815	-	11.3182	4.55e-05	0.0896	CAGAACAGAATCTGCC
IRF3	hTFtarget	NC_037357.1:14356363-14358362	805	820	-	11.4675	4.55e-05	0.0571	AGAAGCAGAACAGAAT
SPI1	hTFtarget	NC_037357.1:14356363-14358362	1666	1681	+	11.2286	4.55e-05	0.0883	TGGAGGCGGAATTTGG
EOMES	hTFtarget	NC_037357.1:14356363-14358362	234	249	+	11.6711	4.55e-05	0.0673	CAATGGGTGCTAAATG
EP300	hTFtarget	NC_037357.1:14356363-14358362	782	793	-	11.9211	4.55e-05	0.179	TGACAGTTTCTC
ESR1	hTFtarget	NC_037357.1:14356363-14358362	762	770	+	11.2676	4.56e-05	0.144	AGAGACACA
ETS1	hTFtarget	NC_037357.1:14356363-14358362	1973	1988	+	11.1	4.56e-05	0.0905	GGCAAGCAATGGGCGC
BRD3	hTFtarget	NC_037357.1:14356363-14358362	1629	1644	-	11.4805	4.56e-05	0.0871	CTCACACGCGCACCCC
RELA	hTFtarget	NC_037357.1:14356363-14358362	1958	1969	+	8.65789	4.56e-05	0.181	TGGCGCAAGCTC
STAT1	hTFtarget	NC_037357.1:14356363-14358362	1927	1942	+	8.76316	4.56e-05	0.109	ACGCCCCCGGCGCGCC
TCF7L2	hTFtarget	NC_037357.1:14356363-14358362	1282	1290	-	12.169	4.56e-05	0.0902	GGTTCAAAG
TRIM28	hTFtarget	NC_037357.1:14356363-14358362	755	776	-	9.54545	4.56e-05	0.0588	TCATTCTGTGTCTCTTCCCTTC
TP53	hTFtarget	NC_037357.1:14356363-14358362	1666	1681	+	10.974	4.57e-05	0.179	TGGAGGCGGAATTTGG
ZNF143	hTFtarget	NC_037357.1:14356363-14358362	1719	1734	+	11.5385	4.57e-05	0.0587	TTTTTCAGTCTTAATT
ERG	hTFtarget	NC_037357.1:14356363-14358362	1583	1607	+	-21.8816	4.57e-05	0.0241	CTTCTTTACTTTTCTGCCGTCACTC
NRF1	database	NC_037357.1:14356363-14358362	1960	1971	+	11.3636	4.58e-05	0.182	GCGCAAGCTCCG
EP300	hTFtarget	NC_037357.1:14356363-14358362	1330	1341	-	11.8169	4.58e-05	0.127	CCTGTGATGTCT
PROP1	database	NC_037357.1:14356363-14358362	1414	1428	+	11.7573	4.58e-05	0.154	TAGCTATTAATTTAA
PROP1	database	NC_037357.1:14356363-14358362	1414	1428	+	11.6957	4.59e-05	0.153	TAGCTATTAATTTAA
SPI1	hTFtarget	NC_037357.1:14356363-14358362	1937	1948	+	10.8684	4.59e-05	0.155	CGCGCCAGTGCT
SPI1	hTFtarget	NC_037357.1:14356363-14358362	1664	1679	-	11.3	4.59e-05	0.0891	AAATTCCGCCTCCATC
DDX5	hTFtarget	NC_037357.1:14356363-14358362	94	118	-	7.11688	4.59e-05	0.181	ACACCACACTACATCCACATACACT
E2F1	database	NC_037357.1:14356363-14358362	1982	1997	+	11.6514	4.6e-05	0.183	TGGGCGCGAGGCGCCG
ESR1	hTFtarget	NC_037357.1:14356363-14358362	1735	1743	+	11.961	4.6e-05	0.179	CAGCAAACA
GABPA	hTFtarget	NC_037357.1:14356363-14358362	1944	1958	+	11.1061	4.6e-05	0.183	GTGCTCTTCCGGCGT
HDAC2	hTFtarget	NC_037357.1:14356363-14358362	1971	1995	+	8.8	4.6e-05	0.179	GCGGCAAGCAATGGGCGCGAGGCGC
KLF1	hTFtarget	NC_037357.1:14356363-14358362	89	104	-	10.75	4.6e-05	0.0536	CCACATACACTTTCCC
POLR2A	hTFtarget	NC_037357.1:14356363-14358362	1898	1912	+	9.80263	4.6e-05	0.181	GCCGCTGCTAGCTCT
SMAD2/SMAD3	hTFtarget	NC_037357.1:14356363-14358362	820	834	+	11.5584	4.6e-05	0.177	TTAGCAAGACATTGG
TCF7L2	hTFtarget	NC_037357.1:14356363-14358362	506	514	-	11.9714	4.6e-05	0.182	AAAGGAAGC
NRF1	database	NC_037357.1:14356363-14358362	1960	1971	-	11.3514	4.6e-05	0.183	CGGAGCTTGCGC
AR	database	NC_037357.1:14356363-14358362	794	820	+	6.31707	4.61e-05	0.182	TTTATGGGCAGATTCTGTTCTGCTTCT
GTF3C2	hTFtarget	NC_037357.1:14356363-14358362	1654	1675	-	10.4699	4.61e-05	0.0901	TCCGCCTCCATCCTTCACTCCC
RB1	hTFtarget	NC_037357.1:14356363-14358362	80	95	+	11.7714	4.61e-05	0.0914	AAGTCAGGAGGGAAAG
E2F6	hTFtarget	NC_037357.1:14356363-14358362	80	95	-	11.3714	4.61e-05	0.182	CTTTCCCTCCTGACTT
E2F7	hTFtarget	NC_037357.1:14356363-14358362	1982	1993	+	11.4474	4.61e-05	0.183	TGGGCGCGAGGC
SOX17	database	NC_037357.1:14356363-14358362	1386	1403	+	8.34694	4.61e-05	0.0896	CACAATTTAGTATTGTCT
ETS1	hTFtarget	NC_037357.1:14356363-14358362	1946	1958	+	12.0152	4.62e-05	0.183	GCTCTTCCGGCGT
HIF1A	hTFtarget	NC_037357.1:14356363-14358362	1803	1821	-	8.25	4.62e-05	0.182	GGGCAAGGGTGCGAGCCTG
PALB2	hTFtarget	NC_037357.1:14356363-14358362	814	829	+	11.6429	4.62e-05	0.0901	TGCTTCTTAGCAAGAC
REST	hTFtarget	NC_037357.1:14356363-14358362	239	247	+	11.5132	4.62e-05	0.183	GGTGCTAAA
PAX9	database	NC_037357.1:14356363-14358362	1600	1616	-	5.16327	4.62e-05	0.184	CTTGTTCAAGAGTGACG
AR	hTFtarget	NC_037357.1:14356363-14358362	834	849	-	11.6857	4.63e-05	0.103	TGGTTCACCATGTACC
PBX3	hTFtarget	NC_037357.1:14356363-14358362	1924	1935	-	10.6571	4.63e-05	0.126	CGGGGGCGTAGC
GTF3C2	hTFtarget	NC_037357.1:14356363-14358362	490	511	+	10.4578	4.64e-05	0.0901	CCCCTCTTTTGCTTCAGCTTCC
HSF1	hTFtarget	NC_037357.1:14356363-14358362	1922	1937	-	11.0658	4.64e-05	0.0612	GCCGGGGGCGTAGCGC
NPAT	hTFtarget	NC_037357.1:14356363-14358362	1933	1948	+	6.93421	4.64e-05	0.128	CCGGCGCGCCAGTGCT
BRD7	hTFtarget	NC_037357.1:14356363-14358362	746	767	+	9.08974	4.64e-05	0.183	GGAGTGGGGGAAGGGAAGAGAC
BTAF1	hTFtarget	NC_037357.1:14356363-14358362	1551	1566	+	11.2436	4.64e-05	0.178	GAGAGAGAAAAAAAAT
TP53	hTFtarget	NC_037357.1:14356363-14358362	1487	1502	+	7.52857	4.64e-05	0.184	CAAGTCTGGGTATACA
NOTCH1	hTFtarget	NC_037357.1:14356363-14358362	1656	1676	+	8.97368	4.65e-05	0.061	GAGTGAAGGATGGAGGCGGAA
ZNF92	hTFtarget	NC_037357.1:14356363-14358362	1520	1535	-	3.91429	4.66e-05	0.126	GGCAACTGACAAGTAT
AR	hTFtarget	NC_037357.1:14356363-14358362	1733	1743	-	11.9306	4.66e-05	0.181	TGTTTGCTGAA
RXRA	hTFtarget	NC_037357.1:14356363-14358362	266	277	+	11.3117	4.67e-05	0.162	AAAGGAGTAGAA
SMAD4	hTFtarget	NC_037357.1:14356363-14358362	1931	1946	-	9.87324	4.67e-05	0.181	CACTGGCGCGCCGGGG
THAP1	database	NC_037357.1:14356363-14358362	38	58	+	7.16327	4.67e-05	0.185	TGGACAACAAGGAAAATGGTG
TCF4	hTFtarget	NC_037357.1:14356363-14358362	1936	1957	-	8.84211	4.69e-05	0.0459	CGCCGGAAGAGCACTGGCGCGC
EP300	hTFtarget	NC_037357.1:14356363-14358362	655	673	-	11.8571	4.69e-05	0.173	TTTTATCTGCTCCTAGAAA
FOXJ2	database	NC_037357.1:14356363-14358362	1265	1278	+	11.7008	4.7e-05	0.0772	CCATTAATATTTAA
BCOR	hTFtarget	NC_037357.1:14356363-14358362	2	13	+	11.6389	4.7e-05	0.185	AGGGAAATACAA
RUNX1T1	hTFtarget	NC_037357.1:14356363-14358362	504	512	-	12	4.7e-05	0.186	AGGAAGCTG
SRF	database	NC_037357.1:14356363-14358362	788	805	-	10.8966	4.71e-05	0.186	TCTGCCCATAAATGACAG
NRF1	hTFtarget	NC_037357.1:14356363-14358362	1627	1638	+	9.18421	4.71e-05	0.0936	TGGGGGTGCGCG
RUNX1	hTFtarget	NC_037357.1:14356363-14358362	755	766	+	11.7105	4.71e-05	0.126	GAAGGGAAGAGA
YY1	database	NC_037357.1:14356363-14358362	45	61	-	10.8673	4.72e-05	0.186	TATCACCATTTTCCTTG
ERMAP	hTFtarget	NC_037357.1:14356363-14358362	754	765	+	11.2429	4.72e-05	0.183	GGAAGGGAAGAG
SPI1	hTFtarget	NC_037357.1:14356363-14358362	1667	1677	-	11.2105	4.72e-05	0.118	ATTCCGCCTCC
SRF	hTFtarget	NC_037357.1:14356363-14358362	788	803	+	10.6818	4.73e-05	0.187	CTGTCATTTATGGGCA
TAL1	hTFtarget	NC_037357.1:14356363-14358362	655	672	+	11.8143	4.73e-05	0.187	TTTCTAGGAGCAGATAAA
GATA2	database	NC_037357.1:14356363-14358362	55	68	-	12.2	4.74e-05	0.151	GGAATGTTATCACC
RELA	hTFtarget	NC_037357.1:14356363-14358362	758	769	-	11.7532	4.74e-05	0.183	GTGTCTCTTCCC
REST	hTFtarget	NC_037357.1:14356363-14358362	1789	1797	+	11.2368	4.74e-05	0.102	AGTCCTGAA
EGR2	database	NC_037357.1:14356363-14358362	1924	1938	+	11.2787	4.75e-05	0.135	GCTACGCCCCCGGCG
ESR1	hTFtarget	NC_037357.1:14356363-14358362	747	768	+	-1.14085	4.75e-05	0.0456	GAGTGGGGGAAGGGAAGAGACA
SMAD1	hTFtarget	NC_037357.1:14356363-14358362	264	277	+	11.3766	4.75e-05	0.0915	AGAAAGGAGTAGAA
TBP	hTFtarget	NC_037357.1:14356363-14358362	671	686	-	10.3158	4.75e-05	0.0944	GATTGCATAGGGGTTT
AR	hTFtarget	NC_037357.1:14356363-14358362	833	848	+	11.4545	4.75e-05	0.183	GGGTACATGGTGAACC
AR	hTFtarget	NC_037357.1:14356363-14358362	1243	1258	+	11.4474	4.76e-05	0.0933	GGTAGACAGAGTACCT
ZNF263	hTFtarget	NC_037357.1:14356363-14358362	1656	1677	+	10.4545	4.76e-05	0.0372	GAGTGAAGGATGGAGGCGGAAT
[truncated: 2,095 more rows]
