# Supplementary material for: RBMX2 links Mycobacterium bovis infection to epithelial–mesenchymal transition and lung cancer progression
Source: eLife. 2025 Nov 24;14:RP107132. doi: 10.7554/eLife.107132 (PMC12643470; doi:10.7554/eLife.107132)
Supplement: Supplementary file 3. [file elife-107132-supp3.xlsx]

## Sheet: Sheet1
Table S2
Number	Primer	Sequence
1	Bovine-β-actin-F	5′-AGCAAGCAGGAGTACGATGAG-3′
2	Bovine-β-actin-R	5′-ATCCAACCGACTGCTGTCA-3′
3	Human-β-actin -F	5′- CACCATTGGCAATGAGCGGTTC-3′
4	Human-β-actin -R	5′- AGGTCTTTGCGGATGTCCACGT-3′
5	Bovine-RBMX2-F	5′-TCCCACCGGCACAAAAAGTC-3′
6	Bovine-RBMX2-R	5′-TCAGTGATACCTGAGCTCCC-3′
7	Human-RBMX2-F	5′-ACCCCCTCACCAAGTTTGTC-3′
8	Human-RBMX2-R	5′-GTGCTTCTTAGGGCCAGTGT-3′
9	Bovine-HSPB8-F-1	5′-GACCAAGGACGGATACGTGG-3′
10	Bovine-HSPB8-R-1	5′-AGTTCTTGGAGACGATGCCC-3′
11	Bovine-ST14-F-1	5′-CTCGGCGCTGGATTCAAGTA-3′
12	Bovine-ST14-R-1	5′-CAAGAACTCCACGCCTTCCT-3′
13	Bovine-MUC16-F-1	5′-TGTGCATGTGACAGCAGAGC-3′
14	Bovine-MUC16-R-1	5′-CTGGAAACTGGGAGTGGTCG-3′
15	Bovine-TNC-F-1	5′-TGGCATCGGAGAATGCCTTT-3′
16	Bovine-TNC-R-1	5′-CAGCTTCCTCTGGGTTCCTG-3′
17	Bovine-GPX2-F-1	5′-ACCCGTTTTCCCTCATGACC-3′
18	Bovine-GPX2-R-1	5′-CGGCCCAATGAGGAACTTCT-3′
19	Bovine-THBS2-F-1	5′-GGGGACGCTTGTAAAGACGA-3′
20	Bovine-THBS2-R-1	5′-AATCTGAGTGGTGCCCTTGG-3′
21	Bovine-IL-7-F-1	5′-GCAATTGCCTGAATAACGAACCT-3′
22	Bovine-IL-7-R-1	5′-TTACCCTTGCTGGTGCAGTT-3′
23	Bovine-IL-24-F-1	5′-GACGCCTGCCCAACTTTCTT-3′
24	Bovine-IL-24-R-1	5′-AAGGGATGCTTGAGGGCTTG-3′
25	Bovine-FRMD4B-F-1	5′-CAGAGACAGGAGCACCAAGG-3′
26	Bovine-FRMD4B-R-1	5′-TTAAACTGCCGTTGCTTGCC-3′
27	Bovine-OMD-F-1	5′-GCTCAACGTTGGACACAACA-3′
28	Bovine-OMD-R-1	5′-AGCTTATTGGCGCTTTCAGC-3′
29	Bovine-NOS3-F-1	5′-GTTCCCTCGCGTGAAGAACT-3′
30	Bovine-NOS3-R-1	5′-CTGGTTGATGAAGTCCCTGGC-3′
31	Bovine-MCTP1-F-1	5′-AGTTCCGACTTGGGCATCAG-3′
32	Bovine-MCTP1-R-1	5′-TACTGAGAGCCGACAGGTCA-3′
33	Bovine-MFAP5-F-1	5′-TGATATCCAGCCTTCCACCG-3′
34	Bovine-MFAP5-R-1	5′-CCGATGCACGGAGTAGAGTC-3′
35	Bovine-MMP-9-1-F	5′-CGCTATGGCTACACTCCTGG-3′
36	Bovine-MMP-9-1-R	5′-TGAGTTCGCCCTCAAAGGTC-3′
37	Bovine-N-cadherin-1-F	5′-CACTGCGATTGATGCTGACG-3′
38	Bovine-N-cadherin-1-R	5′-TGCCACCGTGATAATGTCCC-3′
39	Bovine-E-cadherin 1-F	5′-CAGAAGATGACACCCGGGAC-3′
40	Bovine-E-cadherin 1-R	5′-AGCATCCAGGCCCCTATGTA-3′
41	Bovine-CLDN-5-F-1	5′-CCTGGACCACAACATCGTGA-3′
42	Bovine-CLDN-5-R-1	5′-GGAGTCGTACACCTTGCACT-3′
43	Bovine-OCLN-F-1	5′-CTTTCAAAAAGGGCTCCCGC-3′
44	Bovine-OCLN-R-1	5′-TGGATATTCCCTGATCCAGTCG-3′
45	Bovine-TJP1-F-1	5′-CTCAAGTTCCTGAAGCCCGT-3′
46	Bovine-TJP1-R-1	5′-TAGGATCACCCGACGAGGAG-3′
47	Bovine-TNF-F-1	5′-GAAGTTGCTTGTGCCTCAGC-3′
48	Bovine-TNF-R-1	5′-AACCAGAGGGCTGTTGATGG-3′
49	Bovine-IL-6-F-1	5′-CTTCTGCTTTCCCTACCCCG-3′
50	Bovine-IL-6-R-1	5′-TTCTGCCAGTGTCTCCTTGC-3′
51	Bovine-IL-1β-F-1	5′-AAAAGCTTCAGGCAGGTGGT-3′
52	Bovine-IL-1β-R-1	5′-AACTCGTCGGAGGACGTTTC-3′
