# Supplementary material for: RBMX2 links Mycobacterium bovis infection to epithelial–mesenchymal transition and lung cancer progression
Source: eLife. 2025 Nov 24;14:RP107132. doi: 10.7554/eLife.107132 (PMC12643470; doi:10.7554/eLife.107132)
Supplement: Supplementary file 4. [file elife-107132-supp4.xlsx]

## Sheet: Sheet1
Table S3
Gene name	Sequence
MMP9	5′-AGGCACTGAAGGAATGAGGC-3′
	5′-CCCCGCTTGGTGGAAAT-3′
RBMX2	5′-CTGACAGGAGGACCAGAGTTT-3′
	5′-TGCCTAGTTGTAGGGTTGAAGT-3′
